# Supplementary material for: DEVOUR: Deleterious Variants on Uncovered Regions in Whole-Exome Sequencing
Source: PeerJ. 2023 Sep 15;11:e16026. doi: 10.7717/peerj.16026 (PMC10506587; doi:10.7717/peerj.16026)
Supplement: Supplemental Information 2 — Each row in this file provides the SRA sample id, chromosome name, start/end chromosomal coordinates for the located region, coverage depth for the region, start/end coordinates for the ClinVar annotation and the annotation description. [file peerj-11-16026-s002.xlsx]

## Sheet: hirschsprung_highCoverageResult
Sample ID	Chromosome	Start	End	Depth	Annotation Start	Annotation End	Annotation Description
ERR1840747	chr1	21546500	21546502	32	21546501	21546501	Hirschsprung_disease, _cardiac_defects, _and_autonomic_dysfunction|MONDO:MONDO:0013473, MedGen:C3151237, OMIM:613870|Pathogenic
ERR1840747	chr4	41749370	41749373	48	41749374	41749374	Neuroblastoma_with_Hirschsprung_disease|MedGen:C2751683|Pathogenic
ERR1840747	chr10	43606667	43606668	54	43606667	43606668	Sensorineural_hearing_loss|Hirschsprung_disease_1|Human_Phenotype_Ontology:HP:0000374, Human_Phenotype_Ontology:HP:0000407, Human_Phenotype_Ontology:HP:0001753, Human_Phenotype_Ontology:HP:0001916, Human_Phenotype_Ontology:HP:0008538, Human_Phenotype_Ontology:HP:0008553, Human_Phenotype_Ontology:HP:0008565, Human_Phenotype_Ontology:HP:0008576, Human_Phenotype_Ontology:HP:0008611, Human_Phenotype_…
ERR1840747	chr10	43609062	43609096	6	43609069	43609069	Familial_medullary_thyroid_carcinoma|Hereditary_cancer-predisposing_syndrome|Hirschsprung_disease|Multiple_endocrine_neoplasia, _type_2|not_provided|MONDO:MONDO:0007958, MedGen:C1833921, OMIM:155240, Orphanet:ORPHA99361|MONDO:MONDO:0015356, MedGen:C0027672, Orphanet:ORPHA140162, SNOMED_CT:699346009|MONDO:MONDO:0018309, MeSH:D006627, MedGen:C0019569, OMIM:PS142623, Orphanet:ORPHA388, SNOMED_CT:204…
ERR1840747	chr10	43609062	43609096	6	43609096	43609096	Pheochromocytoma|Hirschsprung_disease_1|Familial_medullary_thyroid_carcinoma|Multiple_endocrine_neoplasia, _type_2b|Multiple_endocrine_neoplasia, _type_2a|Congenital_central_hypoventilation|Multiple_endocrine_neoplasia, _type_2|none_provided|not_provided|Human_Phenotype_Ontology:HP:0002666, MONDO:MONDO:0008233, MedGen:C0031511, OMIM:171300|MONDO:MONDO:0007723, MedGen:C3888239, OMIM:142623|MONDO:M…
ERR1840747	chr10	43609099	43609106	5	43609102	43609102	Multiple_endocrine_neoplasia, _type_2a|Hereditary_cancer-predisposing_syndrome|Hirschsprung_disease|Multiple_endocrine_neoplasia, _type_2|not_provided|MONDO:MONDO:0008234, MeSH:D018813, MedGen:C0025268, OMIM:171400, Orphanet:ORPHA247698, SNOMED_CT:61808009|MONDO:MONDO:0015356, MedGen:C0027672, Orphanet:ORPHA140162, SNOMED_CT:699346009|MONDO:MONDO:0018309, MeSH:D006627, MedGen:C0019569, OMIM:PS142…
ERR1840747	chr10	43609099	43609106	5	43609102	43609102	Multiple_endocrine_neoplasia, _type_2a|Hereditary_cancer-predisposing_syndrome|Hirschsprung_disease|Multiple_endocrine_neoplasia, _type_2|not_specified|MONDO:MONDO:0008234, MeSH:D018813, MedGen:C0025268, OMIM:171400, Orphanet:ORPHA247698, SNOMED_CT:61808009|MONDO:MONDO:0015356, MedGen:C0027672, Orphanet:ORPHA140162, SNOMED_CT:699346009|MONDO:MONDO:0018309, MeSH:D006627, MedGen:C0019569, OMIM:PS14…
ERR1840747	chr10	43609099	43609106	5	43609103	43609103	Medullary_thyroid_carcinoma|Multiple_endocrine_neoplasia, _type_1|Multiple_endocrine_neoplasia, _type_2b|Multiple_endocrine_neoplasia, _type_2a|Multiple_endocrine_neoplasia, _type_4|Hirschsprung_disease|Multiple_endocrine_neoplasia, _type_2|none_provided|not_provided|Human_Phenotype_Ontology:HP:0002865, MONDO:MONDO:0015277, MeSH:C536914, MedGen:C0238462, Orphanet:ORPHA1332, SNOMED_CT:255032005|MO…
ERR1840747	chr10	43609099	43609106	5	43609104	43609104	Hereditary_cancer-predisposing_syndrome|Multiple_endocrine_neoplasia, _type_2|MULTIPLE_ENDOCRINE_NEOPLASIA, _TYPE_IIA, _WITH_HIRSCHSPRUNG_DISEASE|MONDO:MONDO:0015356, MedGen:C0027672, Orphanet:ORPHA140162, SNOMED_CT:699346009|MONDO:MONDO:0019003, MedGen:C4048306, Orphanet:ORPHA653, SNOMED_CT:61808009|MedGen:C4016286|Pathogenic
ERR1840747	chr10	43619179	43619180	61	43619180	43619180	Hirschsprung_disease|MONDO:MONDO:0018309, MeSH:D006627, MedGen:C0019569, OMIM:PS142623, Orphanet:ORPHA388, SNOMED_CT:204739008|Pathogenic
ERR1840747	chr10	43622125	43622126	85	43622126	43622126	Hirschsprung_disease|MONDO:MONDO:0018309, MeSH:D006627, MedGen:C0019569, OMIM:PS142623, Orphanet:ORPHA388, SNOMED_CT:204739008|Pathogenic
ERR1840747	chr13	78475312	78475318	23	78475316	78475316	Waardenburg_syndrome_type_4A|Hirschsprung_disease_2|MONDO:MONDO:0010192, MedGen:C1848519, OMIM:277580|MONDO:MONDO:0010833, MedGen:C1838564, OMIM:600155|Pathogenic
ERR1840747	chrX	153132112	153132118	42	153132113	153132114	Hydrocephalus, _X-linked, _with_hirschsprung_disease|MedGen:C4017784|Pathogenic
ERR1840748	chr4	41749373	41749374	71	41749374	41749374	Neuroblastoma_with_Hirschsprung_disease|MedGen:C2751683|Pathogenic
ERR1840748	chr10	43595942	43595944	111	43595944	43595944	Hirschsprung_disease|MONDO:MONDO:0018309, MeSH:D006627, MedGen:C0019569, OMIM:PS142623, Orphanet:ORPHA388, SNOMED_CT:204739008|Pathogenic
ERR1840748	chr10	43600632	43600634	49	43600634	43600634	Hirschsprung_disease|MONDO:MONDO:0018309, MeSH:D006627, MedGen:C0019569, OMIM:PS142623, Orphanet:ORPHA388, SNOMED_CT:204739008|Pathogenic
ERR1840748	chr10	43606667	43606667	51	43606667	43606668	Sensorineural_hearing_loss|Hirschsprung_disease_1|Human_Phenotype_Ontology:HP:0000374, Human_Phenotype_Ontology:HP:0000407, Human_Phenotype_Ontology:HP:0001753, Human_Phenotype_Ontology:HP:0001916, Human_Phenotype_Ontology:HP:0008538, Human_Phenotype_Ontology:HP:0008553, Human_Phenotype_Ontology:HP:0008565, Human_Phenotype_Ontology:HP:0008576, Human_Phenotype_Ontology:HP:0008611, Human_Phenotype_…
ERR1840748	chr10	43609025	43609068	5	43609069	43609069	Familial_medullary_thyroid_carcinoma|Hereditary_cancer-predisposing_syndrome|Hirschsprung_disease|Multiple_endocrine_neoplasia, _type_2|not_provided|MONDO:MONDO:0007958, MedGen:C1833921, OMIM:155240, Orphanet:ORPHA99361|MONDO:MONDO:0015356, MedGen:C0027672, Orphanet:ORPHA140162, SNOMED_CT:699346009|MONDO:MONDO:0018309, MeSH:D006627, MedGen:C0019569, OMIM:PS142623, Orphanet:ORPHA388, SNOMED_CT:204…
ERR1840748	chr10	43609069	43609074	6	43609069	43609069	Familial_medullary_thyroid_carcinoma|Hereditary_cancer-predisposing_syndrome|Hirschsprung_disease|Multiple_endocrine_neoplasia, _type_2|not_provided|MONDO:MONDO:0007958, MedGen:C1833921, OMIM:155240, Orphanet:ORPHA99361|MONDO:MONDO:0015356, MedGen:C0027672, Orphanet:ORPHA140162, SNOMED_CT:699346009|MONDO:MONDO:0018309, MeSH:D006627, MedGen:C0019569, OMIM:PS142623, Orphanet:ORPHA388, SNOMED_CT:204…
ERR1840748	chr10	43609094	43609113	6	43609096	43609096	Pheochromocytoma|Hirschsprung_disease_1|Familial_medullary_thyroid_carcinoma|Multiple_endocrine_neoplasia, _type_2b|Multiple_endocrine_neoplasia, _type_2a|Congenital_central_hypoventilation|Multiple_endocrine_neoplasia, _type_2|none_provided|not_provided|Human_Phenotype_Ontology:HP:0002666, MONDO:MONDO:0008233, MedGen:C0031511, OMIM:171300|MONDO:MONDO:0007723, MedGen:C3888239, OMIM:142623|MONDO:M…
ERR1840748	chr10	43609094	43609113	6	43609102	43609102	Multiple_endocrine_neoplasia, _type_2a|Hereditary_cancer-predisposing_syndrome|Hirschsprung_disease|Multiple_endocrine_neoplasia, _type_2|not_provided|MONDO:MONDO:0008234, MeSH:D018813, MedGen:C0025268, OMIM:171400, Orphanet:ORPHA247698, SNOMED_CT:61808009|MONDO:MONDO:0015356, MedGen:C0027672, Orphanet:ORPHA140162, SNOMED_CT:699346009|MONDO:MONDO:0018309, MeSH:D006627, MedGen:C0019569, OMIM:PS142…
ERR1840748	chr10	43609094	43609113	6	43609102	43609102	Multiple_endocrine_neoplasia, _type_2a|Hereditary_cancer-predisposing_syndrome|Hirschsprung_disease|Multiple_endocrine_neoplasia, _type_2|not_specified|MONDO:MONDO:0008234, MeSH:D018813, MedGen:C0025268, OMIM:171400, Orphanet:ORPHA247698, SNOMED_CT:61808009|MONDO:MONDO:0015356, MedGen:C0027672, Orphanet:ORPHA140162, SNOMED_CT:699346009|MONDO:MONDO:0018309, MeSH:D006627, MedGen:C0019569, OMIM:PS14…
ERR1840748	chr10	43609094	43609113	6	43609103	43609103	Medullary_thyroid_carcinoma|Multiple_endocrine_neoplasia, _type_1|Multiple_endocrine_neoplasia, _type_2b|Multiple_endocrine_neoplasia, _type_2a|Multiple_endocrine_neoplasia, _type_4|Hirschsprung_disease|Multiple_endocrine_neoplasia, _type_2|none_provided|not_provided|Human_Phenotype_Ontology:HP:0002865, MONDO:MONDO:0015277, MeSH:C536914, MedGen:C0238462, Orphanet:ORPHA1332, SNOMED_CT:255032005|MO…
ERR1840748	chr10	43609094	43609113	6	43609104	43609104	Hereditary_cancer-predisposing_syndrome|Multiple_endocrine_neoplasia, _type_2|MULTIPLE_ENDOCRINE_NEOPLASIA, _TYPE_IIA, _WITH_HIRSCHSPRUNG_DISEASE|MONDO:MONDO:0015356, MedGen:C0027672, Orphanet:ORPHA140162, SNOMED_CT:699346009|MONDO:MONDO:0019003, MedGen:C4048306, Orphanet:ORPHA653, SNOMED_CT:61808009|MedGen:C4016286|Pathogenic
ERR1840748	chr10	43622125	43622127	69	43622126	43622126	Hirschsprung_disease|MONDO:MONDO:0018309, MeSH:D006627, MedGen:C0019569, OMIM:PS142623, Orphanet:ORPHA388, SNOMED_CT:204739008|Pathogenic
ERR1840748	chr13	78475313	78475316	25	78475316	78475316	Waardenburg_syndrome_type_4A|Hirschsprung_disease_2|MONDO:MONDO:0010192, MedGen:C1848519, OMIM:277580|MONDO:MONDO:0010833, MedGen:C1838564, OMIM:600155|Pathogenic
ERR1840748	chrX	153132113	153132114	39	153132113	153132114	Hydrocephalus, _X-linked, _with_hirschsprung_disease|MedGen:C4017784|Pathogenic
ERR1840749	chr1	21546497	21546504	22	21546501	21546501	Hirschsprung_disease, _cardiac_defects, _and_autonomic_dysfunction|MONDO:MONDO:0013473, MedGen:C3151237, OMIM:613870|Pathogenic
ERR1840749	chr22	38369489	38369509	14	38369492	38369503	Peripheral_demyelinating_neuropathy, _central_dysmyelination, _Waardenburg_syndrome, _and_Hirschsprung_disease|MONDO:MONDO:0012198, MedGen:C1836727, OMIM:609136, Orphanet:ORPHA163746|Pathogenic
ERR1840749	chr22	38369726	38369728	38	38369728	38369728	Peripheral_demyelinating_neuropathy, _central_dysmyelination, _Waardenburg_syndrome, _and_Hirschsprung_disease|MONDO:MONDO:0012198, MedGen:C1836727, OMIM:609136, Orphanet:ORPHA163746|Pathogenic
ERR1840749	chr22	38369961	38369964	69	38369962	38369962	Peripheral_demyelinating_neuropathy, _central_dysmyelination, _Waardenburg_syndrome, _and_Hirschsprung_disease|MONDO:MONDO:0012198, MedGen:C1836727, OMIM:609136, Orphanet:ORPHA163746|Pathogenic
ERR1840749	chr22	38369961	38369964	69	38369964	38369964	Peripheral_demyelinating_neuropathy, _central_dysmyelination, _Waardenburg_syndrome, _and_Hirschsprung_disease|MONDO:MONDO:0012198, MedGen:C1836727, OMIM:609136, Orphanet:ORPHA163746|Pathogenic
ERR1840749	chr22	38369987	38369988	79	38369988	38369988	Peripheral_demyelinating_neuropathy, _central_dysmyelination, _Waardenburg_syndrome, _and_Hirschsprung_disease|MONDO:MONDO:0012198, MedGen:C1836727, OMIM:609136, Orphanet:ORPHA163746|Pathogenic
ERR1840749	chr22	38370150	38370150	140	38370151	38370151	Peripheral_demyelinating_neuropathy, _central_dysmyelination, _Waardenburg_syndrome, _and_Hirschsprung_disease|MONDO:MONDO:0012198, MedGen:C1836727, OMIM:609136, Orphanet:ORPHA163746|Pathogenic
ERR1840749	chr22	38370151	38370151	141	38370151	38370151	Peripheral_demyelinating_neuropathy, _central_dysmyelination, _Waardenburg_syndrome, _and_Hirschsprung_disease|MONDO:MONDO:0012198, MedGen:C1836727, OMIM:609136, Orphanet:ORPHA163746|Pathogenic
ERR1840749	chr22	38370154	38370154	136	38370155	38370155	Peripheral_demyelinating_neuropathy, _central_dysmyelination, _Waardenburg_syndrome, _and_Hirschsprung_disease|MONDO:MONDO:0012198, MedGen:C1836727, OMIM:609136, Orphanet:ORPHA163746|Pathogenic
ERR1840749	chr22	38370155	38370155	130	38370155	38370155	Peripheral_demyelinating_neuropathy, _central_dysmyelination, _Waardenburg_syndrome, _and_Hirschsprung_disease|MONDO:MONDO:0012198, MedGen:C1836727, OMIM:609136, Orphanet:ORPHA163746|Pathogenic
ERR1840749	chr22	38379365	38379366	24	38379367	38379367	Peripheral_demyelinating_neuropathy, _central_dysmyelination, _Waardenburg_syndrome, _and_Hirschsprung_disease|MONDO:MONDO:0012198, MedGen:C1836727, OMIM:609136, Orphanet:ORPHA163746|Pathogenic
ERR1840749	chr22	38379367	38379367	25	38379367	38379367	Peripheral_demyelinating_neuropathy, _central_dysmyelination, _Waardenburg_syndrome, _and_Hirschsprung_disease|MONDO:MONDO:0012198, MedGen:C1836727, OMIM:609136, Orphanet:ORPHA163746|Pathogenic
ERR1840749	chr4	41749369	41749374	51	41749374	41749374	Neuroblastoma_with_Hirschsprung_disease|MedGen:C2751683|Pathogenic
ERR1840749	chr10	43595943	43595946	76	43595944	43595944	Hirschsprung_disease|MONDO:MONDO:0018309, MeSH:D006627, MedGen:C0019569, OMIM:PS142623, Orphanet:ORPHA388, SNOMED_CT:204739008|Pathogenic
ERR1840749	chr10	43600485	43600486	37	43600486	43600486	Hirschsprung_disease_1|MONDO:MONDO:0007723, MedGen:C3888239, OMIM:142623|Pathogenic
ERR1840749	chr10	43606666	43606667	50	43606667	43606668	Sensorineural_hearing_loss|Hirschsprung_disease_1|Human_Phenotype_Ontology:HP:0000374, Human_Phenotype_Ontology:HP:0000407, Human_Phenotype_Ontology:HP:0001753, Human_Phenotype_Ontology:HP:0001916, Human_Phenotype_Ontology:HP:0008538, Human_Phenotype_Ontology:HP:0008553, Human_Phenotype_Ontology:HP:0008565, Human_Phenotype_Ontology:HP:0008576, Human_Phenotype_Ontology:HP:0008611, Human_Phenotype_…
ERR1840749	chr10	43609069	43609091	5	43609069	43609069	Familial_medullary_thyroid_carcinoma|Hereditary_cancer-predisposing_syndrome|Hirschsprung_disease|Multiple_endocrine_neoplasia, _type_2|not_provided|MONDO:MONDO:0007958, MedGen:C1833921, OMIM:155240, Orphanet:ORPHA99361|MONDO:MONDO:0015356, MedGen:C0027672, Orphanet:ORPHA140162, SNOMED_CT:699346009|MONDO:MONDO:0018309, MeSH:D006627, MedGen:C0019569, OMIM:PS142623, Orphanet:ORPHA388, SNOMED_CT:204…
ERR1840749	chr10	43609094	43609105	5	43609096	43609096	Pheochromocytoma|Hirschsprung_disease_1|Familial_medullary_thyroid_carcinoma|Multiple_endocrine_neoplasia, _type_2b|Multiple_endocrine_neoplasia, _type_2a|Congenital_central_hypoventilation|Multiple_endocrine_neoplasia, _type_2|none_provided|not_provided|Human_Phenotype_Ontology:HP:0002666, MONDO:MONDO:0008233, MedGen:C0031511, OMIM:171300|MONDO:MONDO:0007723, MedGen:C3888239, OMIM:142623|MONDO:M…
ERR1840749	chr10	43609094	43609105	5	43609102	43609102	Multiple_endocrine_neoplasia, _type_2a|Hereditary_cancer-predisposing_syndrome|Hirschsprung_disease|Multiple_endocrine_neoplasia, _type_2|not_provided|MONDO:MONDO:0008234, MeSH:D018813, MedGen:C0025268, OMIM:171400, Orphanet:ORPHA247698, SNOMED_CT:61808009|MONDO:MONDO:0015356, MedGen:C0027672, Orphanet:ORPHA140162, SNOMED_CT:699346009|MONDO:MONDO:0018309, MeSH:D006627, MedGen:C0019569, OMIM:PS142…
ERR1840749	chr10	43609094	43609105	5	43609102	43609102	Multiple_endocrine_neoplasia, _type_2a|Hereditary_cancer-predisposing_syndrome|Hirschsprung_disease|Multiple_endocrine_neoplasia, _type_2|not_specified|MONDO:MONDO:0008234, MeSH:D018813, MedGen:C0025268, OMIM:171400, Orphanet:ORPHA247698, SNOMED_CT:61808009|MONDO:MONDO:0015356, MedGen:C0027672, Orphanet:ORPHA140162, SNOMED_CT:699346009|MONDO:MONDO:0018309, MeSH:D006627, MedGen:C0019569, OMIM:PS14…
ERR1840749	chr10	43609094	43609105	5	43609103	43609103	Medullary_thyroid_carcinoma|Multiple_endocrine_neoplasia, _type_1|Multiple_endocrine_neoplasia, _type_2b|Multiple_endocrine_neoplasia, _type_2a|Multiple_endocrine_neoplasia, _type_4|Hirschsprung_disease|Multiple_endocrine_neoplasia, _type_2|none_provided|not_provided|Human_Phenotype_Ontology:HP:0002865, MONDO:MONDO:0015277, MeSH:C536914, MedGen:C0238462, Orphanet:ORPHA1332, SNOMED_CT:255032005|MO…
ERR1840749	chr10	43609094	43609105	5	43609104	43609104	Hereditary_cancer-predisposing_syndrome|Multiple_endocrine_neoplasia, _type_2|MULTIPLE_ENDOCRINE_NEOPLASIA, _TYPE_IIA, _WITH_HIRSCHSPRUNG_DISEASE|MONDO:MONDO:0015356, MedGen:C0027672, Orphanet:ORPHA140162, SNOMED_CT:699346009|MONDO:MONDO:0019003, MedGen:C4048306, Orphanet:ORPHA653, SNOMED_CT:61808009|MedGen:C4016286|Pathogenic
ERR1840749	chr10	43622123	43622126	59	43622126	43622126	Hirschsprung_disease|MONDO:MONDO:0018309, MeSH:D006627, MedGen:C0019569, OMIM:PS142623, Orphanet:ORPHA388, SNOMED_CT:204739008|Pathogenic
ERR1840749	chr13	78475313	78475317	13	78475316	78475316	Waardenburg_syndrome_type_4A|Hirschsprung_disease_2|MONDO:MONDO:0010192, MedGen:C1848519, OMIM:277580|MONDO:MONDO:0010833, MedGen:C1838564, OMIM:600155|Pathogenic
ERR1840749	chrX	153132113	153132116	37	153132113	153132114	Hydrocephalus, _X-linked, _with_hirschsprung_disease|MedGen:C4017784|Pathogenic
ERR1840753	chr22	38369491	38369493	18	38369492	38369503	Peripheral_demyelinating_neuropathy, _central_dysmyelination, _Waardenburg_syndrome, _and_Hirschsprung_disease|MONDO:MONDO:0012198, MedGen:C1836727, OMIM:609136, Orphanet:ORPHA163746|Pathogenic
ERR1840753	chr22	38369494	38369496	17	38369492	38369503	Peripheral_demyelinating_neuropathy, _central_dysmyelination, _Waardenburg_syndrome, _and_Hirschsprung_disease|MONDO:MONDO:0012198, MedGen:C1836727, OMIM:609136, Orphanet:ORPHA163746|Pathogenic
ERR1840753	chr22	38369497	38369509	16	38369492	38369503	Peripheral_demyelinating_neuropathy, _central_dysmyelination, _Waardenburg_syndrome, _and_Hirschsprung_disease|MONDO:MONDO:0012198, MedGen:C1836727, OMIM:609136, Orphanet:ORPHA163746|Pathogenic
ERR1840753	chr22	38369961	38369961	87	38369962	38369962	Peripheral_demyelinating_neuropathy, _central_dysmyelination, _Waardenburg_syndrome, _and_Hirschsprung_disease|MONDO:MONDO:0012198, MedGen:C1836727, OMIM:609136, Orphanet:ORPHA163746|Pathogenic
ERR1840753	chr22	38369962	38369962	85	38369962	38369962	Peripheral_demyelinating_neuropathy, _central_dysmyelination, _Waardenburg_syndrome, _and_Hirschsprung_disease|MONDO:MONDO:0012198, MedGen:C1836727, OMIM:609136, Orphanet:ORPHA163746|Pathogenic
ERR1840753	chr22	38369963	38369964	83	38369964	38369964	Peripheral_demyelinating_neuropathy, _central_dysmyelination, _Waardenburg_syndrome, _and_Hirschsprung_disease|MONDO:MONDO:0012198, MedGen:C1836727, OMIM:609136, Orphanet:ORPHA163746|Pathogenic
ERR1840753	chr22	38369986	38369987	100	38369988	38369988	Peripheral_demyelinating_neuropathy, _central_dysmyelination, _Waardenburg_syndrome, _and_Hirschsprung_disease|MONDO:MONDO:0012198, MedGen:C1836727, OMIM:609136, Orphanet:ORPHA163746|Pathogenic
ERR1840753	chr22	38369988	38369990	103	38369988	38369988	Peripheral_demyelinating_neuropathy, _central_dysmyelination, _Waardenburg_syndrome, _and_Hirschsprung_disease|MONDO:MONDO:0012198, MedGen:C1836727, OMIM:609136, Orphanet:ORPHA163746|Pathogenic
ERR1840753	chr22	38370150	38370151	117	38370151	38370151	Peripheral_demyelinating_neuropathy, _central_dysmyelination, _Waardenburg_syndrome, _and_Hirschsprung_disease|MONDO:MONDO:0012198, MedGen:C1836727, OMIM:609136, Orphanet:ORPHA163746|Pathogenic
ERR1840753	chr22	38370154	38370154	117	38370155	38370155	Peripheral_demyelinating_neuropathy, _central_dysmyelination, _Waardenburg_syndrome, _and_Hirschsprung_disease|MONDO:MONDO:0012198, MedGen:C1836727, OMIM:609136, Orphanet:ORPHA163746|Pathogenic
ERR1840753	chr22	38370155	38370155	116	38370155	38370155	Peripheral_demyelinating_neuropathy, _central_dysmyelination, _Waardenburg_syndrome, _and_Hirschsprung_disease|MONDO:MONDO:0012198, MedGen:C1836727, OMIM:609136, Orphanet:ORPHA163746|Pathogenic
ERR1840753	chr22	38379364	38379367	19	38379367	38379367	Peripheral_demyelinating_neuropathy, _central_dysmyelination, _Waardenburg_syndrome, _and_Hirschsprung_disease|MONDO:MONDO:0012198, MedGen:C1836727, OMIM:609136, Orphanet:ORPHA163746|Pathogenic
ERR1840753	chr4	41749372	41749374	48	41749374	41749374	Neuroblastoma_with_Hirschsprung_disease|MedGen:C2751683|Pathogenic
ERR1840753	chr10	43604608	43604611	29	43604611	43604611	Hirschsprung_disease_1|MONDO:MONDO:0007723, MedGen:C3888239, OMIM:142623|Pathogenic
ERR1840753	chr10	43606664	43606667	41	43606667	43606668	Sensorineural_hearing_loss|Hirschsprung_disease_1|Human_Phenotype_Ontology:HP:0000374, Human_Phenotype_Ontology:HP:0000407, Human_Phenotype_Ontology:HP:0001753, Human_Phenotype_Ontology:HP:0001916, Human_Phenotype_Ontology:HP:0008538, Human_Phenotype_Ontology:HP:0008553, Human_Phenotype_Ontology:HP:0008565, Human_Phenotype_Ontology:HP:0008576, Human_Phenotype_Ontology:HP:0008611, Human_Phenotype_…
ERR1840753	chr10	43609068	43609083	11	43609069	43609069	Familial_medullary_thyroid_carcinoma|Hereditary_cancer-predisposing_syndrome|Hirschsprung_disease|Multiple_endocrine_neoplasia, _type_2|not_provided|MONDO:MONDO:0007958, MedGen:C1833921, OMIM:155240, Orphanet:ORPHA99361|MONDO:MONDO:0015356, MedGen:C0027672, Orphanet:ORPHA140162, SNOMED_CT:699346009|MONDO:MONDO:0018309, MeSH:D006627, MedGen:C0019569, OMIM:PS142623, Orphanet:ORPHA388, SNOMED_CT:204…
ERR1840753	chr10	43609086	43609100	16	43609096	43609096	Pheochromocytoma|Hirschsprung_disease_1|Familial_medullary_thyroid_carcinoma|Multiple_endocrine_neoplasia, _type_2b|Multiple_endocrine_neoplasia, _type_2a|Congenital_central_hypoventilation|Multiple_endocrine_neoplasia, _type_2|none_provided|not_provided|Human_Phenotype_Ontology:HP:0002666, MONDO:MONDO:0008233, MedGen:C0031511, OMIM:171300|MONDO:MONDO:0007723, MedGen:C3888239, OMIM:142623|MONDO:M…
ERR1840753	chr10	43609101	43609108	17	43609102	43609102	Multiple_endocrine_neoplasia, _type_2a|Hereditary_cancer-predisposing_syndrome|Hirschsprung_disease|Multiple_endocrine_neoplasia, _type_2|not_provided|MONDO:MONDO:0008234, MeSH:D018813, MedGen:C0025268, OMIM:171400, Orphanet:ORPHA247698, SNOMED_CT:61808009|MONDO:MONDO:0015356, MedGen:C0027672, Orphanet:ORPHA140162, SNOMED_CT:699346009|MONDO:MONDO:0018309, MeSH:D006627, MedGen:C0019569, OMIM:PS142…
ERR1840753	chr10	43609101	43609108	17	43609102	43609102	Multiple_endocrine_neoplasia, _type_2a|Hereditary_cancer-predisposing_syndrome|Hirschsprung_disease|Multiple_endocrine_neoplasia, _type_2|not_specified|MONDO:MONDO:0008234, MeSH:D018813, MedGen:C0025268, OMIM:171400, Orphanet:ORPHA247698, SNOMED_CT:61808009|MONDO:MONDO:0015356, MedGen:C0027672, Orphanet:ORPHA140162, SNOMED_CT:699346009|MONDO:MONDO:0018309, MeSH:D006627, MedGen:C0019569, OMIM:PS14…
ERR1840753	chr10	43609101	43609108	17	43609103	43609103	Medullary_thyroid_carcinoma|Multiple_endocrine_neoplasia, _type_1|Multiple_endocrine_neoplasia, _type_2b|Multiple_endocrine_neoplasia, _type_2a|Multiple_endocrine_neoplasia, _type_4|Hirschsprung_disease|Multiple_endocrine_neoplasia, _type_2|none_provided|not_provided|Human_Phenotype_Ontology:HP:0002865, MONDO:MONDO:0015277, MeSH:C536914, MedGen:C0238462, Orphanet:ORPHA1332, SNOMED_CT:255032005|MO…
ERR1840753	chr10	43609101	43609108	17	43609104	43609104	Hereditary_cancer-predisposing_syndrome|Multiple_endocrine_neoplasia, _type_2|MULTIPLE_ENDOCRINE_NEOPLASIA, _TYPE_IIA, _WITH_HIRSCHSPRUNG_DISEASE|MONDO:MONDO:0015356, MedGen:C0027672, Orphanet:ORPHA140162, SNOMED_CT:699346009|MONDO:MONDO:0019003, MedGen:C4048306, Orphanet:ORPHA653, SNOMED_CT:61808009|MedGen:C4016286|Pathogenic
ERR1840753	chr10	43619179	43619180	66	43619180	43619180	Hirschsprung_disease|MONDO:MONDO:0018309, MeSH:D006627, MedGen:C0019569, OMIM:PS142623, Orphanet:ORPHA388, SNOMED_CT:204739008|Pathogenic
ERR1840753	chr13	78475312	78475316	23	78475316	78475316	Waardenburg_syndrome_type_4A|Hirschsprung_disease_2|MONDO:MONDO:0010192, MedGen:C1848519, OMIM:277580|MONDO:MONDO:0010833, MedGen:C1838564, OMIM:600155|Pathogenic
ERR1840753	chrX	153132112	153132114	22	153132113	153132114	Hydrocephalus, _X-linked, _with_hirschsprung_disease|MedGen:C4017784|Pathogenic
ERR1840753	chrX	153132278	153132282	29	153132281	153132281	Hydrocephalus, _X-linked, _with_hirschsprung_disease|MedGen:C4017784|Pathogenic
ERR1840754	chr1	21546498	21546501	41	21546501	21546501	Hirschsprung_disease, _cardiac_defects, _and_autonomic_dysfunction|MONDO:MONDO:0013473, MedGen:C3151237, OMIM:613870|Pathogenic
ERR1840754	chr22	38369490	38369492	29	38369492	38369503	Peripheral_demyelinating_neuropathy, _central_dysmyelination, _Waardenburg_syndrome, _and_Hirschsprung_disease|MONDO:MONDO:0012198, MedGen:C1836727, OMIM:609136, Orphanet:ORPHA163746|Pathogenic
ERR1840754	chr22	38369493	38369495	32	38369492	38369503	Peripheral_demyelinating_neuropathy, _central_dysmyelination, _Waardenburg_syndrome, _and_Hirschsprung_disease|MONDO:MONDO:0012198, MedGen:C1836727, OMIM:609136, Orphanet:ORPHA163746|Pathogenic
ERR1840754	chr22	38369496	38369498	33	38369492	38369503	Peripheral_demyelinating_neuropathy, _central_dysmyelination, _Waardenburg_syndrome, _and_Hirschsprung_disease|MONDO:MONDO:0012198, MedGen:C1836727, OMIM:609136, Orphanet:ORPHA163746|Pathogenic
ERR1840754	chr22	38369499	38369499	32	38369492	38369503	Peripheral_demyelinating_neuropathy, _central_dysmyelination, _Waardenburg_syndrome, _and_Hirschsprung_disease|MONDO:MONDO:0012198, MedGen:C1836727, OMIM:609136, Orphanet:ORPHA163746|Pathogenic
ERR1840754	chr22	38369500	38369501	33	38369492	38369503	Peripheral_demyelinating_neuropathy, _central_dysmyelination, _Waardenburg_syndrome, _and_Hirschsprung_disease|MONDO:MONDO:0012198, MedGen:C1836727, OMIM:609136, Orphanet:ORPHA163746|Pathogenic
ERR1840754	chr22	38369502	38369503	34	38369492	38369503	Peripheral_demyelinating_neuropathy, _central_dysmyelination, _Waardenburg_syndrome, _and_Hirschsprung_disease|MONDO:MONDO:0012198, MedGen:C1836727, OMIM:609136, Orphanet:ORPHA163746|Pathogenic
ERR1840754	chr22	38369961	38369961	107	38369962	38369962	Peripheral_demyelinating_neuropathy, _central_dysmyelination, _Waardenburg_syndrome, _and_Hirschsprung_disease|MONDO:MONDO:0012198, MedGen:C1836727, OMIM:609136, Orphanet:ORPHA163746|Pathogenic
ERR1840754	chr22	38369962	38369962	105	38369962	38369962	Peripheral_demyelinating_neuropathy, _central_dysmyelination, _Waardenburg_syndrome, _and_Hirschsprung_disease|MONDO:MONDO:0012198, MedGen:C1836727, OMIM:609136, Orphanet:ORPHA163746|Pathogenic
ERR1840754	chr22	38369963	38369963	107	38369964	38369964	Peripheral_demyelinating_neuropathy, _central_dysmyelination, _Waardenburg_syndrome, _and_Hirschsprung_disease|MONDO:MONDO:0012198, MedGen:C1836727, OMIM:609136, Orphanet:ORPHA163746|Pathogenic
ERR1840754	chr22	38369964	38369964	108	38369964	38369964	Peripheral_demyelinating_neuropathy, _central_dysmyelination, _Waardenburg_syndrome, _and_Hirschsprung_disease|MONDO:MONDO:0012198, MedGen:C1836727, OMIM:609136, Orphanet:ORPHA163746|Pathogenic
ERR1840754	chr22	38369987	38369988	121	38369988	38369988	Peripheral_demyelinating_neuropathy, _central_dysmyelination, _Waardenburg_syndrome, _and_Hirschsprung_disease|MONDO:MONDO:0012198, MedGen:C1836727, OMIM:609136, Orphanet:ORPHA163746|Pathogenic
ERR1840754	chr22	38370150	38370152	125	38370151	38370151	Peripheral_demyelinating_neuropathy, _central_dysmyelination, _Waardenburg_syndrome, _and_Hirschsprung_disease|MONDO:MONDO:0012198, MedGen:C1836727, OMIM:609136, Orphanet:ORPHA163746|Pathogenic
ERR1840754	chr22	38370154	38370154	123	38370155	38370155	Peripheral_demyelinating_neuropathy, _central_dysmyelination, _Waardenburg_syndrome, _and_Hirschsprung_disease|MONDO:MONDO:0012198, MedGen:C1836727, OMIM:609136, Orphanet:ORPHA163746|Pathogenic
ERR1840754	chr22	38370155	38370155	119	38370155	38370155	Peripheral_demyelinating_neuropathy, _central_dysmyelination, _Waardenburg_syndrome, _and_Hirschsprung_disease|MONDO:MONDO:0012198, MedGen:C1836727, OMIM:609136, Orphanet:ORPHA163746|Pathogenic
ERR1840754	chr22	38379365	38379366	36	38379367	38379367	Peripheral_demyelinating_neuropathy, _central_dysmyelination, _Waardenburg_syndrome, _and_Hirschsprung_disease|MONDO:MONDO:0012198, MedGen:C1836727, OMIM:609136, Orphanet:ORPHA163746|Pathogenic
ERR1840754	chr22	38379367	38379368	38	38379367	38379367	Peripheral_demyelinating_neuropathy, _central_dysmyelination, _Waardenburg_syndrome, _and_Hirschsprung_disease|MONDO:MONDO:0012198, MedGen:C1836727, OMIM:609136, Orphanet:ORPHA163746|Pathogenic
ERR1840754	chr4	41749372	41749373	62	41749374	41749374	Neuroblastoma_with_Hirschsprung_disease|MedGen:C2751683|Pathogenic
ERR1840754	chr10	43600485	43600487	50	43600486	43600486	Hirschsprung_disease_1|MONDO:MONDO:0007723, MedGen:C3888239, OMIM:142623|Pathogenic
ERR1840754	chr10	43600633	43600634	78	43600634	43600634	Hirschsprung_disease|MONDO:MONDO:0018309, MeSH:D006627, MedGen:C0019569, OMIM:PS142623, Orphanet:ORPHA388, SNOMED_CT:204739008|Pathogenic
ERR1840754	chr10	43606665	43606667	28	43606667	43606668	Sensorineural_hearing_loss|Hirschsprung_disease_1|Human_Phenotype_Ontology:HP:0000374, Human_Phenotype_Ontology:HP:0000407, Human_Phenotype_Ontology:HP:0001753, Human_Phenotype_Ontology:HP:0001916, Human_Phenotype_Ontology:HP:0008538, Human_Phenotype_Ontology:HP:0008553, Human_Phenotype_Ontology:HP:0008565, Human_Phenotype_Ontology:HP:0008576, Human_Phenotype_Ontology:HP:0008611, Human_Phenotype_…
ERR1840754	chr10	43609054	43609072	5	43609069	43609069	Familial_medullary_thyroid_carcinoma|Hereditary_cancer-predisposing_syndrome|Hirschsprung_disease|Multiple_endocrine_neoplasia, _type_2|not_provided|MONDO:MONDO:0007958, MedGen:C1833921, OMIM:155240, Orphanet:ORPHA99361|MONDO:MONDO:0015356, MedGen:C0027672, Orphanet:ORPHA140162, SNOMED_CT:699346009|MONDO:MONDO:0018309, MeSH:D006627, MedGen:C0019569, OMIM:PS142623, Orphanet:ORPHA388, SNOMED_CT:204…
ERR1840754	chr10	43609090	43609102	5	43609096	43609096	Pheochromocytoma|Hirschsprung_disease_1|Familial_medullary_thyroid_carcinoma|Multiple_endocrine_neoplasia, _type_2b|Multiple_endocrine_neoplasia, _type_2a|Congenital_central_hypoventilation|Multiple_endocrine_neoplasia, _type_2|none_provided|not_provided|Human_Phenotype_Ontology:HP:0002666, MONDO:MONDO:0008233, MedGen:C0031511, OMIM:171300|MONDO:MONDO:0007723, MedGen:C3888239, OMIM:142623|MONDO:M…
ERR1840754	chr10	43609090	43609102	5	43609102	43609102	Multiple_endocrine_neoplasia, _type_2a|Hereditary_cancer-predisposing_syndrome|Hirschsprung_disease|Multiple_endocrine_neoplasia, _type_2|not_provided|MONDO:MONDO:0008234, MeSH:D018813, MedGen:C0025268, OMIM:171400, Orphanet:ORPHA247698, SNOMED_CT:61808009|MONDO:MONDO:0015356, MedGen:C0027672, Orphanet:ORPHA140162, SNOMED_CT:699346009|MONDO:MONDO:0018309, MeSH:D006627, MedGen:C0019569, OMIM:PS142…
ERR1840754	chr10	43609090	43609102	5	43609102	43609102	Multiple_endocrine_neoplasia, _type_2a|Hereditary_cancer-predisposing_syndrome|Hirschsprung_disease|Multiple_endocrine_neoplasia, _type_2|not_specified|MONDO:MONDO:0008234, MeSH:D018813, MedGen:C0025268, OMIM:171400, Orphanet:ORPHA247698, SNOMED_CT:61808009|MONDO:MONDO:0015356, MedGen:C0027672, Orphanet:ORPHA140162, SNOMED_CT:699346009|MONDO:MONDO:0018309, MeSH:D006627, MedGen:C0019569, OMIM:PS14…
ERR1840754	chr10	43609090	43609102	5	43609103	43609103	Medullary_thyroid_carcinoma|Multiple_endocrine_neoplasia, _type_1|Multiple_endocrine_neoplasia, _type_2b|Multiple_endocrine_neoplasia, _type_2a|Multiple_endocrine_neoplasia, _type_4|Hirschsprung_disease|Multiple_endocrine_neoplasia, _type_2|none_provided|not_provided|Human_Phenotype_Ontology:HP:0002865, MONDO:MONDO:0015277, MeSH:C536914, MedGen:C0238462, Orphanet:ORPHA1332, SNOMED_CT:255032005|MO…
ERR1840754	chr10	43609103	43609108	6	43609103	43609103	Medullary_thyroid_carcinoma|Multiple_endocrine_neoplasia, _type_1|Multiple_endocrine_neoplasia, _type_2b|Multiple_endocrine_neoplasia, _type_2a|Multiple_endocrine_neoplasia, _type_4|Hirschsprung_disease|Multiple_endocrine_neoplasia, _type_2|none_provided|not_provided|Human_Phenotype_Ontology:HP:0002865, MONDO:MONDO:0015277, MeSH:C536914, MedGen:C0238462, Orphanet:ORPHA1332, SNOMED_CT:255032005|MO…
ERR1840754	chr10	43609103	43609108	6	43609104	43609104	Hereditary_cancer-predisposing_syndrome|Multiple_endocrine_neoplasia, _type_2|MULTIPLE_ENDOCRINE_NEOPLASIA, _TYPE_IIA, _WITH_HIRSCHSPRUNG_DISEASE|MONDO:MONDO:0015356, MedGen:C0027672, Orphanet:ORPHA140162, SNOMED_CT:699346009|MONDO:MONDO:0019003, MedGen:C4048306, Orphanet:ORPHA653, SNOMED_CT:61808009|MedGen:C4016286|Pathogenic
ERR1840754	chr10	43619179	43619180	76	43619180	43619180	Hirschsprung_disease|MONDO:MONDO:0018309, MeSH:D006627, MedGen:C0019569, OMIM:PS142623, Orphanet:ORPHA388, SNOMED_CT:204739008|Pathogenic
ERR1840754	chr13	78475312	78475316	22	78475316	78475316	Waardenburg_syndrome_type_4A|Hirschsprung_disease_2|MONDO:MONDO:0010192, MedGen:C1848519, OMIM:277580|MONDO:MONDO:0010833, MedGen:C1838564, OMIM:600155|Pathogenic
ERR1840754	chrX	153132113	153132115	36	153132113	153132114	Hydrocephalus, _X-linked, _with_hirschsprung_disease|MedGen:C4017784|Pathogenic
ERR1840755	chr1	21546499	21546502	41	21546501	21546501	Hirschsprung_disease, _cardiac_defects, _and_autonomic_dysfunction|MONDO:MONDO:0013473, MedGen:C3151237, OMIM:613870|Pathogenic
ERR1840755	chr4	41749373	41749374	70	41749374	41749374	Neuroblastoma_with_Hirschsprung_disease|MedGen:C2751683|Pathogenic
ERR1840755	chr10	43606667	43606668	51	43606667	43606668	Sensorineural_hearing_loss|Hirschsprung_disease_1|Human_Phenotype_Ontology:HP:0000374, Human_Phenotype_Ontology:HP:0000407, Human_Phenotype_Ontology:HP:0001753, Human_Phenotype_Ontology:HP:0001916, Human_Phenotype_Ontology:HP:0008538, Human_Phenotype_Ontology:HP:0008553, Human_Phenotype_Ontology:HP:0008565, Human_Phenotype_Ontology:HP:0008576, Human_Phenotype_Ontology:HP:0008611, Human_Phenotype_…
ERR1840755	chr10	43609065	43609080	9	43609069	43609069	Familial_medullary_thyroid_carcinoma|Hereditary_cancer-predisposing_syndrome|Hirschsprung_disease|Multiple_endocrine_neoplasia, _type_2|not_provided|MONDO:MONDO:0007958, MedGen:C1833921, OMIM:155240, Orphanet:ORPHA99361|MONDO:MONDO:0015356, MedGen:C0027672, Orphanet:ORPHA140162, SNOMED_CT:699346009|MONDO:MONDO:0018309, MeSH:D006627, MedGen:C0019569, OMIM:PS142623, Orphanet:ORPHA388, SNOMED_CT:204…
ERR1840755	chr10	43609088	43609103	11	43609096	43609096	Pheochromocytoma|Hirschsprung_disease_1|Familial_medullary_thyroid_carcinoma|Multiple_endocrine_neoplasia, _type_2b|Multiple_endocrine_neoplasia, _type_2a|Congenital_central_hypoventilation|Multiple_endocrine_neoplasia, _type_2|none_provided|not_provided|Human_Phenotype_Ontology:HP:0002666, MONDO:MONDO:0008233, MedGen:C0031511, OMIM:171300|MONDO:MONDO:0007723, MedGen:C3888239, OMIM:142623|MONDO:M…
ERR1840755	chr10	43609088	43609103	11	43609102	43609102	Multiple_endocrine_neoplasia, _type_2a|Hereditary_cancer-predisposing_syndrome|Hirschsprung_disease|Multiple_endocrine_neoplasia, _type_2|not_provided|MONDO:MONDO:0008234, MeSH:D018813, MedGen:C0025268, OMIM:171400, Orphanet:ORPHA247698, SNOMED_CT:61808009|MONDO:MONDO:0015356, MedGen:C0027672, Orphanet:ORPHA140162, SNOMED_CT:699346009|MONDO:MONDO:0018309, MeSH:D006627, MedGen:C0019569, OMIM:PS142…
ERR1840755	chr10	43609088	43609103	11	43609102	43609102	Multiple_endocrine_neoplasia, _type_2a|Hereditary_cancer-predisposing_syndrome|Hirschsprung_disease|Multiple_endocrine_neoplasia, _type_2|not_specified|MONDO:MONDO:0008234, MeSH:D018813, MedGen:C0025268, OMIM:171400, Orphanet:ORPHA247698, SNOMED_CT:61808009|MONDO:MONDO:0015356, MedGen:C0027672, Orphanet:ORPHA140162, SNOMED_CT:699346009|MONDO:MONDO:0018309, MeSH:D006627, MedGen:C0019569, OMIM:PS14…
ERR1840755	chr10	43609088	43609103	11	43609103	43609103	Medullary_thyroid_carcinoma|Multiple_endocrine_neoplasia, _type_1|Multiple_endocrine_neoplasia, _type_2b|Multiple_endocrine_neoplasia, _type_2a|Multiple_endocrine_neoplasia, _type_4|Hirschsprung_disease|Multiple_endocrine_neoplasia, _type_2|none_provided|not_provided|Human_Phenotype_Ontology:HP:0002865, MONDO:MONDO:0015277, MeSH:C536914, MedGen:C0238462, Orphanet:ORPHA1332, SNOMED_CT:255032005|MO…
ERR1840755	chr10	43609088	43609103	11	43609104	43609104	Hereditary_cancer-predisposing_syndrome|Multiple_endocrine_neoplasia, _type_2|MULTIPLE_ENDOCRINE_NEOPLASIA, _TYPE_IIA, _WITH_HIRSCHSPRUNG_DISEASE|MONDO:MONDO:0015356, MedGen:C0027672, Orphanet:ORPHA140162, SNOMED_CT:699346009|MONDO:MONDO:0019003, MedGen:C4048306, Orphanet:ORPHA653, SNOMED_CT:61808009|MedGen:C4016286|Pathogenic
ERR1840755	chr13	78475312	78475317	19	78475316	78475316	Waardenburg_syndrome_type_4A|Hirschsprung_disease_2|MONDO:MONDO:0010192, MedGen:C1848519, OMIM:277580|MONDO:MONDO:0010833, MedGen:C1838564, OMIM:600155|Pathogenic
ERR1840755	chrX	153132113	153132114	58	153132113	153132114	Hydrocephalus, _X-linked, _with_hirschsprung_disease|MedGen:C4017784|Pathogenic
ERR1840755	chrX	153132279	153132281	65	153132281	153132281	Hydrocephalus, _X-linked, _with_hirschsprung_disease|MedGen:C4017784|Pathogenic
ERR1840756	chr4	41749372	41749373	86	41749374	41749374	Neuroblastoma_with_Hirschsprung_disease|MedGen:C2751683|Pathogenic
ERR1840756	chr10	43595943	43595944	119	43595944	43595944	Hirschsprung_disease|MONDO:MONDO:0018309, MeSH:D006627, MedGen:C0019569, OMIM:PS142623, Orphanet:ORPHA388, SNOMED_CT:204739008|Pathogenic
ERR1840756	chr10	43600484	43600486	56	43600486	43600486	Hirschsprung_disease_1|MONDO:MONDO:0007723, MedGen:C3888239, OMIM:142623|Pathogenic
ERR1840756	chr10	43600633	43600635	63	43600634	43600634	Hirschsprung_disease|MONDO:MONDO:0018309, MeSH:D006627, MedGen:C0019569, OMIM:PS142623, Orphanet:ORPHA388, SNOMED_CT:204739008|Pathogenic
ERR1840756	chr10	43604608	43604611	42	43604611	43604611	Hirschsprung_disease_1|MONDO:MONDO:0007723, MedGen:C3888239, OMIM:142623|Pathogenic
ERR1840756	chr10	43606666	43606667	59	43606667	43606668	Sensorineural_hearing_loss|Hirschsprung_disease_1|Human_Phenotype_Ontology:HP:0000374, Human_Phenotype_Ontology:HP:0000407, Human_Phenotype_Ontology:HP:0001753, Human_Phenotype_Ontology:HP:0001916, Human_Phenotype_Ontology:HP:0008538, Human_Phenotype_Ontology:HP:0008553, Human_Phenotype_Ontology:HP:0008565, Human_Phenotype_Ontology:HP:0008576, Human_Phenotype_Ontology:HP:0008611, Human_Phenotype_…
ERR1840756	chr10	43609058	43609088	9	43609069	43609069	Familial_medullary_thyroid_carcinoma|Hereditary_cancer-predisposing_syndrome|Hirschsprung_disease|Multiple_endocrine_neoplasia, _type_2|not_provided|MONDO:MONDO:0007958, MedGen:C1833921, OMIM:155240, Orphanet:ORPHA99361|MONDO:MONDO:0015356, MedGen:C0027672, Orphanet:ORPHA140162, SNOMED_CT:699346009|MONDO:MONDO:0018309, MeSH:D006627, MedGen:C0019569, OMIM:PS142623, Orphanet:ORPHA388, SNOMED_CT:204…
ERR1840756	chr10	43609095	43609096	11	43609096	43609096	Pheochromocytoma|Hirschsprung_disease_1|Familial_medullary_thyroid_carcinoma|Multiple_endocrine_neoplasia, _type_2b|Multiple_endocrine_neoplasia, _type_2a|Congenital_central_hypoventilation|Multiple_endocrine_neoplasia, _type_2|none_provided|not_provided|Human_Phenotype_Ontology:HP:0002666, MONDO:MONDO:0008233, MedGen:C0031511, OMIM:171300|MONDO:MONDO:0007723, MedGen:C3888239, OMIM:142623|MONDO:M…
ERR1840756	chr10	43609097	43609103	12	43609102	43609102	Multiple_endocrine_neoplasia, _type_2a|Hereditary_cancer-predisposing_syndrome|Hirschsprung_disease|Multiple_endocrine_neoplasia, _type_2|not_provided|MONDO:MONDO:0008234, MeSH:D018813, MedGen:C0025268, OMIM:171400, Orphanet:ORPHA247698, SNOMED_CT:61808009|MONDO:MONDO:0015356, MedGen:C0027672, Orphanet:ORPHA140162, SNOMED_CT:699346009|MONDO:MONDO:0018309, MeSH:D006627, MedGen:C0019569, OMIM:PS142…
ERR1840756	chr10	43609097	43609103	12	43609102	43609102	Multiple_endocrine_neoplasia, _type_2a|Hereditary_cancer-predisposing_syndrome|Hirschsprung_disease|Multiple_endocrine_neoplasia, _type_2|not_specified|MONDO:MONDO:0008234, MeSH:D018813, MedGen:C0025268, OMIM:171400, Orphanet:ORPHA247698, SNOMED_CT:61808009|MONDO:MONDO:0015356, MedGen:C0027672, Orphanet:ORPHA140162, SNOMED_CT:699346009|MONDO:MONDO:0018309, MeSH:D006627, MedGen:C0019569, OMIM:PS14…
ERR1840756	chr10	43609097	43609103	12	43609103	43609103	Medullary_thyroid_carcinoma|Multiple_endocrine_neoplasia, _type_1|Multiple_endocrine_neoplasia, _type_2b|Multiple_endocrine_neoplasia, _type_2a|Multiple_endocrine_neoplasia, _type_4|Hirschsprung_disease|Multiple_endocrine_neoplasia, _type_2|none_provided|not_provided|Human_Phenotype_Ontology:HP:0002865, MONDO:MONDO:0015277, MeSH:C536914, MedGen:C0238462, Orphanet:ORPHA1332, SNOMED_CT:255032005|MO…
ERR1840756	chr10	43609097	43609103	12	43609104	43609104	Hereditary_cancer-predisposing_syndrome|Multiple_endocrine_neoplasia, _type_2|MULTIPLE_ENDOCRINE_NEOPLASIA, _TYPE_IIA, _WITH_HIRSCHSPRUNG_DISEASE|MONDO:MONDO:0015356, MedGen:C0027672, Orphanet:ORPHA140162, SNOMED_CT:699346009|MONDO:MONDO:0019003, MedGen:C4048306, Orphanet:ORPHA653, SNOMED_CT:61808009|MedGen:C4016286|Pathogenic
ERR1840756	chr13	78475315	78475319	42	78475316	78475316	Waardenburg_syndrome_type_4A|Hirschsprung_disease_2|MONDO:MONDO:0010192, MedGen:C1848519, OMIM:277580|MONDO:MONDO:0010833, MedGen:C1838564, OMIM:600155|Pathogenic
ERR1840756	chrX	153132112	153132116	35	153132113	153132114	Hydrocephalus, _X-linked, _with_hirschsprung_disease|MedGen:C4017784|Pathogenic
ERR1840757	chr22	38369492	38369493	21	38369492	38369503	Peripheral_demyelinating_neuropathy, _central_dysmyelination, _Waardenburg_syndrome, _and_Hirschsprung_disease|MONDO:MONDO:0012198, MedGen:C1836727, OMIM:609136, Orphanet:ORPHA163746|Pathogenic
ERR1840757	chr22	38369494	38369494	20	38369492	38369503	Peripheral_demyelinating_neuropathy, _central_dysmyelination, _Waardenburg_syndrome, _and_Hirschsprung_disease|MONDO:MONDO:0012198, MedGen:C1836727, OMIM:609136, Orphanet:ORPHA163746|Pathogenic
ERR1840757	chr22	38369495	38369495	19	38369492	38369503	Peripheral_demyelinating_neuropathy, _central_dysmyelination, _Waardenburg_syndrome, _and_Hirschsprung_disease|MONDO:MONDO:0012198, MedGen:C1836727, OMIM:609136, Orphanet:ORPHA163746|Pathogenic
ERR1840757	chr22	38369496	38369496	20	38369492	38369503	Peripheral_demyelinating_neuropathy, _central_dysmyelination, _Waardenburg_syndrome, _and_Hirschsprung_disease|MONDO:MONDO:0012198, MedGen:C1836727, OMIM:609136, Orphanet:ORPHA163746|Pathogenic
ERR1840757	chr22	38369497	38369497	21	38369492	38369503	Peripheral_demyelinating_neuropathy, _central_dysmyelination, _Waardenburg_syndrome, _and_Hirschsprung_disease|MONDO:MONDO:0012198, MedGen:C1836727, OMIM:609136, Orphanet:ORPHA163746|Pathogenic
ERR1840757	chr22	38369498	38369498	22	38369492	38369503	Peripheral_demyelinating_neuropathy, _central_dysmyelination, _Waardenburg_syndrome, _and_Hirschsprung_disease|MONDO:MONDO:0012198, MedGen:C1836727, OMIM:609136, Orphanet:ORPHA163746|Pathogenic
ERR1840757	chr22	38369499	38369501	24	38369492	38369503	Peripheral_demyelinating_neuropathy, _central_dysmyelination, _Waardenburg_syndrome, _and_Hirschsprung_disease|MONDO:MONDO:0012198, MedGen:C1836727, OMIM:609136, Orphanet:ORPHA163746|Pathogenic
ERR1840757	chr22	38369502	38369502	26	38369492	38369503	Peripheral_demyelinating_neuropathy, _central_dysmyelination, _Waardenburg_syndrome, _and_Hirschsprung_disease|MONDO:MONDO:0012198, MedGen:C1836727, OMIM:609136, Orphanet:ORPHA163746|Pathogenic
ERR1840757	chr22	38369726	38369729	49	38369728	38369728	Peripheral_demyelinating_neuropathy, _central_dysmyelination, _Waardenburg_syndrome, _and_Hirschsprung_disease|MONDO:MONDO:0012198, MedGen:C1836727, OMIM:609136, Orphanet:ORPHA163746|Pathogenic
ERR1840757	chr22	38369961	38369961	107	38369962	38369962	Peripheral_demyelinating_neuropathy, _central_dysmyelination, _Waardenburg_syndrome, _and_Hirschsprung_disease|MONDO:MONDO:0012198, MedGen:C1836727, OMIM:609136, Orphanet:ORPHA163746|Pathogenic
ERR1840757	chr22	38369962	38369962	110	38369962	38369962	Peripheral_demyelinating_neuropathy, _central_dysmyelination, _Waardenburg_syndrome, _and_Hirschsprung_disease|MONDO:MONDO:0012198, MedGen:C1836727, OMIM:609136, Orphanet:ORPHA163746|Pathogenic
ERR1840757	chr22	38369963	38369967	108	38369964	38369964	Peripheral_demyelinating_neuropathy, _central_dysmyelination, _Waardenburg_syndrome, _and_Hirschsprung_disease|MONDO:MONDO:0012198, MedGen:C1836727, OMIM:609136, Orphanet:ORPHA163746|Pathogenic
ERR1840757	chr22	38369987	38369987	123	38369988	38369988	Peripheral_demyelinating_neuropathy, _central_dysmyelination, _Waardenburg_syndrome, _and_Hirschsprung_disease|MONDO:MONDO:0012198, MedGen:C1836727, OMIM:609136, Orphanet:ORPHA163746|Pathogenic
ERR1840757	chr22	38369988	38369988	124	38369988	38369988	Peripheral_demyelinating_neuropathy, _central_dysmyelination, _Waardenburg_syndrome, _and_Hirschsprung_disease|MONDO:MONDO:0012198, MedGen:C1836727, OMIM:609136, Orphanet:ORPHA163746|Pathogenic
ERR1840757	chr22	38370150	38370150	165	38370151	38370151	Peripheral_demyelinating_neuropathy, _central_dysmyelination, _Waardenburg_syndrome, _and_Hirschsprung_disease|MONDO:MONDO:0012198, MedGen:C1836727, OMIM:609136, Orphanet:ORPHA163746|Pathogenic
ERR1840757	chr22	38370151	38370151	166	38370151	38370151	Peripheral_demyelinating_neuropathy, _central_dysmyelination, _Waardenburg_syndrome, _and_Hirschsprung_disease|MONDO:MONDO:0012198, MedGen:C1836727, OMIM:609136, Orphanet:ORPHA163746|Pathogenic
ERR1840757	chr22	38370153	38370154	164	38370155	38370155	Peripheral_demyelinating_neuropathy, _central_dysmyelination, _Waardenburg_syndrome, _and_Hirschsprung_disease|MONDO:MONDO:0012198, MedGen:C1836727, OMIM:609136, Orphanet:ORPHA163746|Pathogenic
ERR1840757	chr22	38370155	38370155	162	38370155	38370155	Peripheral_demyelinating_neuropathy, _central_dysmyelination, _Waardenburg_syndrome, _and_Hirschsprung_disease|MONDO:MONDO:0012198, MedGen:C1836727, OMIM:609136, Orphanet:ORPHA163746|Pathogenic
ERR1840757	chr22	38379366	38379368	37	38379367	38379367	Peripheral_demyelinating_neuropathy, _central_dysmyelination, _Waardenburg_syndrome, _and_Hirschsprung_disease|MONDO:MONDO:0012198, MedGen:C1836727, OMIM:609136, Orphanet:ORPHA163746|Pathogenic
ERR1840757	chr4	41749372	41749374	78	41749374	41749374	Neuroblastoma_with_Hirschsprung_disease|MedGen:C2751683|Pathogenic
ERR1840757	chr10	43595943	43595945	124	43595944	43595944	Hirschsprung_disease|MONDO:MONDO:0018309, MeSH:D006627, MedGen:C0019569, OMIM:PS142623, Orphanet:ORPHA388, SNOMED_CT:204739008|Pathogenic
ERR1840757	chr10	43600485	43600486	49	43600486	43600486	Hirschsprung_disease_1|MONDO:MONDO:0007723, MedGen:C3888239, OMIM:142623|Pathogenic
ERR1840757	chr10	43604609	43604612	42	43604611	43604611	Hirschsprung_disease_1|MONDO:MONDO:0007723, MedGen:C3888239, OMIM:142623|Pathogenic
ERR1840757	chr10	43606664	43606668	65	43606667	43606668	Sensorineural_hearing_loss|Hirschsprung_disease_1|Human_Phenotype_Ontology:HP:0000374, Human_Phenotype_Ontology:HP:0000407, Human_Phenotype_Ontology:HP:0001753, Human_Phenotype_Ontology:HP:0001916, Human_Phenotype_Ontology:HP:0008538, Human_Phenotype_Ontology:HP:0008553, Human_Phenotype_Ontology:HP:0008565, Human_Phenotype_Ontology:HP:0008576, Human_Phenotype_Ontology:HP:0008611, Human_Phenotype_…
ERR1840757	chr10	43609066	43609077	13	43609069	43609069	Familial_medullary_thyroid_carcinoma|Hereditary_cancer-predisposing_syndrome|Hirschsprung_disease|Multiple_endocrine_neoplasia, _type_2|not_provided|MONDO:MONDO:0007958, MedGen:C1833921, OMIM:155240, Orphanet:ORPHA99361|MONDO:MONDO:0015356, MedGen:C0027672, Orphanet:ORPHA140162, SNOMED_CT:699346009|MONDO:MONDO:0018309, MeSH:D006627, MedGen:C0019569, OMIM:PS142623, Orphanet:ORPHA388, SNOMED_CT:204…
ERR1840757	chr10	43609094	43609095	11	43609096	43609096	Pheochromocytoma|Hirschsprung_disease_1|Familial_medullary_thyroid_carcinoma|Multiple_endocrine_neoplasia, _type_2b|Multiple_endocrine_neoplasia, _type_2a|Congenital_central_hypoventilation|Multiple_endocrine_neoplasia, _type_2|none_provided|not_provided|Human_Phenotype_Ontology:HP:0002666, MONDO:MONDO:0008233, MedGen:C0031511, OMIM:171300|MONDO:MONDO:0007723, MedGen:C3888239, OMIM:142623|MONDO:M…
ERR1840757	chr10	43609096	43609101	10	43609096	43609096	Pheochromocytoma|Hirschsprung_disease_1|Familial_medullary_thyroid_carcinoma|Multiple_endocrine_neoplasia, _type_2b|Multiple_endocrine_neoplasia, _type_2a|Congenital_central_hypoventilation|Multiple_endocrine_neoplasia, _type_2|none_provided|not_provided|Human_Phenotype_Ontology:HP:0002666, MONDO:MONDO:0008233, MedGen:C0031511, OMIM:171300|MONDO:MONDO:0007723, MedGen:C3888239, OMIM:142623|MONDO:M…
ERR1840757	chr10	43609096	43609101	10	43609102	43609102	Multiple_endocrine_neoplasia, _type_2a|Hereditary_cancer-predisposing_syndrome|Hirschsprung_disease|Multiple_endocrine_neoplasia, _type_2|not_provided|MONDO:MONDO:0008234, MeSH:D018813, MedGen:C0025268, OMIM:171400, Orphanet:ORPHA247698, SNOMED_CT:61808009|MONDO:MONDO:0015356, MedGen:C0027672, Orphanet:ORPHA140162, SNOMED_CT:699346009|MONDO:MONDO:0018309, MeSH:D006627, MedGen:C0019569, OMIM:PS142…
ERR1840757	chr10	43609096	43609101	10	43609102	43609102	Multiple_endocrine_neoplasia, _type_2a|Hereditary_cancer-predisposing_syndrome|Hirschsprung_disease|Multiple_endocrine_neoplasia, _type_2|not_specified|MONDO:MONDO:0008234, MeSH:D018813, MedGen:C0025268, OMIM:171400, Orphanet:ORPHA247698, SNOMED_CT:61808009|MONDO:MONDO:0015356, MedGen:C0027672, Orphanet:ORPHA140162, SNOMED_CT:699346009|MONDO:MONDO:0018309, MeSH:D006627, MedGen:C0019569, OMIM:PS14…
ERR1840757	chr10	43609102	43609110	11	43609102	43609102	Multiple_endocrine_neoplasia, _type_2a|Hereditary_cancer-predisposing_syndrome|Hirschsprung_disease|Multiple_endocrine_neoplasia, _type_2|not_provided|MONDO:MONDO:0008234, MeSH:D018813, MedGen:C0025268, OMIM:171400, Orphanet:ORPHA247698, SNOMED_CT:61808009|MONDO:MONDO:0015356, MedGen:C0027672, Orphanet:ORPHA140162, SNOMED_CT:699346009|MONDO:MONDO:0018309, MeSH:D006627, MedGen:C0019569, OMIM:PS142…
ERR1840757	chr10	43609102	43609110	11	43609102	43609102	Multiple_endocrine_neoplasia, _type_2a|Hereditary_cancer-predisposing_syndrome|Hirschsprung_disease|Multiple_endocrine_neoplasia, _type_2|not_specified|MONDO:MONDO:0008234, MeSH:D018813, MedGen:C0025268, OMIM:171400, Orphanet:ORPHA247698, SNOMED_CT:61808009|MONDO:MONDO:0015356, MedGen:C0027672, Orphanet:ORPHA140162, SNOMED_CT:699346009|MONDO:MONDO:0018309, MeSH:D006627, MedGen:C0019569, OMIM:PS14…
ERR1840757	chr10	43609102	43609110	11	43609103	43609103	Medullary_thyroid_carcinoma|Multiple_endocrine_neoplasia, _type_1|Multiple_endocrine_neoplasia, _type_2b|Multiple_endocrine_neoplasia, _type_2a|Multiple_endocrine_neoplasia, _type_4|Hirschsprung_disease|Multiple_endocrine_neoplasia, _type_2|none_provided|not_provided|Human_Phenotype_Ontology:HP:0002865, MONDO:MONDO:0015277, MeSH:C536914, MedGen:C0238462, Orphanet:ORPHA1332, SNOMED_CT:255032005|MO…
ERR1840757	chr10	43609102	43609110	11	43609104	43609104	Hereditary_cancer-predisposing_syndrome|Multiple_endocrine_neoplasia, _type_2|MULTIPLE_ENDOCRINE_NEOPLASIA, _TYPE_IIA, _WITH_HIRSCHSPRUNG_DISEASE|MONDO:MONDO:0015356, MedGen:C0027672, Orphanet:ORPHA140162, SNOMED_CT:699346009|MONDO:MONDO:0019003, MedGen:C4048306, Orphanet:ORPHA653, SNOMED_CT:61808009|MedGen:C4016286|Pathogenic
ERR1840757	chr13	78475310	78475317	15	78475316	78475316	Waardenburg_syndrome_type_4A|Hirschsprung_disease_2|MONDO:MONDO:0010192, MedGen:C1848519, OMIM:277580|MONDO:MONDO:0010833, MedGen:C1838564, OMIM:600155|Pathogenic
ERR1840757	chrX	153132106	153132115	25	153132113	153132114	Hydrocephalus, _X-linked, _with_hirschsprung_disease|MedGen:C4017784|Pathogenic
ERR1840758	chr1	21546499	21546503	42	21546501	21546501	Hirschsprung_disease, _cardiac_defects, _and_autonomic_dysfunction|MONDO:MONDO:0013473, MedGen:C3151237, OMIM:613870|Pathogenic
ERR1840758	chr22	38369492	38369496	20	38369492	38369503	Peripheral_demyelinating_neuropathy, _central_dysmyelination, _Waardenburg_syndrome, _and_Hirschsprung_disease|MONDO:MONDO:0012198, MedGen:C1836727, OMIM:609136, Orphanet:ORPHA163746|Pathogenic
ERR1840758	chr22	38369497	38369499	21	38369492	38369503	Peripheral_demyelinating_neuropathy, _central_dysmyelination, _Waardenburg_syndrome, _and_Hirschsprung_disease|MONDO:MONDO:0012198, MedGen:C1836727, OMIM:609136, Orphanet:ORPHA163746|Pathogenic
ERR1840758	chr22	38369500	38369505	22	38369492	38369503	Peripheral_demyelinating_neuropathy, _central_dysmyelination, _Waardenburg_syndrome, _and_Hirschsprung_disease|MONDO:MONDO:0012198, MedGen:C1836727, OMIM:609136, Orphanet:ORPHA163746|Pathogenic
ERR1840758	chr22	38369724	38369733	47	38369728	38369728	Peripheral_demyelinating_neuropathy, _central_dysmyelination, _Waardenburg_syndrome, _and_Hirschsprung_disease|MONDO:MONDO:0012198, MedGen:C1836727, OMIM:609136, Orphanet:ORPHA163746|Pathogenic
ERR1840758	chr22	38369961	38369961	107	38369962	38369962	Peripheral_demyelinating_neuropathy, _central_dysmyelination, _Waardenburg_syndrome, _and_Hirschsprung_disease|MONDO:MONDO:0012198, MedGen:C1836727, OMIM:609136, Orphanet:ORPHA163746|Pathogenic
ERR1840758	chr22	38369962	38369964	110	38369962	38369962	Peripheral_demyelinating_neuropathy, _central_dysmyelination, _Waardenburg_syndrome, _and_Hirschsprung_disease|MONDO:MONDO:0012198, MedGen:C1836727, OMIM:609136, Orphanet:ORPHA163746|Pathogenic
ERR1840758	chr22	38369962	38369964	110	38369964	38369964	Peripheral_demyelinating_neuropathy, _central_dysmyelination, _Waardenburg_syndrome, _and_Hirschsprung_disease|MONDO:MONDO:0012198, MedGen:C1836727, OMIM:609136, Orphanet:ORPHA163746|Pathogenic
ERR1840758	chr22	38369987	38369987	139	38369988	38369988	Peripheral_demyelinating_neuropathy, _central_dysmyelination, _Waardenburg_syndrome, _and_Hirschsprung_disease|MONDO:MONDO:0012198, MedGen:C1836727, OMIM:609136, Orphanet:ORPHA163746|Pathogenic
ERR1840758	chr22	38369988	38369988	141	38369988	38369988	Peripheral_demyelinating_neuropathy, _central_dysmyelination, _Waardenburg_syndrome, _and_Hirschsprung_disease|MONDO:MONDO:0012198, MedGen:C1836727, OMIM:609136, Orphanet:ORPHA163746|Pathogenic
ERR1840758	chr22	38370150	38370150	188	38370151	38370151	Peripheral_demyelinating_neuropathy, _central_dysmyelination, _Waardenburg_syndrome, _and_Hirschsprung_disease|MONDO:MONDO:0012198, MedGen:C1836727, OMIM:609136, Orphanet:ORPHA163746|Pathogenic
ERR1840758	chr22	38370151	38370152	185	38370151	38370151	Peripheral_demyelinating_neuropathy, _central_dysmyelination, _Waardenburg_syndrome, _and_Hirschsprung_disease|MONDO:MONDO:0012198, MedGen:C1836727, OMIM:609136, Orphanet:ORPHA163746|Pathogenic
ERR1840758	chr22	38370154	38370154	180	38370155	38370155	Peripheral_demyelinating_neuropathy, _central_dysmyelination, _Waardenburg_syndrome, _and_Hirschsprung_disease|MONDO:MONDO:0012198, MedGen:C1836727, OMIM:609136, Orphanet:ORPHA163746|Pathogenic
ERR1840758	chr22	38370155	38370155	178	38370155	38370155	Peripheral_demyelinating_neuropathy, _central_dysmyelination, _Waardenburg_syndrome, _and_Hirschsprung_disease|MONDO:MONDO:0012198, MedGen:C1836727, OMIM:609136, Orphanet:ORPHA163746|Pathogenic
ERR1840758	chr22	38379365	38379367	14	38379367	38379367	Peripheral_demyelinating_neuropathy, _central_dysmyelination, _Waardenburg_syndrome, _and_Hirschsprung_disease|MONDO:MONDO:0012198, MedGen:C1836727, OMIM:609136, Orphanet:ORPHA163746|Pathogenic
ERR1840758	chr4	41749373	41749375	81	41749374	41749374	Neuroblastoma_with_Hirschsprung_disease|MedGen:C2751683|Pathogenic
ERR1840758	chr10	43600483	43600488	53	43600486	43600486	Hirschsprung_disease_1|MONDO:MONDO:0007723, MedGen:C3888239, OMIM:142623|Pathogenic
ERR1840758	chr10	43604610	43604611	53	43604611	43604611	Hirschsprung_disease_1|MONDO:MONDO:0007723, MedGen:C3888239, OMIM:142623|Pathogenic
ERR1840758	chr10	43606665	43606667	68	43606667	43606668	Sensorineural_hearing_loss|Hirschsprung_disease_1|Human_Phenotype_Ontology:HP:0000374, Human_Phenotype_Ontology:HP:0000407, Human_Phenotype_Ontology:HP:0001753, Human_Phenotype_Ontology:HP:0001916, Human_Phenotype_Ontology:HP:0008538, Human_Phenotype_Ontology:HP:0008553, Human_Phenotype_Ontology:HP:0008565, Human_Phenotype_Ontology:HP:0008576, Human_Phenotype_Ontology:HP:0008611, Human_Phenotype_…
ERR1840758	chr10	43609068	43609069	5	43609069	43609069	Familial_medullary_thyroid_carcinoma|Hereditary_cancer-predisposing_syndrome|Hirschsprung_disease|Multiple_endocrine_neoplasia, _type_2|not_provided|MONDO:MONDO:0007958, MedGen:C1833921, OMIM:155240, Orphanet:ORPHA99361|MONDO:MONDO:0015356, MedGen:C0027672, Orphanet:ORPHA140162, SNOMED_CT:699346009|MONDO:MONDO:0018309, MeSH:D006627, MedGen:C0019569, OMIM:PS142623, Orphanet:ORPHA388, SNOMED_CT:204…
ERR1840758	chr10	43609093	43609100	6	43609096	43609096	Pheochromocytoma|Hirschsprung_disease_1|Familial_medullary_thyroid_carcinoma|Multiple_endocrine_neoplasia, _type_2b|Multiple_endocrine_neoplasia, _type_2a|Congenital_central_hypoventilation|Multiple_endocrine_neoplasia, _type_2|none_provided|not_provided|Human_Phenotype_Ontology:HP:0002666, MONDO:MONDO:0008233, MedGen:C0031511, OMIM:171300|MONDO:MONDO:0007723, MedGen:C3888239, OMIM:142623|MONDO:M…
ERR1840758	chr10	43609101	43609101	5	43609102	43609102	Multiple_endocrine_neoplasia, _type_2a|Hereditary_cancer-predisposing_syndrome|Hirschsprung_disease|Multiple_endocrine_neoplasia, _type_2|not_provided|MONDO:MONDO:0008234, MeSH:D018813, MedGen:C0025268, OMIM:171400, Orphanet:ORPHA247698, SNOMED_CT:61808009|MONDO:MONDO:0015356, MedGen:C0027672, Orphanet:ORPHA140162, SNOMED_CT:699346009|MONDO:MONDO:0018309, MeSH:D006627, MedGen:C0019569, OMIM:PS142…
ERR1840758	chr10	43609101	43609101	5	43609102	43609102	Multiple_endocrine_neoplasia, _type_2a|Hereditary_cancer-predisposing_syndrome|Hirschsprung_disease|Multiple_endocrine_neoplasia, _type_2|not_specified|MONDO:MONDO:0008234, MeSH:D018813, MedGen:C0025268, OMIM:171400, Orphanet:ORPHA247698, SNOMED_CT:61808009|MONDO:MONDO:0015356, MedGen:C0027672, Orphanet:ORPHA140162, SNOMED_CT:699346009|MONDO:MONDO:0018309, MeSH:D006627, MedGen:C0019569, OMIM:PS14…
ERR1840758	chr13	78475313	78475317	20	78475316	78475316	Waardenburg_syndrome_type_4A|Hirschsprung_disease_2|MONDO:MONDO:0010192, MedGen:C1848519, OMIM:277580|MONDO:MONDO:0010833, MedGen:C1838564, OMIM:600155|Pathogenic
ERR1840758	chrX	153132113	153132113	72	153132113	153132114	Hydrocephalus, _X-linked, _with_hirschsprung_disease|MedGen:C4017784|Pathogenic
ERR1840762	chr1	21546500	21546501	38	21546501	21546501	Hirschsprung_disease, _cardiac_defects, _and_autonomic_dysfunction|MONDO:MONDO:0013473, MedGen:C3151237, OMIM:613870|Pathogenic
ERR1840762	chr22	38369491	38369495	23	38369492	38369503	Peripheral_demyelinating_neuropathy, _central_dysmyelination, _Waardenburg_syndrome, _and_Hirschsprung_disease|MONDO:MONDO:0012198, MedGen:C1836727, OMIM:609136, Orphanet:ORPHA163746|Pathogenic
ERR1840762	chr22	38369496	38369499	24	38369492	38369503	Peripheral_demyelinating_neuropathy, _central_dysmyelination, _Waardenburg_syndrome, _and_Hirschsprung_disease|MONDO:MONDO:0012198, MedGen:C1836727, OMIM:609136, Orphanet:ORPHA163746|Pathogenic
ERR1840762	chr22	38369500	38369502	25	38369492	38369503	Peripheral_demyelinating_neuropathy, _central_dysmyelination, _Waardenburg_syndrome, _and_Hirschsprung_disease|MONDO:MONDO:0012198, MedGen:C1836727, OMIM:609136, Orphanet:ORPHA163746|Pathogenic
ERR1840762	chr22	38369961	38369961	71	38369962	38369962	Peripheral_demyelinating_neuropathy, _central_dysmyelination, _Waardenburg_syndrome, _and_Hirschsprung_disease|MONDO:MONDO:0012198, MedGen:C1836727, OMIM:609136, Orphanet:ORPHA163746|Pathogenic
ERR1840762	chr22	38369962	38369963	72	38369962	38369962	Peripheral_demyelinating_neuropathy, _central_dysmyelination, _Waardenburg_syndrome, _and_Hirschsprung_disease|MONDO:MONDO:0012198, MedGen:C1836727, OMIM:609136, Orphanet:ORPHA163746|Pathogenic
ERR1840762	chr22	38369962	38369963	72	38369964	38369964	Peripheral_demyelinating_neuropathy, _central_dysmyelination, _Waardenburg_syndrome, _and_Hirschsprung_disease|MONDO:MONDO:0012198, MedGen:C1836727, OMIM:609136, Orphanet:ORPHA163746|Pathogenic
ERR1840762	chr22	38369964	38369965	70	38369964	38369964	Peripheral_demyelinating_neuropathy, _central_dysmyelination, _Waardenburg_syndrome, _and_Hirschsprung_disease|MONDO:MONDO:0012198, MedGen:C1836727, OMIM:609136, Orphanet:ORPHA163746|Pathogenic
ERR1840762	chr22	38369986	38369988	89	38369988	38369988	Peripheral_demyelinating_neuropathy, _central_dysmyelination, _Waardenburg_syndrome, _and_Hirschsprung_disease|MONDO:MONDO:0012198, MedGen:C1836727, OMIM:609136, Orphanet:ORPHA163746|Pathogenic
ERR1840762	chr22	38370150	38370150	135	38370151	38370151	Peripheral_demyelinating_neuropathy, _central_dysmyelination, _Waardenburg_syndrome, _and_Hirschsprung_disease|MONDO:MONDO:0012198, MedGen:C1836727, OMIM:609136, Orphanet:ORPHA163746|Pathogenic
ERR1840762	chr22	38370151	38370151	133	38370151	38370151	Peripheral_demyelinating_neuropathy, _central_dysmyelination, _Waardenburg_syndrome, _and_Hirschsprung_disease|MONDO:MONDO:0012198, MedGen:C1836727, OMIM:609136, Orphanet:ORPHA163746|Pathogenic
ERR1840762	chr22	38370154	38370155	130	38370155	38370155	Peripheral_demyelinating_neuropathy, _central_dysmyelination, _Waardenburg_syndrome, _and_Hirschsprung_disease|MONDO:MONDO:0012198, MedGen:C1836727, OMIM:609136, Orphanet:ORPHA163746|Pathogenic
ERR1840762	chr22	38379365	38379371	16	38379367	38379367	Peripheral_demyelinating_neuropathy, _central_dysmyelination, _Waardenburg_syndrome, _and_Hirschsprung_disease|MONDO:MONDO:0012198, MedGen:C1836727, OMIM:609136, Orphanet:ORPHA163746|Pathogenic
ERR1840762	chr4	41749372	41749375	76	41749374	41749374	Neuroblastoma_with_Hirschsprung_disease|MedGen:C2751683|Pathogenic
ERR1840762	chr10	43595943	43595944	104	43595944	43595944	Hirschsprung_disease|MONDO:MONDO:0018309, MeSH:D006627, MedGen:C0019569, OMIM:PS142623, Orphanet:ORPHA388, SNOMED_CT:204739008|Pathogenic
ERR1840762	chr10	43600632	43600637	45	43600634	43600634	Hirschsprung_disease|MONDO:MONDO:0018309, MeSH:D006627, MedGen:C0019569, OMIM:PS142623, Orphanet:ORPHA388, SNOMED_CT:204739008|Pathogenic
ERR1840762	chr10	43604610	43604614	46	43604611	43604611	Hirschsprung_disease_1|MONDO:MONDO:0007723, MedGen:C3888239, OMIM:142623|Pathogenic
ERR1840762	chr10	43606664	43606667	31	43606667	43606668	Sensorineural_hearing_loss|Hirschsprung_disease_1|Human_Phenotype_Ontology:HP:0000374, Human_Phenotype_Ontology:HP:0000407, Human_Phenotype_Ontology:HP:0001753, Human_Phenotype_Ontology:HP:0001916, Human_Phenotype_Ontology:HP:0008538, Human_Phenotype_Ontology:HP:0008553, Human_Phenotype_Ontology:HP:0008565, Human_Phenotype_Ontology:HP:0008576, Human_Phenotype_Ontology:HP:0008611, Human_Phenotype_…
ERR1840762	chr10	43609059	43609069	6	43609069	43609069	Familial_medullary_thyroid_carcinoma|Hereditary_cancer-predisposing_syndrome|Hirschsprung_disease|Multiple_endocrine_neoplasia, _type_2|not_provided|MONDO:MONDO:0007958, MedGen:C1833921, OMIM:155240, Orphanet:ORPHA99361|MONDO:MONDO:0015356, MedGen:C0027672, Orphanet:ORPHA140162, SNOMED_CT:699346009|MONDO:MONDO:0018309, MeSH:D006627, MedGen:C0019569, OMIM:PS142623, Orphanet:ORPHA388, SNOMED_CT:204…
ERR1840762	chr13	78475314	78475316	39	78475316	78475316	Waardenburg_syndrome_type_4A|Hirschsprung_disease_2|MONDO:MONDO:0010192, MedGen:C1848519, OMIM:277580|MONDO:MONDO:0010833, MedGen:C1838564, OMIM:600155|Pathogenic
ERR1840762	chrX	153132106	153132114	18	153132113	153132114	Hydrocephalus, _X-linked, _with_hirschsprung_disease|MedGen:C4017784|Pathogenic
ERR1840763	chr1	21546499	21546501	32	21546501	21546501	Hirschsprung_disease, _cardiac_defects, _and_autonomic_dysfunction|MONDO:MONDO:0013473, MedGen:C3151237, OMIM:613870|Pathogenic
ERR1840763	chr4	41749371	41749373	76	41749374	41749374	Neuroblastoma_with_Hirschsprung_disease|MedGen:C2751683|Pathogenic
ERR1840763	chr10	43595943	43595944	84	43595944	43595944	Hirschsprung_disease|MONDO:MONDO:0018309, MeSH:D006627, MedGen:C0019569, OMIM:PS142623, Orphanet:ORPHA388, SNOMED_CT:204739008|Pathogenic
ERR1840763	chr10	43600629	43600635	48	43600634	43600634	Hirschsprung_disease|MONDO:MONDO:0018309, MeSH:D006627, MedGen:C0019569, OMIM:PS142623, Orphanet:ORPHA388, SNOMED_CT:204739008|Pathogenic
ERR1840763	chr10	43606664	43606667	33	43606667	43606668	Sensorineural_hearing_loss|Hirschsprung_disease_1|Human_Phenotype_Ontology:HP:0000374, Human_Phenotype_Ontology:HP:0000407, Human_Phenotype_Ontology:HP:0001753, Human_Phenotype_Ontology:HP:0001916, Human_Phenotype_Ontology:HP:0008538, Human_Phenotype_Ontology:HP:0008553, Human_Phenotype_Ontology:HP:0008565, Human_Phenotype_Ontology:HP:0008576, Human_Phenotype_Ontology:HP:0008611, Human_Phenotype_…
ERR1840763	chr10	43609063	43609082	7	43609069	43609069	Familial_medullary_thyroid_carcinoma|Hereditary_cancer-predisposing_syndrome|Hirschsprung_disease|Multiple_endocrine_neoplasia, _type_2|not_provided|MONDO:MONDO:0007958, MedGen:C1833921, OMIM:155240, Orphanet:ORPHA99361|MONDO:MONDO:0015356, MedGen:C0027672, Orphanet:ORPHA140162, SNOMED_CT:699346009|MONDO:MONDO:0018309, MeSH:D006627, MedGen:C0019569, OMIM:PS142623, Orphanet:ORPHA388, SNOMED_CT:204…
ERR1840763	chr10	43609091	43609100	5	43609096	43609096	Pheochromocytoma|Hirschsprung_disease_1|Familial_medullary_thyroid_carcinoma|Multiple_endocrine_neoplasia, _type_2b|Multiple_endocrine_neoplasia, _type_2a|Congenital_central_hypoventilation|Multiple_endocrine_neoplasia, _type_2|none_provided|not_provided|Human_Phenotype_Ontology:HP:0002666, MONDO:MONDO:0008233, MedGen:C0031511, OMIM:171300|MONDO:MONDO:0007723, MedGen:C3888239, OMIM:142623|MONDO:M…
ERR1840763	chr10	43609101	43609107	6	43609102	43609102	Multiple_endocrine_neoplasia, _type_2a|Hereditary_cancer-predisposing_syndrome|Hirschsprung_disease|Multiple_endocrine_neoplasia, _type_2|not_provided|MONDO:MONDO:0008234, MeSH:D018813, MedGen:C0025268, OMIM:171400, Orphanet:ORPHA247698, SNOMED_CT:61808009|MONDO:MONDO:0015356, MedGen:C0027672, Orphanet:ORPHA140162, SNOMED_CT:699346009|MONDO:MONDO:0018309, MeSH:D006627, MedGen:C0019569, OMIM:PS142…
ERR1840763	chr10	43609101	43609107	6	43609102	43609102	Multiple_endocrine_neoplasia, _type_2a|Hereditary_cancer-predisposing_syndrome|Hirschsprung_disease|Multiple_endocrine_neoplasia, _type_2|not_specified|MONDO:MONDO:0008234, MeSH:D018813, MedGen:C0025268, OMIM:171400, Orphanet:ORPHA247698, SNOMED_CT:61808009|MONDO:MONDO:0015356, MedGen:C0027672, Orphanet:ORPHA140162, SNOMED_CT:699346009|MONDO:MONDO:0018309, MeSH:D006627, MedGen:C0019569, OMIM:PS14…
ERR1840763	chr10	43609101	43609107	6	43609103	43609103	Medullary_thyroid_carcinoma|Multiple_endocrine_neoplasia, _type_1|Multiple_endocrine_neoplasia, _type_2b|Multiple_endocrine_neoplasia, _type_2a|Multiple_endocrine_neoplasia, _type_4|Hirschsprung_disease|Multiple_endocrine_neoplasia, _type_2|none_provided|not_provided|Human_Phenotype_Ontology:HP:0002865, MONDO:MONDO:0015277, MeSH:C536914, MedGen:C0238462, Orphanet:ORPHA1332, SNOMED_CT:255032005|MO…
ERR1840763	chr10	43609101	43609107	6	43609104	43609104	Hereditary_cancer-predisposing_syndrome|Multiple_endocrine_neoplasia, _type_2|MULTIPLE_ENDOCRINE_NEOPLASIA, _TYPE_IIA, _WITH_HIRSCHSPRUNG_DISEASE|MONDO:MONDO:0015356, MedGen:C0027672, Orphanet:ORPHA140162, SNOMED_CT:699346009|MONDO:MONDO:0019003, MedGen:C4048306, Orphanet:ORPHA653, SNOMED_CT:61808009|MedGen:C4016286|Pathogenic
ERR1840763	chr13	78475310	78475328	23	78475316	78475316	Waardenburg_syndrome_type_4A|Hirschsprung_disease_2|MONDO:MONDO:0010192, MedGen:C1848519, OMIM:277580|MONDO:MONDO:0010833, MedGen:C1838564, OMIM:600155|Pathogenic
ERR1840763	chrX	153132113	153132114	39	153132113	153132114	Hydrocephalus, _X-linked, _with_hirschsprung_disease|MedGen:C4017784|Pathogenic
ERR1840763	chrX	153132279	153132281	36	153132281	153132281	Hydrocephalus, _X-linked, _with_hirschsprung_disease|MedGen:C4017784|Pathogenic
ERR1840764	chr22	38369490	38369496	15	38369492	38369503	Peripheral_demyelinating_neuropathy, _central_dysmyelination, _Waardenburg_syndrome, _and_Hirschsprung_disease|MONDO:MONDO:0012198, MedGen:C1836727, OMIM:609136, Orphanet:ORPHA163746|Pathogenic
ERR1840764	chr22	38369497	38369497	14	38369492	38369503	Peripheral_demyelinating_neuropathy, _central_dysmyelination, _Waardenburg_syndrome, _and_Hirschsprung_disease|MONDO:MONDO:0012198, MedGen:C1836727, OMIM:609136, Orphanet:ORPHA163746|Pathogenic
ERR1840764	chr22	38369498	38369501	15	38369492	38369503	Peripheral_demyelinating_neuropathy, _central_dysmyelination, _Waardenburg_syndrome, _and_Hirschsprung_disease|MONDO:MONDO:0012198, MedGen:C1836727, OMIM:609136, Orphanet:ORPHA163746|Pathogenic
ERR1840764	chr22	38369502	38369508	16	38369492	38369503	Peripheral_demyelinating_neuropathy, _central_dysmyelination, _Waardenburg_syndrome, _and_Hirschsprung_disease|MONDO:MONDO:0012198, MedGen:C1836727, OMIM:609136, Orphanet:ORPHA163746|Pathogenic
ERR1840764	chr22	38369960	38369961	74	38369962	38369962	Peripheral_demyelinating_neuropathy, _central_dysmyelination, _Waardenburg_syndrome, _and_Hirschsprung_disease|MONDO:MONDO:0012198, MedGen:C1836727, OMIM:609136, Orphanet:ORPHA163746|Pathogenic
ERR1840764	chr22	38369962	38369962	75	38369962	38369962	Peripheral_demyelinating_neuropathy, _central_dysmyelination, _Waardenburg_syndrome, _and_Hirschsprung_disease|MONDO:MONDO:0012198, MedGen:C1836727, OMIM:609136, Orphanet:ORPHA163746|Pathogenic
ERR1840764	chr22	38369963	38369963	76	38369964	38369964	Peripheral_demyelinating_neuropathy, _central_dysmyelination, _Waardenburg_syndrome, _and_Hirschsprung_disease|MONDO:MONDO:0012198, MedGen:C1836727, OMIM:609136, Orphanet:ORPHA163746|Pathogenic
ERR1840764	chr22	38369964	38369964	77	38369964	38369964	Peripheral_demyelinating_neuropathy, _central_dysmyelination, _Waardenburg_syndrome, _and_Hirschsprung_disease|MONDO:MONDO:0012198, MedGen:C1836727, OMIM:609136, Orphanet:ORPHA163746|Pathogenic
ERR1840764	chr22	38369986	38369988	97	38369988	38369988	Peripheral_demyelinating_neuropathy, _central_dysmyelination, _Waardenburg_syndrome, _and_Hirschsprung_disease|MONDO:MONDO:0012198, MedGen:C1836727, OMIM:609136, Orphanet:ORPHA163746|Pathogenic
ERR1840764	chr22	38370150	38370150	135	38370151	38370151	Peripheral_demyelinating_neuropathy, _central_dysmyelination, _Waardenburg_syndrome, _and_Hirschsprung_disease|MONDO:MONDO:0012198, MedGen:C1836727, OMIM:609136, Orphanet:ORPHA163746|Pathogenic
ERR1840764	chr22	38370151	38370151	133	38370151	38370151	Peripheral_demyelinating_neuropathy, _central_dysmyelination, _Waardenburg_syndrome, _and_Hirschsprung_disease|MONDO:MONDO:0012198, MedGen:C1836727, OMIM:609136, Orphanet:ORPHA163746|Pathogenic
ERR1840764	chr22	38370154	38370155	132	38370155	38370155	Peripheral_demyelinating_neuropathy, _central_dysmyelination, _Waardenburg_syndrome, _and_Hirschsprung_disease|MONDO:MONDO:0012198, MedGen:C1836727, OMIM:609136, Orphanet:ORPHA163746|Pathogenic
ERR1840764	chr22	38379366	38379366	23	38379367	38379367	Peripheral_demyelinating_neuropathy, _central_dysmyelination, _Waardenburg_syndrome, _and_Hirschsprung_disease|MONDO:MONDO:0012198, MedGen:C1836727, OMIM:609136, Orphanet:ORPHA163746|Pathogenic
ERR1840764	chr22	38379367	38379367	22	38379367	38379367	Peripheral_demyelinating_neuropathy, _central_dysmyelination, _Waardenburg_syndrome, _and_Hirschsprung_disease|MONDO:MONDO:0012198, MedGen:C1836727, OMIM:609136, Orphanet:ORPHA163746|Pathogenic
ERR1840764	chr4	41749372	41749374	66	41749374	41749374	Neuroblastoma_with_Hirschsprung_disease|MedGen:C2751683|Pathogenic
ERR1840764	chr10	43595943	43595944	106	43595944	43595944	Hirschsprung_disease|MONDO:MONDO:0018309, MeSH:D006627, MedGen:C0019569, OMIM:PS142623, Orphanet:ORPHA388, SNOMED_CT:204739008|Pathogenic
ERR1840764	chr10	43600632	43600634	73	43600634	43600634	Hirschsprung_disease|MONDO:MONDO:0018309, MeSH:D006627, MedGen:C0019569, OMIM:PS142623, Orphanet:ORPHA388, SNOMED_CT:204739008|Pathogenic
ERR1840764	chr10	43604610	43604611	39	43604611	43604611	Hirschsprung_disease_1|MONDO:MONDO:0007723, MedGen:C3888239, OMIM:142623|Pathogenic
ERR1840764	chr10	43606667	43606668	42	43606667	43606668	Sensorineural_hearing_loss|Hirschsprung_disease_1|Human_Phenotype_Ontology:HP:0000374, Human_Phenotype_Ontology:HP:0000407, Human_Phenotype_Ontology:HP:0001753, Human_Phenotype_Ontology:HP:0001916, Human_Phenotype_Ontology:HP:0008538, Human_Phenotype_Ontology:HP:0008553, Human_Phenotype_Ontology:HP:0008565, Human_Phenotype_Ontology:HP:0008576, Human_Phenotype_Ontology:HP:0008611, Human_Phenotype_…
ERR1840764	chr10	43609059	43609082	15	43609069	43609069	Familial_medullary_thyroid_carcinoma|Hereditary_cancer-predisposing_syndrome|Hirschsprung_disease|Multiple_endocrine_neoplasia, _type_2|not_provided|MONDO:MONDO:0007958, MedGen:C1833921, OMIM:155240, Orphanet:ORPHA99361|MONDO:MONDO:0015356, MedGen:C0027672, Orphanet:ORPHA140162, SNOMED_CT:699346009|MONDO:MONDO:0018309, MeSH:D006627, MedGen:C0019569, OMIM:PS142623, Orphanet:ORPHA388, SNOMED_CT:204…
ERR1840764	chr10	43609083	43609098	16	43609096	43609096	Pheochromocytoma|Hirschsprung_disease_1|Familial_medullary_thyroid_carcinoma|Multiple_endocrine_neoplasia, _type_2b|Multiple_endocrine_neoplasia, _type_2a|Congenital_central_hypoventilation|Multiple_endocrine_neoplasia, _type_2|none_provided|not_provided|Human_Phenotype_Ontology:HP:0002666, MONDO:MONDO:0008233, MedGen:C0031511, OMIM:171300|MONDO:MONDO:0007723, MedGen:C3888239, OMIM:142623|MONDO:M…
ERR1840764	chr10	43609100	43609104	16	43609102	43609102	Multiple_endocrine_neoplasia, _type_2a|Hereditary_cancer-predisposing_syndrome|Hirschsprung_disease|Multiple_endocrine_neoplasia, _type_2|not_provided|MONDO:MONDO:0008234, MeSH:D018813, MedGen:C0025268, OMIM:171400, Orphanet:ORPHA247698, SNOMED_CT:61808009|MONDO:MONDO:0015356, MedGen:C0027672, Orphanet:ORPHA140162, SNOMED_CT:699346009|MONDO:MONDO:0018309, MeSH:D006627, MedGen:C0019569, OMIM:PS142…
ERR1840764	chr10	43609100	43609104	16	43609102	43609102	Multiple_endocrine_neoplasia, _type_2a|Hereditary_cancer-predisposing_syndrome|Hirschsprung_disease|Multiple_endocrine_neoplasia, _type_2|not_specified|MONDO:MONDO:0008234, MeSH:D018813, MedGen:C0025268, OMIM:171400, Orphanet:ORPHA247698, SNOMED_CT:61808009|MONDO:MONDO:0015356, MedGen:C0027672, Orphanet:ORPHA140162, SNOMED_CT:699346009|MONDO:MONDO:0018309, MeSH:D006627, MedGen:C0019569, OMIM:PS14…
ERR1840764	chr10	43609100	43609104	16	43609103	43609103	Medullary_thyroid_carcinoma|Multiple_endocrine_neoplasia, _type_1|Multiple_endocrine_neoplasia, _type_2b|Multiple_endocrine_neoplasia, _type_2a|Multiple_endocrine_neoplasia, _type_4|Hirschsprung_disease|Multiple_endocrine_neoplasia, _type_2|none_provided|not_provided|Human_Phenotype_Ontology:HP:0002865, MONDO:MONDO:0015277, MeSH:C536914, MedGen:C0238462, Orphanet:ORPHA1332, SNOMED_CT:255032005|MO…
ERR1840764	chr10	43609100	43609104	16	43609104	43609104	Hereditary_cancer-predisposing_syndrome|Multiple_endocrine_neoplasia, _type_2|MULTIPLE_ENDOCRINE_NEOPLASIA, _TYPE_IIA, _WITH_HIRSCHSPRUNG_DISEASE|MONDO:MONDO:0015356, MedGen:C0027672, Orphanet:ORPHA140162, SNOMED_CT:699346009|MONDO:MONDO:0019003, MedGen:C4048306, Orphanet:ORPHA653, SNOMED_CT:61808009|MedGen:C4016286|Pathogenic
ERR1840764	chr10	43619179	43619180	73	43619180	43619180	Hirschsprung_disease|MONDO:MONDO:0018309, MeSH:D006627, MedGen:C0019569, OMIM:PS142623, Orphanet:ORPHA388, SNOMED_CT:204739008|Pathogenic
ERR1840764	chr10	43622121	43622126	64	43622126	43622126	Hirschsprung_disease|MONDO:MONDO:0018309, MeSH:D006627, MedGen:C0019569, OMIM:PS142623, Orphanet:ORPHA388, SNOMED_CT:204739008|Pathogenic
ERR1840764	chr13	78475308	78475335	21	78475316	78475316	Waardenburg_syndrome_type_4A|Hirschsprung_disease_2|MONDO:MONDO:0010192, MedGen:C1848519, OMIM:277580|MONDO:MONDO:0010833, MedGen:C1838564, OMIM:600155|Pathogenic
ERR1840764	chrX	153132112	153132114	52	153132113	153132114	Hydrocephalus, _X-linked, _with_hirschsprung_disease|MedGen:C4017784|Pathogenic
ERR1840765	chr10	43595911	43595944	8	43595944	43595944	Hirschsprung_disease|MONDO:MONDO:0018309, MeSH:D006627, MedGen:C0019569, OMIM:PS142623, Orphanet:ORPHA388, SNOMED_CT:204739008|Pathogenic
ERR1840765	chr10	43604608	43604613	12	43604611	43604611	Hirschsprung_disease_1|MONDO:MONDO:0007723, MedGen:C3888239, OMIM:142623|Pathogenic
ERR1840765	chr10	43609059	43609083	10	43609069	43609069	Familial_medullary_thyroid_carcinoma|Hereditary_cancer-predisposing_syndrome|Hirschsprung_disease|Multiple_endocrine_neoplasia, _type_2|not_provided|MONDO:MONDO:0007958, MedGen:C1833921, OMIM:155240, Orphanet:ORPHA99361|MONDO:MONDO:0015356, MedGen:C0027672, Orphanet:ORPHA140162, SNOMED_CT:699346009|MONDO:MONDO:0018309, MeSH:D006627, MedGen:C0019569, OMIM:PS142623, Orphanet:ORPHA388, SNOMED_CT:204…
ERR1840765	chr10	43609084	43609095	9	43609096	43609096	Pheochromocytoma|Hirschsprung_disease_1|Familial_medullary_thyroid_carcinoma|Multiple_endocrine_neoplasia, _type_2b|Multiple_endocrine_neoplasia, _type_2a|Congenital_central_hypoventilation|Multiple_endocrine_neoplasia, _type_2|none_provided|not_provided|Human_Phenotype_Ontology:HP:0002666, MONDO:MONDO:0008233, MedGen:C0031511, OMIM:171300|MONDO:MONDO:0007723, MedGen:C3888239, OMIM:142623|MONDO:M…
ERR1840765	chr10	43609096	43609101	8	43609096	43609096	Pheochromocytoma|Hirschsprung_disease_1|Familial_medullary_thyroid_carcinoma|Multiple_endocrine_neoplasia, _type_2b|Multiple_endocrine_neoplasia, _type_2a|Congenital_central_hypoventilation|Multiple_endocrine_neoplasia, _type_2|none_provided|not_provided|Human_Phenotype_Ontology:HP:0002666, MONDO:MONDO:0008233, MedGen:C0031511, OMIM:171300|MONDO:MONDO:0007723, MedGen:C3888239, OMIM:142623|MONDO:M…
ERR1840765	chr10	43609096	43609101	8	43609102	43609102	Multiple_endocrine_neoplasia, _type_2a|Hereditary_cancer-predisposing_syndrome|Hirschsprung_disease|Multiple_endocrine_neoplasia, _type_2|not_provided|MONDO:MONDO:0008234, MeSH:D018813, MedGen:C0025268, OMIM:171400, Orphanet:ORPHA247698, SNOMED_CT:61808009|MONDO:MONDO:0015356, MedGen:C0027672, Orphanet:ORPHA140162, SNOMED_CT:699346009|MONDO:MONDO:0018309, MeSH:D006627, MedGen:C0019569, OMIM:PS142…
ERR1840765	chr10	43609096	43609101	8	43609102	43609102	Multiple_endocrine_neoplasia, _type_2a|Hereditary_cancer-predisposing_syndrome|Hirschsprung_disease|Multiple_endocrine_neoplasia, _type_2|not_specified|MONDO:MONDO:0008234, MeSH:D018813, MedGen:C0025268, OMIM:171400, Orphanet:ORPHA247698, SNOMED_CT:61808009|MONDO:MONDO:0015356, MedGen:C0027672, Orphanet:ORPHA140162, SNOMED_CT:699346009|MONDO:MONDO:0018309, MeSH:D006627, MedGen:C0019569, OMIM:PS14…
ERR1840765	chr10	43609103	43609106	6	43609103	43609103	Medullary_thyroid_carcinoma|Multiple_endocrine_neoplasia, _type_1|Multiple_endocrine_neoplasia, _type_2b|Multiple_endocrine_neoplasia, _type_2a|Multiple_endocrine_neoplasia, _type_4|Hirschsprung_disease|Multiple_endocrine_neoplasia, _type_2|none_provided|not_provided|Human_Phenotype_Ontology:HP:0002865, MONDO:MONDO:0015277, MeSH:C536914, MedGen:C0238462, Orphanet:ORPHA1332, SNOMED_CT:255032005|MO…
ERR1840765	chr10	43609103	43609106	6	43609104	43609104	Hereditary_cancer-predisposing_syndrome|Multiple_endocrine_neoplasia, _type_2|MULTIPLE_ENDOCRINE_NEOPLASIA, _TYPE_IIA, _WITH_HIRSCHSPRUNG_DISEASE|MONDO:MONDO:0015356, MedGen:C0027672, Orphanet:ORPHA140162, SNOMED_CT:699346009|MONDO:MONDO:0019003, MedGen:C4048306, Orphanet:ORPHA653, SNOMED_CT:61808009|MedGen:C4016286|Pathogenic
ERR1840765	chr10	43619177	43619185	15	43619180	43619180	Hirschsprung_disease|MONDO:MONDO:0018309, MeSH:D006627, MedGen:C0019569, OMIM:PS142623, Orphanet:ORPHA388, SNOMED_CT:204739008|Pathogenic
ERR1840765	chr10	43622119	43622126	34	43622126	43622126	Hirschsprung_disease|MONDO:MONDO:0018309, MeSH:D006627, MedGen:C0019569, OMIM:PS142623, Orphanet:ORPHA388, SNOMED_CT:204739008|Pathogenic
ERR1840765	chrX	153132097	153132112	6	153132113	153132114	Hydrocephalus, _X-linked, _with_hirschsprung_disease|MedGen:C4017784|Pathogenic
ERR1840765	chrX	153132113	153132122	7	153132113	153132114	Hydrocephalus, _X-linked, _with_hirschsprung_disease|MedGen:C4017784|Pathogenic
ERR1840766	chr4	41749353	41749383	5	41749374	41749374	Neuroblastoma_with_Hirschsprung_disease|MedGen:C2751683|Pathogenic
ERR1840766	chr10	43595929	43595943	13	43595944	43595944	Hirschsprung_disease|MONDO:MONDO:0018309, MeSH:D006627, MedGen:C0019569, OMIM:PS142623, Orphanet:ORPHA388, SNOMED_CT:204739008|Pathogenic
ERR1840766	chr10	43597989	43597990	51	43597990	43597990	Hirschsprung_disease_1|Multiple_endocrine_neoplasia, _type_2|MONDO:MONDO:0007723, MedGen:C3888239, OMIM:142623|MONDO:MONDO:0019003, MedGen:C4048306, Orphanet:ORPHA653, SNOMED_CT:61808009|Pathogenic
ERR1840766	chr10	43609046	43609071	15	43609069	43609069	Familial_medullary_thyroid_carcinoma|Hereditary_cancer-predisposing_syndrome|Hirschsprung_disease|Multiple_endocrine_neoplasia, _type_2|not_provided|MONDO:MONDO:0007958, MedGen:C1833921, OMIM:155240, Orphanet:ORPHA99361|MONDO:MONDO:0015356, MedGen:C0027672, Orphanet:ORPHA140162, SNOMED_CT:699346009|MONDO:MONDO:0018309, MeSH:D006627, MedGen:C0019569, OMIM:PS142623, Orphanet:ORPHA388, SNOMED_CT:204…
ERR1840766	chr10	43609095	43609100	9	43609096	43609096	Pheochromocytoma|Hirschsprung_disease_1|Familial_medullary_thyroid_carcinoma|Multiple_endocrine_neoplasia, _type_2b|Multiple_endocrine_neoplasia, _type_2a|Congenital_central_hypoventilation|Multiple_endocrine_neoplasia, _type_2|none_provided|not_provided|Human_Phenotype_Ontology:HP:0002666, MONDO:MONDO:0008233, MedGen:C0031511, OMIM:171300|MONDO:MONDO:0007723, MedGen:C3888239, OMIM:142623|MONDO:M…
ERR1840766	chr10	43609101	43609101	8	43609102	43609102	Multiple_endocrine_neoplasia, _type_2a|Hereditary_cancer-predisposing_syndrome|Hirschsprung_disease|Multiple_endocrine_neoplasia, _type_2|not_provided|MONDO:MONDO:0008234, MeSH:D018813, MedGen:C0025268, OMIM:171400, Orphanet:ORPHA247698, SNOMED_CT:61808009|MONDO:MONDO:0015356, MedGen:C0027672, Orphanet:ORPHA140162, SNOMED_CT:699346009|MONDO:MONDO:0018309, MeSH:D006627, MedGen:C0019569, OMIM:PS142…
ERR1840766	chr10	43609101	43609101	8	43609102	43609102	Multiple_endocrine_neoplasia, _type_2a|Hereditary_cancer-predisposing_syndrome|Hirschsprung_disease|Multiple_endocrine_neoplasia, _type_2|not_specified|MONDO:MONDO:0008234, MeSH:D018813, MedGen:C0025268, OMIM:171400, Orphanet:ORPHA247698, SNOMED_CT:61808009|MONDO:MONDO:0015356, MedGen:C0027672, Orphanet:ORPHA140162, SNOMED_CT:699346009|MONDO:MONDO:0018309, MeSH:D006627, MedGen:C0019569, OMIM:PS14…
ERR1840766	chr10	43609103	43609106	6	43609103	43609103	Medullary_thyroid_carcinoma|Multiple_endocrine_neoplasia, _type_1|Multiple_endocrine_neoplasia, _type_2b|Multiple_endocrine_neoplasia, _type_2a|Multiple_endocrine_neoplasia, _type_4|Hirschsprung_disease|Multiple_endocrine_neoplasia, _type_2|none_provided|not_provided|Human_Phenotype_Ontology:HP:0002865, MONDO:MONDO:0015277, MeSH:C536914, MedGen:C0238462, Orphanet:ORPHA1332, SNOMED_CT:255032005|MO…
ERR1840766	chr10	43609103	43609106	6	43609104	43609104	Hereditary_cancer-predisposing_syndrome|Multiple_endocrine_neoplasia, _type_2|MULTIPLE_ENDOCRINE_NEOPLASIA, _TYPE_IIA, _WITH_HIRSCHSPRUNG_DISEASE|MONDO:MONDO:0015356, MedGen:C0027672, Orphanet:ORPHA140162, SNOMED_CT:699346009|MONDO:MONDO:0019003, MedGen:C4048306, Orphanet:ORPHA653, SNOMED_CT:61808009|MedGen:C4016286|Pathogenic
ERR1840766	chr10	43619179	43619184	32	43619180	43619180	Hirschsprung_disease|MONDO:MONDO:0018309, MeSH:D006627, MedGen:C0019569, OMIM:PS142623, Orphanet:ORPHA388, SNOMED_CT:204739008|Pathogenic
ERR1840766	chr10	43622125	43622126	43	43622126	43622126	Hirschsprung_disease|MONDO:MONDO:0018309, MeSH:D006627, MedGen:C0019569, OMIM:PS142623, Orphanet:ORPHA388, SNOMED_CT:204739008|Pathogenic
ERR1840766	chrX	153132113	153132114	9	153132113	153132114	Hydrocephalus, _X-linked, _with_hirschsprung_disease|MedGen:C4017784|Pathogenic
ERR1840767	chr10	43595942	43595947	11	43595944	43595944	Hirschsprung_disease|MONDO:MONDO:0018309, MeSH:D006627, MedGen:C0019569, OMIM:PS142623, Orphanet:ORPHA388, SNOMED_CT:204739008|Pathogenic
ERR1840767	chr10	43604606	43604611	28	43604611	43604611	Hirschsprung_disease_1|MONDO:MONDO:0007723, MedGen:C3888239, OMIM:142623|Pathogenic
ERR1840767	chr10	43609059	43609068	13	43609069	43609069	Familial_medullary_thyroid_carcinoma|Hereditary_cancer-predisposing_syndrome|Hirschsprung_disease|Multiple_endocrine_neoplasia, _type_2|not_provided|MONDO:MONDO:0007958, MedGen:C1833921, OMIM:155240, Orphanet:ORPHA99361|MONDO:MONDO:0015356, MedGen:C0027672, Orphanet:ORPHA140162, SNOMED_CT:699346009|MONDO:MONDO:0018309, MeSH:D006627, MedGen:C0019569, OMIM:PS142623, Orphanet:ORPHA388, SNOMED_CT:204…
ERR1840767	chr10	43609069	43609070	14	43609069	43609069	Familial_medullary_thyroid_carcinoma|Hereditary_cancer-predisposing_syndrome|Hirschsprung_disease|Multiple_endocrine_neoplasia, _type_2|not_provided|MONDO:MONDO:0007958, MedGen:C1833921, OMIM:155240, Orphanet:ORPHA99361|MONDO:MONDO:0015356, MedGen:C0027672, Orphanet:ORPHA140162, SNOMED_CT:699346009|MONDO:MONDO:0018309, MeSH:D006627, MedGen:C0019569, OMIM:PS142623, Orphanet:ORPHA388, SNOMED_CT:204…
ERR1840767	chr10	43609093	43609100	10	43609096	43609096	Pheochromocytoma|Hirschsprung_disease_1|Familial_medullary_thyroid_carcinoma|Multiple_endocrine_neoplasia, _type_2b|Multiple_endocrine_neoplasia, _type_2a|Congenital_central_hypoventilation|Multiple_endocrine_neoplasia, _type_2|none_provided|not_provided|Human_Phenotype_Ontology:HP:0002666, MONDO:MONDO:0008233, MedGen:C0031511, OMIM:171300|MONDO:MONDO:0007723, MedGen:C3888239, OMIM:142623|MONDO:M…
ERR1840767	chr10	43609101	43609109	9	43609102	43609102	Multiple_endocrine_neoplasia, _type_2a|Hereditary_cancer-predisposing_syndrome|Hirschsprung_disease|Multiple_endocrine_neoplasia, _type_2|not_provided|MONDO:MONDO:0008234, MeSH:D018813, MedGen:C0025268, OMIM:171400, Orphanet:ORPHA247698, SNOMED_CT:61808009|MONDO:MONDO:0015356, MedGen:C0027672, Orphanet:ORPHA140162, SNOMED_CT:699346009|MONDO:MONDO:0018309, MeSH:D006627, MedGen:C0019569, OMIM:PS142…
ERR1840767	chr10	43609101	43609109	9	43609102	43609102	Multiple_endocrine_neoplasia, _type_2a|Hereditary_cancer-predisposing_syndrome|Hirschsprung_disease|Multiple_endocrine_neoplasia, _type_2|not_specified|MONDO:MONDO:0008234, MeSH:D018813, MedGen:C0025268, OMIM:171400, Orphanet:ORPHA247698, SNOMED_CT:61808009|MONDO:MONDO:0015356, MedGen:C0027672, Orphanet:ORPHA140162, SNOMED_CT:699346009|MONDO:MONDO:0018309, MeSH:D006627, MedGen:C0019569, OMIM:PS14…
ERR1840767	chr10	43609101	43609109	9	43609103	43609103	Medullary_thyroid_carcinoma|Multiple_endocrine_neoplasia, _type_1|Multiple_endocrine_neoplasia, _type_2b|Multiple_endocrine_neoplasia, _type_2a|Multiple_endocrine_neoplasia, _type_4|Hirschsprung_disease|Multiple_endocrine_neoplasia, _type_2|none_provided|not_provided|Human_Phenotype_Ontology:HP:0002865, MONDO:MONDO:0015277, MeSH:C536914, MedGen:C0238462, Orphanet:ORPHA1332, SNOMED_CT:255032005|MO…
ERR1840767	chr10	43609101	43609109	9	43609104	43609104	Hereditary_cancer-predisposing_syndrome|Multiple_endocrine_neoplasia, _type_2|MULTIPLE_ENDOCRINE_NEOPLASIA, _TYPE_IIA, _WITH_HIRSCHSPRUNG_DISEASE|MONDO:MONDO:0015356, MedGen:C0027672, Orphanet:ORPHA140162, SNOMED_CT:699346009|MONDO:MONDO:0019003, MedGen:C4048306, Orphanet:ORPHA653, SNOMED_CT:61808009|MedGen:C4016286|Pathogenic
ERR1840767	chr10	43619178	43619181	31	43619180	43619180	Hirschsprung_disease|MONDO:MONDO:0018309, MeSH:D006627, MedGen:C0019569, OMIM:PS142623, Orphanet:ORPHA388, SNOMED_CT:204739008|Pathogenic
ERR1840767	chr10	43622124	43622129	42	43622126	43622126	Hirschsprung_disease|MONDO:MONDO:0018309, MeSH:D006627, MedGen:C0019569, OMIM:PS142623, Orphanet:ORPHA388, SNOMED_CT:204739008|Pathogenic
ERR1840767	chr13	78475314	78475319	22	78475316	78475316	Waardenburg_syndrome_type_4A|Hirschsprung_disease_2|MONDO:MONDO:0010192, MedGen:C1848519, OMIM:277580|MONDO:MONDO:0010833, MedGen:C1838564, OMIM:600155|Pathogenic
ERR1840767	chrX	153132110	153132113	11	153132113	153132114	Hydrocephalus, _X-linked, _with_hirschsprung_disease|MedGen:C4017784|Pathogenic
ERR1840768	chr22	38369725	38369740	7	38369728	38369728	Peripheral_demyelinating_neuropathy, _central_dysmyelination, _Waardenburg_syndrome, _and_Hirschsprung_disease|MONDO:MONDO:0012198, MedGen:C1836727, OMIM:609136, Orphanet:ORPHA163746|Pathogenic
ERR1840768	chr22	38369948	38369970	7	38369962	38369962	Peripheral_demyelinating_neuropathy, _central_dysmyelination, _Waardenburg_syndrome, _and_Hirschsprung_disease|MONDO:MONDO:0012198, MedGen:C1836727, OMIM:609136, Orphanet:ORPHA163746|Pathogenic
ERR1840768	chr22	38369948	38369970	7	38369964	38369964	Peripheral_demyelinating_neuropathy, _central_dysmyelination, _Waardenburg_syndrome, _and_Hirschsprung_disease|MONDO:MONDO:0012198, MedGen:C1836727, OMIM:609136, Orphanet:ORPHA163746|Pathogenic
ERR1840768	chr22	38369985	38369998	7	38369988	38369988	Peripheral_demyelinating_neuropathy, _central_dysmyelination, _Waardenburg_syndrome, _and_Hirschsprung_disease|MONDO:MONDO:0012198, MedGen:C1836727, OMIM:609136, Orphanet:ORPHA163746|Pathogenic
ERR1840768	chr10	43595941	43595952	5	43595944	43595944	Hirschsprung_disease|MONDO:MONDO:0018309, MeSH:D006627, MedGen:C0019569, OMIM:PS142623, Orphanet:ORPHA388, SNOMED_CT:204739008|Pathogenic
ERR1840768	chr10	43604602	43604611	12	43604611	43604611	Hirschsprung_disease_1|MONDO:MONDO:0007723, MedGen:C3888239, OMIM:142623|Pathogenic
ERR1840768	chr10	43606667	43606694	5	43606667	43606668	Sensorineural_hearing_loss|Hirschsprung_disease_1|Human_Phenotype_Ontology:HP:0000374, Human_Phenotype_Ontology:HP:0000407, Human_Phenotype_Ontology:HP:0001753, Human_Phenotype_Ontology:HP:0001916, Human_Phenotype_Ontology:HP:0008538, Human_Phenotype_Ontology:HP:0008553, Human_Phenotype_Ontology:HP:0008565, Human_Phenotype_Ontology:HP:0008576, Human_Phenotype_Ontology:HP:0008611, Human_Phenotype_…
ERR1840768	chr10	43609058	43609078	9	43609069	43609069	Familial_medullary_thyroid_carcinoma|Hereditary_cancer-predisposing_syndrome|Hirschsprung_disease|Multiple_endocrine_neoplasia, _type_2|not_provided|MONDO:MONDO:0007958, MedGen:C1833921, OMIM:155240, Orphanet:ORPHA99361|MONDO:MONDO:0015356, MedGen:C0027672, Orphanet:ORPHA140162, SNOMED_CT:699346009|MONDO:MONDO:0018309, MeSH:D006627, MedGen:C0019569, OMIM:PS142623, Orphanet:ORPHA388, SNOMED_CT:204…
ERR1840768	chr10	43609079	43609095	7	43609096	43609096	Pheochromocytoma|Hirschsprung_disease_1|Familial_medullary_thyroid_carcinoma|Multiple_endocrine_neoplasia, _type_2b|Multiple_endocrine_neoplasia, _type_2a|Congenital_central_hypoventilation|Multiple_endocrine_neoplasia, _type_2|none_provided|not_provided|Human_Phenotype_Ontology:HP:0002666, MONDO:MONDO:0008233, MedGen:C0031511, OMIM:171300|MONDO:MONDO:0007723, MedGen:C3888239, OMIM:142623|MONDO:M…
ERR1840768	chr10	43609096	43609108	6	43609096	43609096	Pheochromocytoma|Hirschsprung_disease_1|Familial_medullary_thyroid_carcinoma|Multiple_endocrine_neoplasia, _type_2b|Multiple_endocrine_neoplasia, _type_2a|Congenital_central_hypoventilation|Multiple_endocrine_neoplasia, _type_2|none_provided|not_provided|Human_Phenotype_Ontology:HP:0002666, MONDO:MONDO:0008233, MedGen:C0031511, OMIM:171300|MONDO:MONDO:0007723, MedGen:C3888239, OMIM:142623|MONDO:M…
ERR1840768	chr10	43609096	43609108	6	43609102	43609102	Multiple_endocrine_neoplasia, _type_2a|Hereditary_cancer-predisposing_syndrome|Hirschsprung_disease|Multiple_endocrine_neoplasia, _type_2|not_provided|MONDO:MONDO:0008234, MeSH:D018813, MedGen:C0025268, OMIM:171400, Orphanet:ORPHA247698, SNOMED_CT:61808009|MONDO:MONDO:0015356, MedGen:C0027672, Orphanet:ORPHA140162, SNOMED_CT:699346009|MONDO:MONDO:0018309, MeSH:D006627, MedGen:C0019569, OMIM:PS142…
ERR1840768	chr10	43609096	43609108	6	43609102	43609102	Multiple_endocrine_neoplasia, _type_2a|Hereditary_cancer-predisposing_syndrome|Hirschsprung_disease|Multiple_endocrine_neoplasia, _type_2|not_specified|MONDO:MONDO:0008234, MeSH:D018813, MedGen:C0025268, OMIM:171400, Orphanet:ORPHA247698, SNOMED_CT:61808009|MONDO:MONDO:0015356, MedGen:C0027672, Orphanet:ORPHA140162, SNOMED_CT:699346009|MONDO:MONDO:0018309, MeSH:D006627, MedGen:C0019569, OMIM:PS14…
ERR1840768	chr10	43609096	43609108	6	43609103	43609103	Medullary_thyroid_carcinoma|Multiple_endocrine_neoplasia, _type_1|Multiple_endocrine_neoplasia, _type_2b|Multiple_endocrine_neoplasia, _type_2a|Multiple_endocrine_neoplasia, _type_4|Hirschsprung_disease|Multiple_endocrine_neoplasia, _type_2|none_provided|not_provided|Human_Phenotype_Ontology:HP:0002865, MONDO:MONDO:0015277, MeSH:C536914, MedGen:C0238462, Orphanet:ORPHA1332, SNOMED_CT:255032005|MO…
ERR1840768	chr10	43609096	43609108	6	43609104	43609104	Hereditary_cancer-predisposing_syndrome|Multiple_endocrine_neoplasia, _type_2|MULTIPLE_ENDOCRINE_NEOPLASIA, _TYPE_IIA, _WITH_HIRSCHSPRUNG_DISEASE|MONDO:MONDO:0015356, MedGen:C0027672, Orphanet:ORPHA140162, SNOMED_CT:699346009|MONDO:MONDO:0019003, MedGen:C4048306, Orphanet:ORPHA653, SNOMED_CT:61808009|MedGen:C4016286|Pathogenic
ERR1840768	chr10	43619173	43619183	16	43619180	43619180	Hirschsprung_disease|MONDO:MONDO:0018309, MeSH:D006627, MedGen:C0019569, OMIM:PS142623, Orphanet:ORPHA388, SNOMED_CT:204739008|Pathogenic
ERR1840768	chr13	78475306	78475325	5	78475316	78475316	Waardenburg_syndrome_type_4A|Hirschsprung_disease_2|MONDO:MONDO:0010192, MedGen:C1848519, OMIM:277580|MONDO:MONDO:0010833, MedGen:C1838564, OMIM:600155|Pathogenic
ERR1840769	chr22	38369490	38369498	10	38369492	38369503	Peripheral_demyelinating_neuropathy, _central_dysmyelination, _Waardenburg_syndrome, _and_Hirschsprung_disease|MONDO:MONDO:0012198, MedGen:C1836727, OMIM:609136, Orphanet:ORPHA163746|Pathogenic
ERR1840769	chr22	38369499	38369510	11	38369492	38369503	Peripheral_demyelinating_neuropathy, _central_dysmyelination, _Waardenburg_syndrome, _and_Hirschsprung_disease|MONDO:MONDO:0012198, MedGen:C1836727, OMIM:609136, Orphanet:ORPHA163746|Pathogenic
ERR1840769	chr22	38369949	38369975	10	38369962	38369962	Peripheral_demyelinating_neuropathy, _central_dysmyelination, _Waardenburg_syndrome, _and_Hirschsprung_disease|MONDO:MONDO:0012198, MedGen:C1836727, OMIM:609136, Orphanet:ORPHA163746|Pathogenic
ERR1840769	chr22	38369949	38369975	10	38369964	38369964	Peripheral_demyelinating_neuropathy, _central_dysmyelination, _Waardenburg_syndrome, _and_Hirschsprung_disease|MONDO:MONDO:0012198, MedGen:C1836727, OMIM:609136, Orphanet:ORPHA163746|Pathogenic
ERR1840769	chr22	38369985	38369992	11	38369988	38369988	Peripheral_demyelinating_neuropathy, _central_dysmyelination, _Waardenburg_syndrome, _and_Hirschsprung_disease|MONDO:MONDO:0012198, MedGen:C1836727, OMIM:609136, Orphanet:ORPHA163746|Pathogenic
ERR1840769	chr4	41749368	41749380	9	41749374	41749374	Neuroblastoma_with_Hirschsprung_disease|MedGen:C2751683|Pathogenic
ERR1840769	chr10	43595932	43595945	9	43595944	43595944	Hirschsprung_disease|MONDO:MONDO:0018309, MeSH:D006627, MedGen:C0019569, OMIM:PS142623, Orphanet:ORPHA388, SNOMED_CT:204739008|Pathogenic
ERR1840769	chr10	43597988	43597990	69	43597990	43597990	Hirschsprung_disease_1|Multiple_endocrine_neoplasia, _type_2|MONDO:MONDO:0007723, MedGen:C3888239, OMIM:142623|MONDO:MONDO:0019003, MedGen:C4048306, Orphanet:ORPHA653, SNOMED_CT:61808009|Pathogenic
ERR1840769	chr10	43600463	43600490	5	43600486	43600486	Hirschsprung_disease_1|MONDO:MONDO:0007723, MedGen:C3888239, OMIM:142623|Pathogenic
ERR1840769	chr10	43604607	43604611	23	43604611	43604611	Hirschsprung_disease_1|MONDO:MONDO:0007723, MedGen:C3888239, OMIM:142623|Pathogenic
ERR1840769	chr10	43609056	43609072	10	43609069	43609069	Familial_medullary_thyroid_carcinoma|Hereditary_cancer-predisposing_syndrome|Hirschsprung_disease|Multiple_endocrine_neoplasia, _type_2|not_provided|MONDO:MONDO:0007958, MedGen:C1833921, OMIM:155240, Orphanet:ORPHA99361|MONDO:MONDO:0015356, MedGen:C0027672, Orphanet:ORPHA140162, SNOMED_CT:699346009|MONDO:MONDO:0018309, MeSH:D006627, MedGen:C0019569, OMIM:PS142623, Orphanet:ORPHA388, SNOMED_CT:204…
ERR1840769	chr10	43609094	43609096	10	43609096	43609096	Pheochromocytoma|Hirschsprung_disease_1|Familial_medullary_thyroid_carcinoma|Multiple_endocrine_neoplasia, _type_2b|Multiple_endocrine_neoplasia, _type_2a|Congenital_central_hypoventilation|Multiple_endocrine_neoplasia, _type_2|none_provided|not_provided|Human_Phenotype_Ontology:HP:0002666, MONDO:MONDO:0008233, MedGen:C0031511, OMIM:171300|MONDO:MONDO:0007723, MedGen:C3888239, OMIM:142623|MONDO:M…
ERR1840769	chr10	43609097	43609108	9	43609102	43609102	Multiple_endocrine_neoplasia, _type_2a|Hereditary_cancer-predisposing_syndrome|Hirschsprung_disease|Multiple_endocrine_neoplasia, _type_2|not_provided|MONDO:MONDO:0008234, MeSH:D018813, MedGen:C0025268, OMIM:171400, Orphanet:ORPHA247698, SNOMED_CT:61808009|MONDO:MONDO:0015356, MedGen:C0027672, Orphanet:ORPHA140162, SNOMED_CT:699346009|MONDO:MONDO:0018309, MeSH:D006627, MedGen:C0019569, OMIM:PS142…
ERR1840769	chr10	43609097	43609108	9	43609102	43609102	Multiple_endocrine_neoplasia, _type_2a|Hereditary_cancer-predisposing_syndrome|Hirschsprung_disease|Multiple_endocrine_neoplasia, _type_2|not_specified|MONDO:MONDO:0008234, MeSH:D018813, MedGen:C0025268, OMIM:171400, Orphanet:ORPHA247698, SNOMED_CT:61808009|MONDO:MONDO:0015356, MedGen:C0027672, Orphanet:ORPHA140162, SNOMED_CT:699346009|MONDO:MONDO:0018309, MeSH:D006627, MedGen:C0019569, OMIM:PS14…
ERR1840769	chr10	43609097	43609108	9	43609103	43609103	Medullary_thyroid_carcinoma|Multiple_endocrine_neoplasia, _type_1|Multiple_endocrine_neoplasia, _type_2b|Multiple_endocrine_neoplasia, _type_2a|Multiple_endocrine_neoplasia, _type_4|Hirschsprung_disease|Multiple_endocrine_neoplasia, _type_2|none_provided|not_provided|Human_Phenotype_Ontology:HP:0002865, MONDO:MONDO:0015277, MeSH:C536914, MedGen:C0238462, Orphanet:ORPHA1332, SNOMED_CT:255032005|MO…
ERR1840769	chr10	43609097	43609108	9	43609104	43609104	Hereditary_cancer-predisposing_syndrome|Multiple_endocrine_neoplasia, _type_2|MULTIPLE_ENDOCRINE_NEOPLASIA, _TYPE_IIA, _WITH_HIRSCHSPRUNG_DISEASE|MONDO:MONDO:0015356, MedGen:C0027672, Orphanet:ORPHA140162, SNOMED_CT:699346009|MONDO:MONDO:0019003, MedGen:C4048306, Orphanet:ORPHA653, SNOMED_CT:61808009|MedGen:C4016286|Pathogenic
ERR1840769	chr10	43619178	43619183	42	43619180	43619180	Hirschsprung_disease|MONDO:MONDO:0018309, MeSH:D006627, MedGen:C0019569, OMIM:PS142623, Orphanet:ORPHA388, SNOMED_CT:204739008|Pathogenic
ERR1840769	chr10	43622124	43622126	44	43622126	43622126	Hirschsprung_disease|MONDO:MONDO:0018309, MeSH:D006627, MedGen:C0019569, OMIM:PS142623, Orphanet:ORPHA388, SNOMED_CT:204739008|Pathogenic
ERR1840769	chr13	78475315	78475319	36	78475316	78475316	Waardenburg_syndrome_type_4A|Hirschsprung_disease_2|MONDO:MONDO:0010192, MedGen:C1848519, OMIM:277580|MONDO:MONDO:0010833, MedGen:C1838564, OMIM:600155|Pathogenic
ERR1840769	chrX	153132104	153132113	6	153132113	153132114	Hydrocephalus, _X-linked, _with_hirschsprung_disease|MedGen:C4017784|Pathogenic
ERR1840770	chr4	41749356	41749377	5	41749374	41749374	Neuroblastoma_with_Hirschsprung_disease|MedGen:C2751683|Pathogenic
ERR1840770	chr10	43595936	43595949	7	43595944	43595944	Hirschsprung_disease|MONDO:MONDO:0018309, MeSH:D006627, MedGen:C0019569, OMIM:PS142623, Orphanet:ORPHA388, SNOMED_CT:204739008|Pathogenic
ERR1840770	chr10	43600477	43600504	8	43600486	43600486	Hirschsprung_disease_1|MONDO:MONDO:0007723, MedGen:C3888239, OMIM:142623|Pathogenic
ERR1840770	chr10	43604608	43604623	25	43604611	43604611	Hirschsprung_disease_1|MONDO:MONDO:0007723, MedGen:C3888239, OMIM:142623|Pathogenic
ERR1840770	chr10	43606662	43606678	7	43606667	43606668	Sensorineural_hearing_loss|Hirschsprung_disease_1|Human_Phenotype_Ontology:HP:0000374, Human_Phenotype_Ontology:HP:0000407, Human_Phenotype_Ontology:HP:0001753, Human_Phenotype_Ontology:HP:0001916, Human_Phenotype_Ontology:HP:0008538, Human_Phenotype_Ontology:HP:0008553, Human_Phenotype_Ontology:HP:0008565, Human_Phenotype_Ontology:HP:0008576, Human_Phenotype_Ontology:HP:0008611, Human_Phenotype_…
ERR1840770	chr10	43609066	43609076	20	43609069	43609069	Familial_medullary_thyroid_carcinoma|Hereditary_cancer-predisposing_syndrome|Hirschsprung_disease|Multiple_endocrine_neoplasia, _type_2|not_provided|MONDO:MONDO:0007958, MedGen:C1833921, OMIM:155240, Orphanet:ORPHA99361|MONDO:MONDO:0015356, MedGen:C0027672, Orphanet:ORPHA140162, SNOMED_CT:699346009|MONDO:MONDO:0018309, MeSH:D006627, MedGen:C0019569, OMIM:PS142623, Orphanet:ORPHA388, SNOMED_CT:204…
ERR1840770	chr10	43609095	43609102	12	43609096	43609096	Pheochromocytoma|Hirschsprung_disease_1|Familial_medullary_thyroid_carcinoma|Multiple_endocrine_neoplasia, _type_2b|Multiple_endocrine_neoplasia, _type_2a|Congenital_central_hypoventilation|Multiple_endocrine_neoplasia, _type_2|none_provided|not_provided|Human_Phenotype_Ontology:HP:0002666, MONDO:MONDO:0008233, MedGen:C0031511, OMIM:171300|MONDO:MONDO:0007723, MedGen:C3888239, OMIM:142623|MONDO:M…
ERR1840770	chr10	43609095	43609102	12	43609102	43609102	Multiple_endocrine_neoplasia, _type_2a|Hereditary_cancer-predisposing_syndrome|Hirschsprung_disease|Multiple_endocrine_neoplasia, _type_2|not_provided|MONDO:MONDO:0008234, MeSH:D018813, MedGen:C0025268, OMIM:171400, Orphanet:ORPHA247698, SNOMED_CT:61808009|MONDO:MONDO:0015356, MedGen:C0027672, Orphanet:ORPHA140162, SNOMED_CT:699346009|MONDO:MONDO:0018309, MeSH:D006627, MedGen:C0019569, OMIM:PS142…
ERR1840770	chr10	43609095	43609102	12	43609102	43609102	Multiple_endocrine_neoplasia, _type_2a|Hereditary_cancer-predisposing_syndrome|Hirschsprung_disease|Multiple_endocrine_neoplasia, _type_2|not_specified|MONDO:MONDO:0008234, MeSH:D018813, MedGen:C0025268, OMIM:171400, Orphanet:ORPHA247698, SNOMED_CT:61808009|MONDO:MONDO:0015356, MedGen:C0027672, Orphanet:ORPHA140162, SNOMED_CT:699346009|MONDO:MONDO:0018309, MeSH:D006627, MedGen:C0019569, OMIM:PS14…
ERR1840770	chr10	43609095	43609102	12	43609103	43609103	Medullary_thyroid_carcinoma|Multiple_endocrine_neoplasia, _type_1|Multiple_endocrine_neoplasia, _type_2b|Multiple_endocrine_neoplasia, _type_2a|Multiple_endocrine_neoplasia, _type_4|Hirschsprung_disease|Multiple_endocrine_neoplasia, _type_2|none_provided|not_provided|Human_Phenotype_Ontology:HP:0002865, MONDO:MONDO:0015277, MeSH:C536914, MedGen:C0238462, Orphanet:ORPHA1332, SNOMED_CT:255032005|MO…
ERR1840770	chr10	43609103	43609110	13	43609103	43609103	Medullary_thyroid_carcinoma|Multiple_endocrine_neoplasia, _type_1|Multiple_endocrine_neoplasia, _type_2b|Multiple_endocrine_neoplasia, _type_2a|Multiple_endocrine_neoplasia, _type_4|Hirschsprung_disease|Multiple_endocrine_neoplasia, _type_2|none_provided|not_provided|Human_Phenotype_Ontology:HP:0002865, MONDO:MONDO:0015277, MeSH:C536914, MedGen:C0238462, Orphanet:ORPHA1332, SNOMED_CT:255032005|MO…
ERR1840770	chr10	43609103	43609110	13	43609104	43609104	Hereditary_cancer-predisposing_syndrome|Multiple_endocrine_neoplasia, _type_2|MULTIPLE_ENDOCRINE_NEOPLASIA, _TYPE_IIA, _WITH_HIRSCHSPRUNG_DISEASE|MONDO:MONDO:0015356, MedGen:C0027672, Orphanet:ORPHA140162, SNOMED_CT:699346009|MONDO:MONDO:0019003, MedGen:C4048306, Orphanet:ORPHA653, SNOMED_CT:61808009|MedGen:C4016286|Pathogenic
ERR1840770	chr10	43619175	43619180	30	43619180	43619180	Hirschsprung_disease|MONDO:MONDO:0018309, MeSH:D006627, MedGen:C0019569, OMIM:PS142623, Orphanet:ORPHA388, SNOMED_CT:204739008|Pathogenic
ERR1840770	chr13	78475312	78475316	6	78475316	78475316	Waardenburg_syndrome_type_4A|Hirschsprung_disease_2|MONDO:MONDO:0010192, MedGen:C1848519, OMIM:277580|MONDO:MONDO:0010833, MedGen:C1838564, OMIM:600155|Pathogenic
ERR1840770	chrX	153132103	153132128	9	153132113	153132114	Hydrocephalus, _X-linked, _with_hirschsprung_disease|MedGen:C4017784|Pathogenic
ERR1840771	chr4	41749350	41749378	8	41749374	41749374	Neuroblastoma_with_Hirschsprung_disease|MedGen:C2751683|Pathogenic
ERR1840771	chr10	43595928	43595943	12	43595944	43595944	Hirschsprung_disease|MONDO:MONDO:0018309, MeSH:D006627, MedGen:C0019569, OMIM:PS142623, Orphanet:ORPHA388, SNOMED_CT:204739008|Pathogenic
ERR1840771	chr10	43600483	43600509	8	43600486	43600486	Hirschsprung_disease_1|MONDO:MONDO:0007723, MedGen:C3888239, OMIM:142623|Pathogenic
ERR1840771	chr10	43604607	43604612	34	43604611	43604611	Hirschsprung_disease_1|MONDO:MONDO:0007723, MedGen:C3888239, OMIM:142623|Pathogenic
ERR1840771	chr10	43609063	43609071	25	43609069	43609069	Familial_medullary_thyroid_carcinoma|Hereditary_cancer-predisposing_syndrome|Hirschsprung_disease|Multiple_endocrine_neoplasia, _type_2|not_provided|MONDO:MONDO:0007958, MedGen:C1833921, OMIM:155240, Orphanet:ORPHA99361|MONDO:MONDO:0015356, MedGen:C0027672, Orphanet:ORPHA140162, SNOMED_CT:699346009|MONDO:MONDO:0018309, MeSH:D006627, MedGen:C0019569, OMIM:PS142623, Orphanet:ORPHA388, SNOMED_CT:204…
ERR1840771	chr10	43609094	43609095	22	43609096	43609096	Pheochromocytoma|Hirschsprung_disease_1|Familial_medullary_thyroid_carcinoma|Multiple_endocrine_neoplasia, _type_2b|Multiple_endocrine_neoplasia, _type_2a|Congenital_central_hypoventilation|Multiple_endocrine_neoplasia, _type_2|none_provided|not_provided|Human_Phenotype_Ontology:HP:0002666, MONDO:MONDO:0008233, MedGen:C0031511, OMIM:171300|MONDO:MONDO:0007723, MedGen:C3888239, OMIM:142623|MONDO:M…
ERR1840771	chr10	43609096	43609098	21	43609096	43609096	Pheochromocytoma|Hirschsprung_disease_1|Familial_medullary_thyroid_carcinoma|Multiple_endocrine_neoplasia, _type_2b|Multiple_endocrine_neoplasia, _type_2a|Congenital_central_hypoventilation|Multiple_endocrine_neoplasia, _type_2|none_provided|not_provided|Human_Phenotype_Ontology:HP:0002666, MONDO:MONDO:0008233, MedGen:C0031511, OMIM:171300|MONDO:MONDO:0007723, MedGen:C3888239, OMIM:142623|MONDO:M…
ERR1840771	chr10	43609100	43609101	17	43609102	43609102	Multiple_endocrine_neoplasia, _type_2a|Hereditary_cancer-predisposing_syndrome|Hirschsprung_disease|Multiple_endocrine_neoplasia, _type_2|not_provided|MONDO:MONDO:0008234, MeSH:D018813, MedGen:C0025268, OMIM:171400, Orphanet:ORPHA247698, SNOMED_CT:61808009|MONDO:MONDO:0015356, MedGen:C0027672, Orphanet:ORPHA140162, SNOMED_CT:699346009|MONDO:MONDO:0018309, MeSH:D006627, MedGen:C0019569, OMIM:PS142…
ERR1840771	chr10	43609100	43609101	17	43609102	43609102	Multiple_endocrine_neoplasia, _type_2a|Hereditary_cancer-predisposing_syndrome|Hirschsprung_disease|Multiple_endocrine_neoplasia, _type_2|not_specified|MONDO:MONDO:0008234, MeSH:D018813, MedGen:C0025268, OMIM:171400, Orphanet:ORPHA247698, SNOMED_CT:61808009|MONDO:MONDO:0015356, MedGen:C0027672, Orphanet:ORPHA140162, SNOMED_CT:699346009|MONDO:MONDO:0018309, MeSH:D006627, MedGen:C0019569, OMIM:PS14…
ERR1840771	chr10	43609103	43609104	15	43609103	43609103	Medullary_thyroid_carcinoma|Multiple_endocrine_neoplasia, _type_1|Multiple_endocrine_neoplasia, _type_2b|Multiple_endocrine_neoplasia, _type_2a|Multiple_endocrine_neoplasia, _type_4|Hirschsprung_disease|Multiple_endocrine_neoplasia, _type_2|none_provided|not_provided|Human_Phenotype_Ontology:HP:0002865, MONDO:MONDO:0015277, MeSH:C536914, MedGen:C0238462, Orphanet:ORPHA1332, SNOMED_CT:255032005|MO…
ERR1840771	chr10	43609103	43609104	15	43609104	43609104	Hereditary_cancer-predisposing_syndrome|Multiple_endocrine_neoplasia, _type_2|MULTIPLE_ENDOCRINE_NEOPLASIA, _TYPE_IIA, _WITH_HIRSCHSPRUNG_DISEASE|MONDO:MONDO:0015356, MedGen:C0027672, Orphanet:ORPHA140162, SNOMED_CT:699346009|MONDO:MONDO:0019003, MedGen:C4048306, Orphanet:ORPHA653, SNOMED_CT:61808009|MedGen:C4016286|Pathogenic
ERR1840771	chr10	43619178	43619180	31	43619180	43619180	Hirschsprung_disease|MONDO:MONDO:0018309, MeSH:D006627, MedGen:C0019569, OMIM:PS142623, Orphanet:ORPHA388, SNOMED_CT:204739008|Pathogenic
ERR1840771	chr10	43622125	43622128	54	43622126	43622126	Hirschsprung_disease|MONDO:MONDO:0018309, MeSH:D006627, MedGen:C0019569, OMIM:PS142623, Orphanet:ORPHA388, SNOMED_CT:204739008|Pathogenic
ERR1840771	chr13	78475315	78475321	26	78475316	78475316	Waardenburg_syndrome_type_4A|Hirschsprung_disease_2|MONDO:MONDO:0010192, MedGen:C1848519, OMIM:277580|MONDO:MONDO:0010833, MedGen:C1838564, OMIM:600155|Pathogenic
ERR1840771	chrX	153132113	153132113	10	153132113	153132114	Hydrocephalus, _X-linked, _with_hirschsprung_disease|MedGen:C4017784|Pathogenic
ERR1840772	chr22	38369496	38369513	5	38369492	38369503	Peripheral_demyelinating_neuropathy, _central_dysmyelination, _Waardenburg_syndrome, _and_Hirschsprung_disease|MONDO:MONDO:0012198, MedGen:C1836727, OMIM:609136, Orphanet:ORPHA163746|Pathogenic
ERR1840772	chr22	38369723	38369737	10	38369728	38369728	Peripheral_demyelinating_neuropathy, _central_dysmyelination, _Waardenburg_syndrome, _and_Hirschsprung_disease|MONDO:MONDO:0012198, MedGen:C1836727, OMIM:609136, Orphanet:ORPHA163746|Pathogenic
ERR1840772	chr22	38369954	38369977	10	38369962	38369962	Peripheral_demyelinating_neuropathy, _central_dysmyelination, _Waardenburg_syndrome, _and_Hirschsprung_disease|MONDO:MONDO:0012198, MedGen:C1836727, OMIM:609136, Orphanet:ORPHA163746|Pathogenic
ERR1840772	chr22	38369954	38369977	10	38369964	38369964	Peripheral_demyelinating_neuropathy, _central_dysmyelination, _Waardenburg_syndrome, _and_Hirschsprung_disease|MONDO:MONDO:0012198, MedGen:C1836727, OMIM:609136, Orphanet:ORPHA163746|Pathogenic
ERR1840772	chr22	38369983	38369988	10	38369988	38369988	Peripheral_demyelinating_neuropathy, _central_dysmyelination, _Waardenburg_syndrome, _and_Hirschsprung_disease|MONDO:MONDO:0012198, MedGen:C1836727, OMIM:609136, Orphanet:ORPHA163746|Pathogenic
ERR1840772	chr10	43595924	43595948	5	43595944	43595944	Hirschsprung_disease|MONDO:MONDO:0018309, MeSH:D006627, MedGen:C0019569, OMIM:PS142623, Orphanet:ORPHA388, SNOMED_CT:204739008|Pathogenic
ERR1840772	chr10	43597988	43597990	31	43597990	43597990	Hirschsprung_disease_1|Multiple_endocrine_neoplasia, _type_2|MONDO:MONDO:0007723, MedGen:C3888239, OMIM:142623|MONDO:MONDO:0019003, MedGen:C4048306, Orphanet:ORPHA653, SNOMED_CT:61808009|Pathogenic
ERR1840772	chr10	43600458	43600488	8	43600486	43600486	Hirschsprung_disease_1|MONDO:MONDO:0007723, MedGen:C3888239, OMIM:142623|Pathogenic
ERR1840772	chr10	43604606	43604615	25	43604611	43604611	Hirschsprung_disease_1|MONDO:MONDO:0007723, MedGen:C3888239, OMIM:142623|Pathogenic
ERR1840772	chr10	43609067	43609096	14	43609069	43609069	Familial_medullary_thyroid_carcinoma|Hereditary_cancer-predisposing_syndrome|Hirschsprung_disease|Multiple_endocrine_neoplasia, _type_2|not_provided|MONDO:MONDO:0007958, MedGen:C1833921, OMIM:155240, Orphanet:ORPHA99361|MONDO:MONDO:0015356, MedGen:C0027672, Orphanet:ORPHA140162, SNOMED_CT:699346009|MONDO:MONDO:0018309, MeSH:D006627, MedGen:C0019569, OMIM:PS142623, Orphanet:ORPHA388, SNOMED_CT:204…
ERR1840772	chr10	43609067	43609096	14	43609096	43609096	Pheochromocytoma|Hirschsprung_disease_1|Familial_medullary_thyroid_carcinoma|Multiple_endocrine_neoplasia, _type_2b|Multiple_endocrine_neoplasia, _type_2a|Congenital_central_hypoventilation|Multiple_endocrine_neoplasia, _type_2|none_provided|not_provided|Human_Phenotype_Ontology:HP:0002666, MONDO:MONDO:0008233, MedGen:C0031511, OMIM:171300|MONDO:MONDO:0007723, MedGen:C3888239, OMIM:142623|MONDO:M…
ERR1840772	chr10	43609097	43609101	13	43609102	43609102	Multiple_endocrine_neoplasia, _type_2a|Hereditary_cancer-predisposing_syndrome|Hirschsprung_disease|Multiple_endocrine_neoplasia, _type_2|not_provided|MONDO:MONDO:0008234, MeSH:D018813, MedGen:C0025268, OMIM:171400, Orphanet:ORPHA247698, SNOMED_CT:61808009|MONDO:MONDO:0015356, MedGen:C0027672, Orphanet:ORPHA140162, SNOMED_CT:699346009|MONDO:MONDO:0018309, MeSH:D006627, MedGen:C0019569, OMIM:PS142…
ERR1840772	chr10	43609097	43609101	13	43609102	43609102	Multiple_endocrine_neoplasia, _type_2a|Hereditary_cancer-predisposing_syndrome|Hirschsprung_disease|Multiple_endocrine_neoplasia, _type_2|not_specified|MONDO:MONDO:0008234, MeSH:D018813, MedGen:C0025268, OMIM:171400, Orphanet:ORPHA247698, SNOMED_CT:61808009|MONDO:MONDO:0015356, MedGen:C0027672, Orphanet:ORPHA140162, SNOMED_CT:699346009|MONDO:MONDO:0018309, MeSH:D006627, MedGen:C0019569, OMIM:PS14…
ERR1840772	chr10	43609102	43609105	14	43609102	43609102	Multiple_endocrine_neoplasia, _type_2a|Hereditary_cancer-predisposing_syndrome|Hirschsprung_disease|Multiple_endocrine_neoplasia, _type_2|not_provided|MONDO:MONDO:0008234, MeSH:D018813, MedGen:C0025268, OMIM:171400, Orphanet:ORPHA247698, SNOMED_CT:61808009|MONDO:MONDO:0015356, MedGen:C0027672, Orphanet:ORPHA140162, SNOMED_CT:699346009|MONDO:MONDO:0018309, MeSH:D006627, MedGen:C0019569, OMIM:PS142…
ERR1840772	chr10	43609102	43609105	14	43609102	43609102	Multiple_endocrine_neoplasia, _type_2a|Hereditary_cancer-predisposing_syndrome|Hirschsprung_disease|Multiple_endocrine_neoplasia, _type_2|not_specified|MONDO:MONDO:0008234, MeSH:D018813, MedGen:C0025268, OMIM:171400, Orphanet:ORPHA247698, SNOMED_CT:61808009|MONDO:MONDO:0015356, MedGen:C0027672, Orphanet:ORPHA140162, SNOMED_CT:699346009|MONDO:MONDO:0018309, MeSH:D006627, MedGen:C0019569, OMIM:PS14…
ERR1840772	chr10	43609102	43609105	14	43609103	43609103	Medullary_thyroid_carcinoma|Multiple_endocrine_neoplasia, _type_1|Multiple_endocrine_neoplasia, _type_2b|Multiple_endocrine_neoplasia, _type_2a|Multiple_endocrine_neoplasia, _type_4|Hirschsprung_disease|Multiple_endocrine_neoplasia, _type_2|none_provided|not_provided|Human_Phenotype_Ontology:HP:0002865, MONDO:MONDO:0015277, MeSH:C536914, MedGen:C0238462, Orphanet:ORPHA1332, SNOMED_CT:255032005|MO…
ERR1840772	chr10	43609102	43609105	14	43609104	43609104	Hereditary_cancer-predisposing_syndrome|Multiple_endocrine_neoplasia, _type_2|MULTIPLE_ENDOCRINE_NEOPLASIA, _TYPE_IIA, _WITH_HIRSCHSPRUNG_DISEASE|MONDO:MONDO:0015356, MedGen:C0027672, Orphanet:ORPHA140162, SNOMED_CT:699346009|MONDO:MONDO:0019003, MedGen:C4048306, Orphanet:ORPHA653, SNOMED_CT:61808009|MedGen:C4016286|Pathogenic
ERR1840772	chrX	153132109	153132116	5	153132113	153132114	Hydrocephalus, _X-linked, _with_hirschsprung_disease|MedGen:C4017784|Pathogenic
ERR1840773	chr4	41749368	41749375	5	41749374	41749374	Neuroblastoma_with_Hirschsprung_disease|MedGen:C2751683|Pathogenic
ERR1840773	chr10	43595929	43595945	8	43595944	43595944	Hirschsprung_disease|MONDO:MONDO:0018309, MeSH:D006627, MedGen:C0019569, OMIM:PS142623, Orphanet:ORPHA388, SNOMED_CT:204739008|Pathogenic
ERR1840773	chr10	43600473	43600499	19	43600486	43600486	Hirschsprung_disease_1|MONDO:MONDO:0007723, MedGen:C3888239, OMIM:142623|Pathogenic
ERR1840773	chr10	43604609	43604611	20	43604611	43604611	Hirschsprung_disease_1|MONDO:MONDO:0007723, MedGen:C3888239, OMIM:142623|Pathogenic
ERR1840773	chr10	43609063	43609070	27	43609069	43609069	Familial_medullary_thyroid_carcinoma|Hereditary_cancer-predisposing_syndrome|Hirschsprung_disease|Multiple_endocrine_neoplasia, _type_2|not_provided|MONDO:MONDO:0007958, MedGen:C1833921, OMIM:155240, Orphanet:ORPHA99361|MONDO:MONDO:0015356, MedGen:C0027672, Orphanet:ORPHA140162, SNOMED_CT:699346009|MONDO:MONDO:0018309, MeSH:D006627, MedGen:C0019569, OMIM:PS142623, Orphanet:ORPHA388, SNOMED_CT:204…
ERR1840773	chr10	43609094	43609096	20	43609096	43609096	Pheochromocytoma|Hirschsprung_disease_1|Familial_medullary_thyroid_carcinoma|Multiple_endocrine_neoplasia, _type_2b|Multiple_endocrine_neoplasia, _type_2a|Congenital_central_hypoventilation|Multiple_endocrine_neoplasia, _type_2|none_provided|not_provided|Human_Phenotype_Ontology:HP:0002666, MONDO:MONDO:0008233, MedGen:C0031511, OMIM:171300|MONDO:MONDO:0007723, MedGen:C3888239, OMIM:142623|MONDO:M…
ERR1840773	chr10	43609101	43609101	18	43609102	43609102	Multiple_endocrine_neoplasia, _type_2a|Hereditary_cancer-predisposing_syndrome|Hirschsprung_disease|Multiple_endocrine_neoplasia, _type_2|not_provided|MONDO:MONDO:0008234, MeSH:D018813, MedGen:C0025268, OMIM:171400, Orphanet:ORPHA247698, SNOMED_CT:61808009|MONDO:MONDO:0015356, MedGen:C0027672, Orphanet:ORPHA140162, SNOMED_CT:699346009|MONDO:MONDO:0018309, MeSH:D006627, MedGen:C0019569, OMIM:PS142…
ERR1840773	chr10	43609101	43609101	18	43609102	43609102	Multiple_endocrine_neoplasia, _type_2a|Hereditary_cancer-predisposing_syndrome|Hirschsprung_disease|Multiple_endocrine_neoplasia, _type_2|not_specified|MONDO:MONDO:0008234, MeSH:D018813, MedGen:C0025268, OMIM:171400, Orphanet:ORPHA247698, SNOMED_CT:61808009|MONDO:MONDO:0015356, MedGen:C0027672, Orphanet:ORPHA140162, SNOMED_CT:699346009|MONDO:MONDO:0018309, MeSH:D006627, MedGen:C0019569, OMIM:PS14…
ERR1840773	chr10	43609102	43609103	17	43609102	43609102	Multiple_endocrine_neoplasia, _type_2a|Hereditary_cancer-predisposing_syndrome|Hirschsprung_disease|Multiple_endocrine_neoplasia, _type_2|not_provided|MONDO:MONDO:0008234, MeSH:D018813, MedGen:C0025268, OMIM:171400, Orphanet:ORPHA247698, SNOMED_CT:61808009|MONDO:MONDO:0015356, MedGen:C0027672, Orphanet:ORPHA140162, SNOMED_CT:699346009|MONDO:MONDO:0018309, MeSH:D006627, MedGen:C0019569, OMIM:PS142…
ERR1840773	chr10	43609102	43609103	17	43609102	43609102	Multiple_endocrine_neoplasia, _type_2a|Hereditary_cancer-predisposing_syndrome|Hirschsprung_disease|Multiple_endocrine_neoplasia, _type_2|not_specified|MONDO:MONDO:0008234, MeSH:D018813, MedGen:C0025268, OMIM:171400, Orphanet:ORPHA247698, SNOMED_CT:61808009|MONDO:MONDO:0015356, MedGen:C0027672, Orphanet:ORPHA140162, SNOMED_CT:699346009|MONDO:MONDO:0018309, MeSH:D006627, MedGen:C0019569, OMIM:PS14…
ERR1840773	chr10	43609102	43609103	17	43609103	43609103	Medullary_thyroid_carcinoma|Multiple_endocrine_neoplasia, _type_1|Multiple_endocrine_neoplasia, _type_2b|Multiple_endocrine_neoplasia, _type_2a|Multiple_endocrine_neoplasia, _type_4|Hirschsprung_disease|Multiple_endocrine_neoplasia, _type_2|none_provided|not_provided|Human_Phenotype_Ontology:HP:0002865, MONDO:MONDO:0015277, MeSH:C536914, MedGen:C0238462, Orphanet:ORPHA1332, SNOMED_CT:255032005|MO…
ERR1840773	chr10	43609102	43609103	17	43609104	43609104	Hereditary_cancer-predisposing_syndrome|Multiple_endocrine_neoplasia, _type_2|MULTIPLE_ENDOCRINE_NEOPLASIA, _TYPE_IIA, _WITH_HIRSCHSPRUNG_DISEASE|MONDO:MONDO:0015356, MedGen:C0027672, Orphanet:ORPHA140162, SNOMED_CT:699346009|MONDO:MONDO:0019003, MedGen:C4048306, Orphanet:ORPHA653, SNOMED_CT:61808009|MedGen:C4016286|Pathogenic
ERR1840773	chr10	43619173	43619184	32	43619180	43619180	Hirschsprung_disease|MONDO:MONDO:0018309, MeSH:D006627, MedGen:C0019569, OMIM:PS142623, Orphanet:ORPHA388, SNOMED_CT:204739008|Pathogenic
ERR1840773	chr10	43622111	43622127	24	43622126	43622126	Hirschsprung_disease|MONDO:MONDO:0018309, MeSH:D006627, MedGen:C0019569, OMIM:PS142623, Orphanet:ORPHA388, SNOMED_CT:204739008|Pathogenic
ERR1840773	chr13	78475314	78475316	15	78475316	78475316	Waardenburg_syndrome_type_4A|Hirschsprung_disease_2|MONDO:MONDO:0010192, MedGen:C1848519, OMIM:277580|MONDO:MONDO:0010833, MedGen:C1838564, OMIM:600155|Pathogenic
ERR1840773	chrX	153132111	153132117	15	153132113	153132114	Hydrocephalus, _X-linked, _with_hirschsprung_disease|MedGen:C4017784|Pathogenic
ERR1840774	chr4	41749358	41749380	5	41749374	41749374	Neuroblastoma_with_Hirschsprung_disease|MedGen:C2751683|Pathogenic
ERR1840774	chr10	43595938	43595947	6	43595944	43595944	Hirschsprung_disease|MONDO:MONDO:0018309, MeSH:D006627, MedGen:C0019569, OMIM:PS142623, Orphanet:ORPHA388, SNOMED_CT:204739008|Pathogenic
ERR1840774	chr10	43609065	43609070	16	43609069	43609069	Familial_medullary_thyroid_carcinoma|Hereditary_cancer-predisposing_syndrome|Hirschsprung_disease|Multiple_endocrine_neoplasia, _type_2|not_provided|MONDO:MONDO:0007958, MedGen:C1833921, OMIM:155240, Orphanet:ORPHA99361|MONDO:MONDO:0015356, MedGen:C0027672, Orphanet:ORPHA140162, SNOMED_CT:699346009|MONDO:MONDO:0018309, MeSH:D006627, MedGen:C0019569, OMIM:PS142623, Orphanet:ORPHA388, SNOMED_CT:204…
ERR1840774	chr10	43609095	43609097	16	43609096	43609096	Pheochromocytoma|Hirschsprung_disease_1|Familial_medullary_thyroid_carcinoma|Multiple_endocrine_neoplasia, _type_2b|Multiple_endocrine_neoplasia, _type_2a|Congenital_central_hypoventilation|Multiple_endocrine_neoplasia, _type_2|none_provided|not_provided|Human_Phenotype_Ontology:HP:0002666, MONDO:MONDO:0008233, MedGen:C0031511, OMIM:171300|MONDO:MONDO:0007723, MedGen:C3888239, OMIM:142623|MONDO:M…
ERR1840774	chr10	43609100	43609101	13	43609102	43609102	Multiple_endocrine_neoplasia, _type_2a|Hereditary_cancer-predisposing_syndrome|Hirschsprung_disease|Multiple_endocrine_neoplasia, _type_2|not_provided|MONDO:MONDO:0008234, MeSH:D018813, MedGen:C0025268, OMIM:171400, Orphanet:ORPHA247698, SNOMED_CT:61808009|MONDO:MONDO:0015356, MedGen:C0027672, Orphanet:ORPHA140162, SNOMED_CT:699346009|MONDO:MONDO:0018309, MeSH:D006627, MedGen:C0019569, OMIM:PS142…
ERR1840774	chr10	43609100	43609101	13	43609102	43609102	Multiple_endocrine_neoplasia, _type_2a|Hereditary_cancer-predisposing_syndrome|Hirschsprung_disease|Multiple_endocrine_neoplasia, _type_2|not_specified|MONDO:MONDO:0008234, MeSH:D018813, MedGen:C0025268, OMIM:171400, Orphanet:ORPHA247698, SNOMED_CT:61808009|MONDO:MONDO:0015356, MedGen:C0027672, Orphanet:ORPHA140162, SNOMED_CT:699346009|MONDO:MONDO:0018309, MeSH:D006627, MedGen:C0019569, OMIM:PS14…
ERR1840774	chr10	43609102	43609110	12	43609102	43609102	Multiple_endocrine_neoplasia, _type_2a|Hereditary_cancer-predisposing_syndrome|Hirschsprung_disease|Multiple_endocrine_neoplasia, _type_2|not_provided|MONDO:MONDO:0008234, MeSH:D018813, MedGen:C0025268, OMIM:171400, Orphanet:ORPHA247698, SNOMED_CT:61808009|MONDO:MONDO:0015356, MedGen:C0027672, Orphanet:ORPHA140162, SNOMED_CT:699346009|MONDO:MONDO:0018309, MeSH:D006627, MedGen:C0019569, OMIM:PS142…
ERR1840774	chr10	43609102	43609110	12	43609102	43609102	Multiple_endocrine_neoplasia, _type_2a|Hereditary_cancer-predisposing_syndrome|Hirschsprung_disease|Multiple_endocrine_neoplasia, _type_2|not_specified|MONDO:MONDO:0008234, MeSH:D018813, MedGen:C0025268, OMIM:171400, Orphanet:ORPHA247698, SNOMED_CT:61808009|MONDO:MONDO:0015356, MedGen:C0027672, Orphanet:ORPHA140162, SNOMED_CT:699346009|MONDO:MONDO:0018309, MeSH:D006627, MedGen:C0019569, OMIM:PS14…
ERR1840774	chr10	43609102	43609110	12	43609103	43609103	Medullary_thyroid_carcinoma|Multiple_endocrine_neoplasia, _type_1|Multiple_endocrine_neoplasia, _type_2b|Multiple_endocrine_neoplasia, _type_2a|Multiple_endocrine_neoplasia, _type_4|Hirschsprung_disease|Multiple_endocrine_neoplasia, _type_2|none_provided|not_provided|Human_Phenotype_Ontology:HP:0002865, MONDO:MONDO:0015277, MeSH:C536914, MedGen:C0238462, Orphanet:ORPHA1332, SNOMED_CT:255032005|MO…
ERR1840774	chr10	43609102	43609110	12	43609104	43609104	Hereditary_cancer-predisposing_syndrome|Multiple_endocrine_neoplasia, _type_2|MULTIPLE_ENDOCRINE_NEOPLASIA, _TYPE_IIA, _WITH_HIRSCHSPRUNG_DISEASE|MONDO:MONDO:0015356, MedGen:C0027672, Orphanet:ORPHA140162, SNOMED_CT:699346009|MONDO:MONDO:0019003, MedGen:C4048306, Orphanet:ORPHA653, SNOMED_CT:61808009|MedGen:C4016286|Pathogenic
ERR1840774	chr10	43619176	43619181	39	43619180	43619180	Hirschsprung_disease|MONDO:MONDO:0018309, MeSH:D006627, MedGen:C0019569, OMIM:PS142623, Orphanet:ORPHA388, SNOMED_CT:204739008|Pathogenic
ERR1840775	chr10	43595924	43595951	6	43595944	43595944	Hirschsprung_disease|MONDO:MONDO:0018309, MeSH:D006627, MedGen:C0019569, OMIM:PS142623, Orphanet:ORPHA388, SNOMED_CT:204739008|Pathogenic
ERR1840775	chr10	43597989	43597993	28	43597990	43597990	Hirschsprung_disease_1|Multiple_endocrine_neoplasia, _type_2|MONDO:MONDO:0007723, MedGen:C3888239, OMIM:142623|MONDO:MONDO:0019003, MedGen:C4048306, Orphanet:ORPHA653, SNOMED_CT:61808009|Pathogenic
ERR1840775	chr10	43604610	43604639	18	43604611	43604611	Hirschsprung_disease_1|MONDO:MONDO:0007723, MedGen:C3888239, OMIM:142623|Pathogenic
ERR1840775	chr10	43609048	43609074	7	43609069	43609069	Familial_medullary_thyroid_carcinoma|Hereditary_cancer-predisposing_syndrome|Hirschsprung_disease|Multiple_endocrine_neoplasia, _type_2|not_provided|MONDO:MONDO:0007958, MedGen:C1833921, OMIM:155240, Orphanet:ORPHA99361|MONDO:MONDO:0015356, MedGen:C0027672, Orphanet:ORPHA140162, SNOMED_CT:699346009|MONDO:MONDO:0018309, MeSH:D006627, MedGen:C0019569, OMIM:PS142623, Orphanet:ORPHA388, SNOMED_CT:204…
ERR1840775	chr10	43619174	43619186	12	43619180	43619180	Hirschsprung_disease|MONDO:MONDO:0018309, MeSH:D006627, MedGen:C0019569, OMIM:PS142623, Orphanet:ORPHA388, SNOMED_CT:204739008|Pathogenic
ERR1840775	chr13	78475315	78475318	17	78475316	78475316	Waardenburg_syndrome_type_4A|Hirschsprung_disease_2|MONDO:MONDO:0010192, MedGen:C1848519, OMIM:277580|MONDO:MONDO:0010833, MedGen:C1838564, OMIM:600155|Pathogenic
ERR1840776	chr22	38369725	38369731	9	38369728	38369728	Peripheral_demyelinating_neuropathy, _central_dysmyelination, _Waardenburg_syndrome, _and_Hirschsprung_disease|MONDO:MONDO:0012198, MedGen:C1836727, OMIM:609136, Orphanet:ORPHA163746|Pathogenic
ERR1840776	chr22	38369945	38369968	15	38369962	38369962	Peripheral_demyelinating_neuropathy, _central_dysmyelination, _Waardenburg_syndrome, _and_Hirschsprung_disease|MONDO:MONDO:0012198, MedGen:C1836727, OMIM:609136, Orphanet:ORPHA163746|Pathogenic
ERR1840776	chr22	38369945	38369968	15	38369964	38369964	Peripheral_demyelinating_neuropathy, _central_dysmyelination, _Waardenburg_syndrome, _and_Hirschsprung_disease|MONDO:MONDO:0012198, MedGen:C1836727, OMIM:609136, Orphanet:ORPHA163746|Pathogenic
ERR1840776	chr22	38369984	38369994	14	38369988	38369988	Peripheral_demyelinating_neuropathy, _central_dysmyelination, _Waardenburg_syndrome, _and_Hirschsprung_disease|MONDO:MONDO:0012198, MedGen:C1836727, OMIM:609136, Orphanet:ORPHA163746|Pathogenic
ERR1840776	chr10	43595894	43595945	7	43595944	43595944	Hirschsprung_disease|MONDO:MONDO:0018309, MeSH:D006627, MedGen:C0019569, OMIM:PS142623, Orphanet:ORPHA388, SNOMED_CT:204739008|Pathogenic
ERR1840776	chr10	43597988	43597991	54	43597990	43597990	Hirschsprung_disease_1|Multiple_endocrine_neoplasia, _type_2|MONDO:MONDO:0007723, MedGen:C3888239, OMIM:142623|MONDO:MONDO:0019003, MedGen:C4048306, Orphanet:ORPHA653, SNOMED_CT:61808009|Pathogenic
ERR1840776	chr10	43600485	43600492	8	43600486	43600486	Hirschsprung_disease_1|MONDO:MONDO:0007723, MedGen:C3888239, OMIM:142623|Pathogenic
ERR1840776	chr10	43604593	43604616	17	43604611	43604611	Hirschsprung_disease_1|MONDO:MONDO:0007723, MedGen:C3888239, OMIM:142623|Pathogenic
ERR1840776	chr10	43609069	43609070	14	43609069	43609069	Familial_medullary_thyroid_carcinoma|Hereditary_cancer-predisposing_syndrome|Hirschsprung_disease|Multiple_endocrine_neoplasia, _type_2|not_provided|MONDO:MONDO:0007958, MedGen:C1833921, OMIM:155240, Orphanet:ORPHA99361|MONDO:MONDO:0015356, MedGen:C0027672, Orphanet:ORPHA140162, SNOMED_CT:699346009|MONDO:MONDO:0018309, MeSH:D006627, MedGen:C0019569, OMIM:PS142623, Orphanet:ORPHA388, SNOMED_CT:204…
ERR1840776	chr10	43609090	43609096	13	43609096	43609096	Pheochromocytoma|Hirschsprung_disease_1|Familial_medullary_thyroid_carcinoma|Multiple_endocrine_neoplasia, _type_2b|Multiple_endocrine_neoplasia, _type_2a|Congenital_central_hypoventilation|Multiple_endocrine_neoplasia, _type_2|none_provided|not_provided|Human_Phenotype_Ontology:HP:0002666, MONDO:MONDO:0008233, MedGen:C0031511, OMIM:171300|MONDO:MONDO:0007723, MedGen:C3888239, OMIM:142623|MONDO:M…
ERR1840776	chr10	43609100	43609112	11	43609102	43609102	Multiple_endocrine_neoplasia, _type_2a|Hereditary_cancer-predisposing_syndrome|Hirschsprung_disease|Multiple_endocrine_neoplasia, _type_2|not_provided|MONDO:MONDO:0008234, MeSH:D018813, MedGen:C0025268, OMIM:171400, Orphanet:ORPHA247698, SNOMED_CT:61808009|MONDO:MONDO:0015356, MedGen:C0027672, Orphanet:ORPHA140162, SNOMED_CT:699346009|MONDO:MONDO:0018309, MeSH:D006627, MedGen:C0019569, OMIM:PS142…
ERR1840776	chr10	43609100	43609112	11	43609102	43609102	Multiple_endocrine_neoplasia, _type_2a|Hereditary_cancer-predisposing_syndrome|Hirschsprung_disease|Multiple_endocrine_neoplasia, _type_2|not_specified|MONDO:MONDO:0008234, MeSH:D018813, MedGen:C0025268, OMIM:171400, Orphanet:ORPHA247698, SNOMED_CT:61808009|MONDO:MONDO:0015356, MedGen:C0027672, Orphanet:ORPHA140162, SNOMED_CT:699346009|MONDO:MONDO:0018309, MeSH:D006627, MedGen:C0019569, OMIM:PS14…
ERR1840776	chr10	43609100	43609112	11	43609103	43609103	Medullary_thyroid_carcinoma|Multiple_endocrine_neoplasia, _type_1|Multiple_endocrine_neoplasia, _type_2b|Multiple_endocrine_neoplasia, _type_2a|Multiple_endocrine_neoplasia, _type_4|Hirschsprung_disease|Multiple_endocrine_neoplasia, _type_2|none_provided|not_provided|Human_Phenotype_Ontology:HP:0002865, MONDO:MONDO:0015277, MeSH:C536914, MedGen:C0238462, Orphanet:ORPHA1332, SNOMED_CT:255032005|MO…
ERR1840776	chr10	43609100	43609112	11	43609104	43609104	Hereditary_cancer-predisposing_syndrome|Multiple_endocrine_neoplasia, _type_2|MULTIPLE_ENDOCRINE_NEOPLASIA, _TYPE_IIA, _WITH_HIRSCHSPRUNG_DISEASE|MONDO:MONDO:0015356, MedGen:C0027672, Orphanet:ORPHA140162, SNOMED_CT:699346009|MONDO:MONDO:0019003, MedGen:C4048306, Orphanet:ORPHA653, SNOMED_CT:61808009|MedGen:C4016286|Pathogenic
ERR1840776	chr10	43619179	43619183	24	43619180	43619180	Hirschsprung_disease|MONDO:MONDO:0018309, MeSH:D006627, MedGen:C0019569, OMIM:PS142623, Orphanet:ORPHA388, SNOMED_CT:204739008|Pathogenic
ERR1840776	chr10	43622125	43622130	29	43622126	43622126	Hirschsprung_disease|MONDO:MONDO:0018309, MeSH:D006627, MedGen:C0019569, OMIM:PS142623, Orphanet:ORPHA388, SNOMED_CT:204739008|Pathogenic
ERR1840776	chrX	153132105	153132115	9	153132113	153132114	Hydrocephalus, _X-linked, _with_hirschsprung_disease|MedGen:C4017784|Pathogenic
ERR1840778	chr4	41749361	41749374	10	41749374	41749374	Neuroblastoma_with_Hirschsprung_disease|MedGen:C2751683|Pathogenic
ERR1840778	chr10	43595933	43595948	15	43595944	43595944	Hirschsprung_disease|MONDO:MONDO:0018309, MeSH:D006627, MedGen:C0019569, OMIM:PS142623, Orphanet:ORPHA388, SNOMED_CT:204739008|Pathogenic
ERR1840778	chr10	43597989	43597990	68	43597990	43597990	Hirschsprung_disease_1|Multiple_endocrine_neoplasia, _type_2|MONDO:MONDO:0007723, MedGen:C3888239, OMIM:142623|MONDO:MONDO:0019003, MedGen:C4048306, Orphanet:ORPHA653, SNOMED_CT:61808009|Pathogenic
ERR1840778	chr10	43600468	43600491	6	43600486	43600486	Hirschsprung_disease_1|MONDO:MONDO:0007723, MedGen:C3888239, OMIM:142623|Pathogenic
ERR1840778	chr10	43606654	43606679	11	43606667	43606668	Sensorineural_hearing_loss|Hirschsprung_disease_1|Human_Phenotype_Ontology:HP:0000374, Human_Phenotype_Ontology:HP:0000407, Human_Phenotype_Ontology:HP:0001753, Human_Phenotype_Ontology:HP:0001916, Human_Phenotype_Ontology:HP:0008538, Human_Phenotype_Ontology:HP:0008553, Human_Phenotype_Ontology:HP:0008565, Human_Phenotype_Ontology:HP:0008576, Human_Phenotype_Ontology:HP:0008611, Human_Phenotype_…
ERR1840778	chr10	43609064	43609073	27	43609069	43609069	Familial_medullary_thyroid_carcinoma|Hereditary_cancer-predisposing_syndrome|Hirschsprung_disease|Multiple_endocrine_neoplasia, _type_2|not_provided|MONDO:MONDO:0007958, MedGen:C1833921, OMIM:155240, Orphanet:ORPHA99361|MONDO:MONDO:0015356, MedGen:C0027672, Orphanet:ORPHA140162, SNOMED_CT:699346009|MONDO:MONDO:0018309, MeSH:D006627, MedGen:C0019569, OMIM:PS142623, Orphanet:ORPHA388, SNOMED_CT:204…
ERR1840778	chr10	43609095	43609095	26	43609096	43609096	Pheochromocytoma|Hirschsprung_disease_1|Familial_medullary_thyroid_carcinoma|Multiple_endocrine_neoplasia, _type_2b|Multiple_endocrine_neoplasia, _type_2a|Congenital_central_hypoventilation|Multiple_endocrine_neoplasia, _type_2|none_provided|not_provided|Human_Phenotype_Ontology:HP:0002666, MONDO:MONDO:0008233, MedGen:C0031511, OMIM:171300|MONDO:MONDO:0007723, MedGen:C3888239, OMIM:142623|MONDO:M…
ERR1840778	chr10	43609096	43609098	24	43609096	43609096	Pheochromocytoma|Hirschsprung_disease_1|Familial_medullary_thyroid_carcinoma|Multiple_endocrine_neoplasia, _type_2b|Multiple_endocrine_neoplasia, _type_2a|Congenital_central_hypoventilation|Multiple_endocrine_neoplasia, _type_2|none_provided|not_provided|Human_Phenotype_Ontology:HP:0002666, MONDO:MONDO:0008233, MedGen:C0031511, OMIM:171300|MONDO:MONDO:0007723, MedGen:C3888239, OMIM:142623|MONDO:M…
ERR1840778	chr10	43609100	43609105	22	43609102	43609102	Multiple_endocrine_neoplasia, _type_2a|Hereditary_cancer-predisposing_syndrome|Hirschsprung_disease|Multiple_endocrine_neoplasia, _type_2|not_provided|MONDO:MONDO:0008234, MeSH:D018813, MedGen:C0025268, OMIM:171400, Orphanet:ORPHA247698, SNOMED_CT:61808009|MONDO:MONDO:0015356, MedGen:C0027672, Orphanet:ORPHA140162, SNOMED_CT:699346009|MONDO:MONDO:0018309, MeSH:D006627, MedGen:C0019569, OMIM:PS142…
ERR1840778	chr10	43609100	43609105	22	43609102	43609102	Multiple_endocrine_neoplasia, _type_2a|Hereditary_cancer-predisposing_syndrome|Hirschsprung_disease|Multiple_endocrine_neoplasia, _type_2|not_specified|MONDO:MONDO:0008234, MeSH:D018813, MedGen:C0025268, OMIM:171400, Orphanet:ORPHA247698, SNOMED_CT:61808009|MONDO:MONDO:0015356, MedGen:C0027672, Orphanet:ORPHA140162, SNOMED_CT:699346009|MONDO:MONDO:0018309, MeSH:D006627, MedGen:C0019569, OMIM:PS14…
ERR1840778	chr10	43609100	43609105	22	43609103	43609103	Medullary_thyroid_carcinoma|Multiple_endocrine_neoplasia, _type_1|Multiple_endocrine_neoplasia, _type_2b|Multiple_endocrine_neoplasia, _type_2a|Multiple_endocrine_neoplasia, _type_4|Hirschsprung_disease|Multiple_endocrine_neoplasia, _type_2|none_provided|not_provided|Human_Phenotype_Ontology:HP:0002865, MONDO:MONDO:0015277, MeSH:C536914, MedGen:C0238462, Orphanet:ORPHA1332, SNOMED_CT:255032005|MO…
ERR1840778	chr10	43609100	43609105	22	43609104	43609104	Hereditary_cancer-predisposing_syndrome|Multiple_endocrine_neoplasia, _type_2|MULTIPLE_ENDOCRINE_NEOPLASIA, _TYPE_IIA, _WITH_HIRSCHSPRUNG_DISEASE|MONDO:MONDO:0015356, MedGen:C0027672, Orphanet:ORPHA140162, SNOMED_CT:699346009|MONDO:MONDO:0019003, MedGen:C4048306, Orphanet:ORPHA653, SNOMED_CT:61808009|MedGen:C4016286|Pathogenic
ERR1840778	chr10	43622125	43622130	47	43622126	43622126	Hirschsprung_disease|MONDO:MONDO:0018309, MeSH:D006627, MedGen:C0019569, OMIM:PS142623, Orphanet:ORPHA388, SNOMED_CT:204739008|Pathogenic
ERR1840778	chr13	78475313	78475317	38	78475316	78475316	Waardenburg_syndrome_type_4A|Hirschsprung_disease_2|MONDO:MONDO:0010192, MedGen:C1848519, OMIM:277580|MONDO:MONDO:0010833, MedGen:C1838564, OMIM:600155|Pathogenic
ERR1840778	chrX	153132112	153132121	14	153132113	153132114	Hydrocephalus, _X-linked, _with_hirschsprung_disease|MedGen:C4017784|Pathogenic
ERR1840778	chrX	153132268	153132282	8	153132281	153132281	Hydrocephalus, _X-linked, _with_hirschsprung_disease|MedGen:C4017784|Pathogenic
ERR1840779	chr4	41749364	41749375	13	41749374	41749374	Neuroblastoma_with_Hirschsprung_disease|MedGen:C2751683|Pathogenic
ERR1840785	chr1	21546495	21546504	32	21546501	21546501	Hirschsprung_disease, _cardiac_defects, _and_autonomic_dysfunction|MONDO:MONDO:0013473, MedGen:C3151237, OMIM:613870|Pathogenic
ERR1840785	chr4	41749369	41749381	16	41749374	41749374	Neuroblastoma_with_Hirschsprung_disease|MedGen:C2751683|Pathogenic
