# Supplementary material for: DEVOUR: Deleterious Variants on Uncovered Regions in Whole-Exome Sequencing
Source: PeerJ. 2023 Sep 15;11:e16026. doi: 10.7717/peerj.16026 (PMC10506587; doi:10.7717/peerj.16026)
Supplement: Supplemental Information 3 — The SRA sample id, chromosome name, start/end chromosomal coordinates for the located region, coverage depth for the region, start/end coordinates for the ClinVar annotation and the annotation description. [file peerj-11-16026-s003.xlsx]

## Sheet: hirschsprung_lowCoverageResult
Sample ID	Chromosome	Start	End	Depth	Annotation Start	Annotation End	Annotation Description
ERR1840758	chr10	43609102	43609107	3	43609102	43609102	Multiple_endocrine_neoplasia, _type_2a|Hereditary_cancer-predisposing_syndrome|Hirschsprung_disease|Multiple_endocrine_neoplasia, _type_2|not_provided|MONDO:MONDO:0008234, MeSH:D018813, MedGen:C0025268, OMIM:171400, Orphanet:ORPHA247698, SNOMED_CT:61808009|MONDO:MONDO:0015356, MedGen:C0027672, Orphanet:ORPHA140162, SNOMED_CT:699346009|MONDO:MONDO:0018309, MeSH:D006627, MedGen:C0019569, OMIM:PS142…
ERR1840758	chr10	43609102	43609107	3	43609102	43609102	Multiple_endocrine_neoplasia, _type_2a|Hereditary_cancer-predisposing_syndrome|Hirschsprung_disease|Multiple_endocrine_neoplasia, _type_2|not_specified|MONDO:MONDO:0008234, MeSH:D018813, MedGen:C0025268, OMIM:171400, Orphanet:ORPHA247698, SNOMED_CT:61808009|MONDO:MONDO:0015356, MedGen:C0027672, Orphanet:ORPHA140162, SNOMED_CT:699346009|MONDO:MONDO:0018309, MeSH:D006627, MedGen:C0019569, OMIM:PS14…
ERR1840758	chr10	43609102	43609107	3	43609103	43609103	Medullary_thyroid_carcinoma|Multiple_endocrine_neoplasia, _type_1|Multiple_endocrine_neoplasia, _type_2b|Multiple_endocrine_neoplasia, _type_2a|Multiple_endocrine_neoplasia, _type_4|Hirschsprung_disease|Multiple_endocrine_neoplasia, _type_2|none_provided|not_provided|Human_Phenotype_Ontology:HP:0002865, MONDO:MONDO:0015277, MeSH:C536914, MedGen:C0238462, Orphanet:ORPHA1332, SNOMED_CT:255032005|MO…
ERR1840758	chr10	43609102	43609107	3	43609104	43609104	Hereditary_cancer-predisposing_syndrome|Multiple_endocrine_neoplasia, _type_2|MULTIPLE_ENDOCRINE_NEOPLASIA, _TYPE_IIA, _WITH_HIRSCHSPRUNG_DISEASE|MONDO:MONDO:0015356, MedGen:C0027672, Orphanet:ORPHA140162, SNOMED_CT:699346009|MONDO:MONDO:0019003, MedGen:C4048306, Orphanet:ORPHA653, SNOMED_CT:61808009|MedGen:C4016286|Pathogenic
ERR1840762	chr10	43609074	43609109	3	43609096	43609096	Pheochromocytoma|Hirschsprung_disease_1|Familial_medullary_thyroid_carcinoma|Multiple_endocrine_neoplasia, _type_2b|Multiple_endocrine_neoplasia, _type_2a|Congenital_central_hypoventilation|Multiple_endocrine_neoplasia, _type_2|none_provided|not_provided|Human_Phenotype_Ontology:HP:0002666, MONDO:MONDO:0008233, MedGen:C0031511, OMIM:171300|MONDO:MONDO:0007723, MedGen:C3888239, OMIM:142623|MONDO:M…
ERR1840762	chr10	43609074	43609109	3	43609102	43609102	Multiple_endocrine_neoplasia, _type_2a|Hereditary_cancer-predisposing_syndrome|Hirschsprung_disease|Multiple_endocrine_neoplasia, _type_2|not_provided|MONDO:MONDO:0008234, MeSH:D018813, MedGen:C0025268, OMIM:171400, Orphanet:ORPHA247698, SNOMED_CT:61808009|MONDO:MONDO:0015356, MedGen:C0027672, Orphanet:ORPHA140162, SNOMED_CT:699346009|MONDO:MONDO:0018309, MeSH:D006627, MedGen:C0019569, OMIM:PS142…
ERR1840762	chr10	43609074	43609109	3	43609102	43609102	Multiple_endocrine_neoplasia, _type_2a|Hereditary_cancer-predisposing_syndrome|Hirschsprung_disease|Multiple_endocrine_neoplasia, _type_2|not_specified|MONDO:MONDO:0008234, MeSH:D018813, MedGen:C0025268, OMIM:171400, Orphanet:ORPHA247698, SNOMED_CT:61808009|MONDO:MONDO:0015356, MedGen:C0027672, Orphanet:ORPHA140162, SNOMED_CT:699346009|MONDO:MONDO:0018309, MeSH:D006627, MedGen:C0019569, OMIM:PS14…
ERR1840762	chr10	43609074	43609109	3	43609103	43609103	Medullary_thyroid_carcinoma|Multiple_endocrine_neoplasia, _type_1|Multiple_endocrine_neoplasia, _type_2b|Multiple_endocrine_neoplasia, _type_2a|Multiple_endocrine_neoplasia, _type_4|Hirschsprung_disease|Multiple_endocrine_neoplasia, _type_2|none_provided|not_provided|Human_Phenotype_Ontology:HP:0002865, MONDO:MONDO:0015277, MeSH:C536914, MedGen:C0238462, Orphanet:ORPHA1332, SNOMED_CT:255032005|MO…
ERR1840762	chr10	43609074	43609109	3	43609104	43609104	Hereditary_cancer-predisposing_syndrome|Multiple_endocrine_neoplasia, _type_2|MULTIPLE_ENDOCRINE_NEOPLASIA, _TYPE_IIA, _WITH_HIRSCHSPRUNG_DISEASE|MONDO:MONDO:0015356, MedGen:C0027672, Orphanet:ORPHA140162, SNOMED_CT:699346009|MONDO:MONDO:0019003, MedGen:C4048306, Orphanet:ORPHA653, SNOMED_CT:61808009|MedGen:C4016286|Pathogenic
ERR1840765	chr1	21546480	21548033	0	21546501	21546501	Hirschsprung_disease, _cardiac_defects, _and_autonomic_dysfunction|MONDO:MONDO:0013473, MedGen:C3151237, OMIM:613870|Pathogenic
ERR1840765	chr10	43600447	43600500	3	43600486	43600486	Hirschsprung_disease_1|MONDO:MONDO:0007723, MedGen:C3888239, OMIM:142623|Pathogenic
ERR1840765	chr10	43600551	43601715	0	43600634	43600634	Hirschsprung_disease|MONDO:MONDO:0018309, MeSH:D006627, MedGen:C0019569, OMIM:PS142623, Orphanet:ORPHA388, SNOMED_CT:204739008|Pathogenic
ERR1840765	chr10	43606643	43606671	3	43606667	43606668	Sensorineural_hearing_loss|Hirschsprung_disease_1|Human_Phenotype_Ontology:HP:0000374, Human_Phenotype_Ontology:HP:0000407, Human_Phenotype_Ontology:HP:0001753, Human_Phenotype_Ontology:HP:0001916, Human_Phenotype_Ontology:HP:0008538, Human_Phenotype_Ontology:HP:0008553, Human_Phenotype_Ontology:HP:0008565, Human_Phenotype_Ontology:HP:0008576, Human_Phenotype_Ontology:HP:0008611, Human_Phenotype_…
ERR1840765	chr4	41749364	41749381	4	41749374	41749374	Neuroblastoma_with_Hirschsprung_disease|MedGen:C2751683|Pathogenic
ERR1840765	chrX	153132279	153132284	4	153132281	153132281	Hydrocephalus, _X-linked, _with_hirschsprung_disease|MedGen:C4017784|Pathogenic
ERR1840766	chr1	21546423	21548047	0	21546501	21546501	Hirschsprung_disease, _cardiac_defects, _and_autonomic_dysfunction|MONDO:MONDO:0013473, MedGen:C3151237, OMIM:613870|Pathogenic
ERR1840766	chr10	43600468	43600511	4	43600486	43600486	Hirschsprung_disease_1|MONDO:MONDO:0007723, MedGen:C3888239, OMIM:142623|Pathogenic
ERR1840766	chr10	43600616	43600642	0	43600634	43600634	Hirschsprung_disease|MONDO:MONDO:0018309, MeSH:D006627, MedGen:C0019569, OMIM:PS142623, Orphanet:ORPHA388, SNOMED_CT:204739008|Pathogenic
ERR1840766	chr10	43604794	43606667	0	43606667	43606668	Sensorineural_hearing_loss|Hirschsprung_disease_1|Human_Phenotype_Ontology:HP:0000374, Human_Phenotype_Ontology:HP:0000407, Human_Phenotype_Ontology:HP:0001753, Human_Phenotype_Ontology:HP:0001916, Human_Phenotype_Ontology:HP:0008538, Human_Phenotype_Ontology:HP:0008553, Human_Phenotype_Ontology:HP:0008565, Human_Phenotype_Ontology:HP:0008576, Human_Phenotype_Ontology:HP:0008611, Human_Phenotype_…
ERR1840766	chrX	153132256	153132413	0	153132281	153132281	Hydrocephalus, _X-linked, _with_hirschsprung_disease|MedGen:C4017784|Pathogenic
ERR1840767	chr1	21546456	21546535	1	21546501	21546501	Hirschsprung_disease, _cardiac_defects, _and_autonomic_dysfunction|MONDO:MONDO:0013473, MedGen:C3151237, OMIM:613870|Pathogenic
ERR1840767	chr10	43600412	43600490	2	43600486	43600486	Hirschsprung_disease_1|MONDO:MONDO:0007723, MedGen:C3888239, OMIM:142623|Pathogenic
ERR1840767	chr10	43600608	43601786	0	43600634	43600634	Hirschsprung_disease|MONDO:MONDO:0018309, MeSH:D006627, MedGen:C0019569, OMIM:PS142623, Orphanet:ORPHA388, SNOMED_CT:204739008|Pathogenic
ERR1840767	chr10	43606651	43606688	2	43606667	43606668	Sensorineural_hearing_loss|Hirschsprung_disease_1|Human_Phenotype_Ontology:HP:0000374, Human_Phenotype_Ontology:HP:0000407, Human_Phenotype_Ontology:HP:0001753, Human_Phenotype_Ontology:HP:0001916, Human_Phenotype_Ontology:HP:0008538, Human_Phenotype_Ontology:HP:0008553, Human_Phenotype_Ontology:HP:0008565, Human_Phenotype_Ontology:HP:0008576, Human_Phenotype_Ontology:HP:0008611, Human_Phenotype_…
ERR1840767	chr4	41749366	41749382	2	41749374	41749374	Neuroblastoma_with_Hirschsprung_disease|MedGen:C2751683|Pathogenic
ERR1840767	chrX	153132277	153132299	4	153132281	153132281	Hydrocephalus, _X-linked, _with_hirschsprung_disease|MedGen:C4017784|Pathogenic
ERR1840768	chr1	21546466	21548099	0	21546501	21546501	Hirschsprung_disease, _cardiac_defects, _and_autonomic_dysfunction|MONDO:MONDO:0013473, MedGen:C3151237, OMIM:613870|Pathogenic
ERR1840768	chr10	43600459	43600532	3	43600486	43600486	Hirschsprung_disease_1|MONDO:MONDO:0007723, MedGen:C3888239, OMIM:142623|Pathogenic
ERR1840768	chr10	43600563	43601750	0	43600634	43600634	Hirschsprung_disease|MONDO:MONDO:0018309, MeSH:D006627, MedGen:C0019569, OMIM:PS142623, Orphanet:ORPHA388, SNOMED_CT:204739008|Pathogenic
ERR1840768	chr22	38369491	38369519	0	38369492	38369503	Peripheral_demyelinating_neuropathy, _central_dysmyelination, _Waardenburg_syndrome, _and_Hirschsprung_disease|MONDO:MONDO:0012198, MedGen:C1836727, OMIM:609136, Orphanet:ORPHA163746|Pathogenic
ERR1840768	chr22	38370103	38370394	0	38370151	38370151	Peripheral_demyelinating_neuropathy, _central_dysmyelination, _Waardenburg_syndrome, _and_Hirschsprung_disease|MONDO:MONDO:0012198, MedGen:C1836727, OMIM:609136, Orphanet:ORPHA163746|Pathogenic
ERR1840768	chr22	38370103	38370394	0	38370155	38370155	Peripheral_demyelinating_neuropathy, _central_dysmyelination, _Waardenburg_syndrome, _and_Hirschsprung_disease|MONDO:MONDO:0012198, MedGen:C1836727, OMIM:609136, Orphanet:ORPHA163746|Pathogenic
ERR1840768	chr22	38378410	38379422	0	38379367	38379367	Peripheral_demyelinating_neuropathy, _central_dysmyelination, _Waardenburg_syndrome, _and_Hirschsprung_disease|MONDO:MONDO:0012198, MedGen:C1836727, OMIM:609136, Orphanet:ORPHA163746|Pathogenic
ERR1840768	chr4	41749349	41749391	1	41749374	41749374	Neuroblastoma_with_Hirschsprung_disease|MedGen:C2751683|Pathogenic
ERR1840768	chrX	153132112	153132125	4	153132113	153132114	Hydrocephalus, _X-linked, _with_hirschsprung_disease|MedGen:C4017784|Pathogenic
ERR1840768	chrX	153132274	153132284	4	153132281	153132281	Hydrocephalus, _X-linked, _with_hirschsprung_disease|MedGen:C4017784|Pathogenic
ERR1840769	chr1	21546491	21546520	0	21546501	21546501	Hirschsprung_disease, _cardiac_defects, _and_autonomic_dysfunction|MONDO:MONDO:0013473, MedGen:C3151237, OMIM:613870|Pathogenic
ERR1840769	chr10	43600617	43600648	1	43600634	43600634	Hirschsprung_disease|MONDO:MONDO:0018309, MeSH:D006627, MedGen:C0019569, OMIM:PS142623, Orphanet:ORPHA388, SNOMED_CT:204739008|Pathogenic
ERR1840769	chr10	43606664	43606672	3	43606667	43606668	Sensorineural_hearing_loss|Hirschsprung_disease_1|Human_Phenotype_Ontology:HP:0000374, Human_Phenotype_Ontology:HP:0000407, Human_Phenotype_Ontology:HP:0001753, Human_Phenotype_Ontology:HP:0001916, Human_Phenotype_Ontology:HP:0008538, Human_Phenotype_Ontology:HP:0008553, Human_Phenotype_Ontology:HP:0008565, Human_Phenotype_Ontology:HP:0008576, Human_Phenotype_Ontology:HP:0008611, Human_Phenotype_…
ERR1840769	chr22	38370133	38370472	0	38370151	38370151	Peripheral_demyelinating_neuropathy, _central_dysmyelination, _Waardenburg_syndrome, _and_Hirschsprung_disease|MONDO:MONDO:0012198, MedGen:C1836727, OMIM:609136, Orphanet:ORPHA163746|Pathogenic
ERR1840769	chr22	38370133	38370472	0	38370155	38370155	Peripheral_demyelinating_neuropathy, _central_dysmyelination, _Waardenburg_syndrome, _and_Hirschsprung_disease|MONDO:MONDO:0012198, MedGen:C1836727, OMIM:609136, Orphanet:ORPHA163746|Pathogenic
ERR1840769	chr22	38379305	38379367	1	38379367	38379367	Peripheral_demyelinating_neuropathy, _central_dysmyelination, _Waardenburg_syndrome, _and_Hirschsprung_disease|MONDO:MONDO:0012198, MedGen:C1836727, OMIM:609136, Orphanet:ORPHA163746|Pathogenic
ERR1840769	chrX	153132271	153132294	3	153132281	153132281	Hydrocephalus, _X-linked, _with_hirschsprung_disease|MedGen:C4017784|Pathogenic
ERR1840770	chr1	21546429	21546508	1	21546501	21546501	Hirschsprung_disease, _cardiac_defects, _and_autonomic_dysfunction|MONDO:MONDO:0013473, MedGen:C3151237, OMIM:613870|Pathogenic
ERR1840770	chr10	43600565	43601264	0	43600634	43600634	Hirschsprung_disease|MONDO:MONDO:0018309, MeSH:D006627, MedGen:C0019569, OMIM:PS142623, Orphanet:ORPHA388, SNOMED_CT:204739008|Pathogenic
ERR1840770	chrX	153132258	153132296	1	153132281	153132281	Hydrocephalus, _X-linked, _with_hirschsprung_disease|MedGen:C4017784|Pathogenic
ERR1840771	chr1	21546481	21546501	1	21546501	21546501	Hirschsprung_disease, _cardiac_defects, _and_autonomic_dysfunction|MONDO:MONDO:0013473, MedGen:C3151237, OMIM:613870|Pathogenic
ERR1840771	chr10	43600613	43601172	0	43600634	43600634	Hirschsprung_disease|MONDO:MONDO:0018309, MeSH:D006627, MedGen:C0019569, OMIM:PS142623, Orphanet:ORPHA388, SNOMED_CT:204739008|Pathogenic
ERR1840771	chr10	43606656	43606668	3	43606667	43606668	Sensorineural_hearing_loss|Hirschsprung_disease_1|Human_Phenotype_Ontology:HP:0000374, Human_Phenotype_Ontology:HP:0000407, Human_Phenotype_Ontology:HP:0001753, Human_Phenotype_Ontology:HP:0001916, Human_Phenotype_Ontology:HP:0008538, Human_Phenotype_Ontology:HP:0008553, Human_Phenotype_Ontology:HP:0008565, Human_Phenotype_Ontology:HP:0008576, Human_Phenotype_Ontology:HP:0008611, Human_Phenotype_…
ERR1840771	chrX	153132265	153132281	0	153132281	153132281	Hydrocephalus, _X-linked, _with_hirschsprung_disease|MedGen:C4017784|Pathogenic
ERR1840772	chr1	21546463	21546534	4	21546501	21546501	Hirschsprung_disease, _cardiac_defects, _and_autonomic_dysfunction|MONDO:MONDO:0013473, MedGen:C3151237, OMIM:613870|Pathogenic
ERR1840772	chr10	43600630	43600711	1	43600634	43600634	Hirschsprung_disease|MONDO:MONDO:0018309, MeSH:D006627, MedGen:C0019569, OMIM:PS142623, Orphanet:ORPHA388, SNOMED_CT:204739008|Pathogenic
ERR1840772	chr10	43606647	43606686	4	43606667	43606668	Sensorineural_hearing_loss|Hirschsprung_disease_1|Human_Phenotype_Ontology:HP:0000374, Human_Phenotype_Ontology:HP:0000407, Human_Phenotype_Ontology:HP:0001753, Human_Phenotype_Ontology:HP:0001916, Human_Phenotype_Ontology:HP:0008538, Human_Phenotype_Ontology:HP:0008553, Human_Phenotype_Ontology:HP:0008565, Human_Phenotype_Ontology:HP:0008576, Human_Phenotype_Ontology:HP:0008611, Human_Phenotype_…
ERR1840772	chr22	38369492	38369495	4	38369492	38369503	Peripheral_demyelinating_neuropathy, _central_dysmyelination, _Waardenburg_syndrome, _and_Hirschsprung_disease|MONDO:MONDO:0012198, MedGen:C1836727, OMIM:609136, Orphanet:ORPHA163746|Pathogenic
ERR1840772	chr22	38370146	38370181	1	38370151	38370151	Peripheral_demyelinating_neuropathy, _central_dysmyelination, _Waardenburg_syndrome, _and_Hirschsprung_disease|MONDO:MONDO:0012198, MedGen:C1836727, OMIM:609136, Orphanet:ORPHA163746|Pathogenic
ERR1840772	chr22	38370146	38370181	1	38370155	38370155	Peripheral_demyelinating_neuropathy, _central_dysmyelination, _Waardenburg_syndrome, _and_Hirschsprung_disease|MONDO:MONDO:0012198, MedGen:C1836727, OMIM:609136, Orphanet:ORPHA163746|Pathogenic
ERR1840772	chr22	38374245	38379416	0	38379367	38379367	Peripheral_demyelinating_neuropathy, _central_dysmyelination, _Waardenburg_syndrome, _and_Hirschsprung_disease|MONDO:MONDO:0012198, MedGen:C1836727, OMIM:609136, Orphanet:ORPHA163746|Pathogenic
ERR1840772	chr4	41748462	41749376	0	41749374	41749374	Neuroblastoma_with_Hirschsprung_disease|MedGen:C2751683|Pathogenic
ERR1840772	chrX	153132265	153132285	3	153132281	153132281	Hydrocephalus, _X-linked, _with_hirschsprung_disease|MedGen:C4017784|Pathogenic
ERR1840773	chr1	21546429	21546516	1	21546501	21546501	Hirschsprung_disease, _cardiac_defects, _and_autonomic_dysfunction|MONDO:MONDO:0013473, MedGen:C3151237, OMIM:613870|Pathogenic
ERR1840773	chr10	43600620	43601801	0	43600634	43600634	Hirschsprung_disease|MONDO:MONDO:0018309, MeSH:D006627, MedGen:C0019569, OMIM:PS142623, Orphanet:ORPHA388, SNOMED_CT:204739008|Pathogenic
ERR1840773	chr10	43606660	43606670	1	43606667	43606668	Sensorineural_hearing_loss|Hirschsprung_disease_1|Human_Phenotype_Ontology:HP:0000374, Human_Phenotype_Ontology:HP:0000407, Human_Phenotype_Ontology:HP:0001753, Human_Phenotype_Ontology:HP:0001916, Human_Phenotype_Ontology:HP:0008538, Human_Phenotype_Ontology:HP:0008553, Human_Phenotype_Ontology:HP:0008565, Human_Phenotype_Ontology:HP:0008576, Human_Phenotype_Ontology:HP:0008611, Human_Phenotype_…
ERR1840774	chr1	21546487	21546513	3	21546501	21546501	Hirschsprung_disease, _cardiac_defects, _and_autonomic_dysfunction|MONDO:MONDO:0013473, MedGen:C3151237, OMIM:613870|Pathogenic
ERR1840774	chr10	43600477	43600511	3	43600486	43600486	Hirschsprung_disease_1|MONDO:MONDO:0007723, MedGen:C3888239, OMIM:142623|Pathogenic
ERR1840774	chr10	43600554	43601709	0	43600634	43600634	Hirschsprung_disease|MONDO:MONDO:0018309, MeSH:D006627, MedGen:C0019569, OMIM:PS142623, Orphanet:ORPHA388, SNOMED_CT:204739008|Pathogenic
ERR1840774	chr10	43606659	43606678	2	43606667	43606668	Sensorineural_hearing_loss|Hirschsprung_disease_1|Human_Phenotype_Ontology:HP:0000374, Human_Phenotype_Ontology:HP:0000407, Human_Phenotype_Ontology:HP:0001753, Human_Phenotype_Ontology:HP:0001916, Human_Phenotype_Ontology:HP:0008538, Human_Phenotype_Ontology:HP:0008553, Human_Phenotype_Ontology:HP:0008565, Human_Phenotype_Ontology:HP:0008576, Human_Phenotype_Ontology:HP:0008611, Human_Phenotype_…
ERR1840774	chr22	37819198	38558355	0	38369492	38369503	Peripheral_demyelinating_neuropathy, _central_dysmyelination, _Waardenburg_syndrome, _and_Hirschsprung_disease|MONDO:MONDO:0012198, MedGen:C1836727, OMIM:609136, Orphanet:ORPHA163746|Pathogenic
ERR1840774	chr22	37819198	38558355	0	38369728	38369728	Peripheral_demyelinating_neuropathy, _central_dysmyelination, _Waardenburg_syndrome, _and_Hirschsprung_disease|MONDO:MONDO:0012198, MedGen:C1836727, OMIM:609136, Orphanet:ORPHA163746|Pathogenic
ERR1840774	chr22	37819198	38558355	0	38369962	38369962	Peripheral_demyelinating_neuropathy, _central_dysmyelination, _Waardenburg_syndrome, _and_Hirschsprung_disease|MONDO:MONDO:0012198, MedGen:C1836727, OMIM:609136, Orphanet:ORPHA163746|Pathogenic
ERR1840774	chr22	37819198	38558355	0	38369964	38369964	Peripheral_demyelinating_neuropathy, _central_dysmyelination, _Waardenburg_syndrome, _and_Hirschsprung_disease|MONDO:MONDO:0012198, MedGen:C1836727, OMIM:609136, Orphanet:ORPHA163746|Pathogenic
ERR1840774	chr22	37819198	38558355	0	38369988	38369988	Peripheral_demyelinating_neuropathy, _central_dysmyelination, _Waardenburg_syndrome, _and_Hirschsprung_disease|MONDO:MONDO:0012198, MedGen:C1836727, OMIM:609136, Orphanet:ORPHA163746|Pathogenic
ERR1840774	chr22	37819198	38558355	0	38370151	38370151	Peripheral_demyelinating_neuropathy, _central_dysmyelination, _Waardenburg_syndrome, _and_Hirschsprung_disease|MONDO:MONDO:0012198, MedGen:C1836727, OMIM:609136, Orphanet:ORPHA163746|Pathogenic
ERR1840774	chr22	37819198	38558355	0	38370155	38370155	Peripheral_demyelinating_neuropathy, _central_dysmyelination, _Waardenburg_syndrome, _and_Hirschsprung_disease|MONDO:MONDO:0012198, MedGen:C1836727, OMIM:609136, Orphanet:ORPHA163746|Pathogenic
ERR1840774	chr22	37819198	38558355	0	38379367	38379367	Peripheral_demyelinating_neuropathy, _central_dysmyelination, _Waardenburg_syndrome, _and_Hirschsprung_disease|MONDO:MONDO:0012198, MedGen:C1836727, OMIM:609136, Orphanet:ORPHA163746|Pathogenic
ERR1840774	chrX	153010141	153547918	0	153132113	153132114	Hydrocephalus, _X-linked, _with_hirschsprung_disease|MedGen:C4017784|Pathogenic
ERR1840774	chrX	153010141	153547918	0	153132281	153132281	Hydrocephalus, _X-linked, _with_hirschsprung_disease|MedGen:C4017784|Pathogenic
ERR1840775	chr1	21546494	21546533	1	21546501	21546501	Hirschsprung_disease, _cardiac_defects, _and_autonomic_dysfunction|MONDO:MONDO:0013473, MedGen:C3151237, OMIM:613870|Pathogenic
ERR1840775	chr10	43600440	43600509	1	43600486	43600486	Hirschsprung_disease_1|MONDO:MONDO:0007723, MedGen:C3888239, OMIM:142623|Pathogenic
ERR1840775	chr10	43600614	43601825	0	43600634	43600634	Hirschsprung_disease|MONDO:MONDO:0018309, MeSH:D006627, MedGen:C0019569, OMIM:PS142623, Orphanet:ORPHA388, SNOMED_CT:204739008|Pathogenic
ERR1840775	chr10	43606667	43606689	2	43606667	43606668	Sensorineural_hearing_loss|Hirschsprung_disease_1|Human_Phenotype_Ontology:HP:0000374, Human_Phenotype_Ontology:HP:0000407, Human_Phenotype_Ontology:HP:0001753, Human_Phenotype_Ontology:HP:0001916, Human_Phenotype_Ontology:HP:0008538, Human_Phenotype_Ontology:HP:0008553, Human_Phenotype_Ontology:HP:0008565, Human_Phenotype_Ontology:HP:0008576, Human_Phenotype_Ontology:HP:0008611, Human_Phenotype_…
ERR1840775	chr10	43609092	43609112	4	43609096	43609096	Pheochromocytoma|Hirschsprung_disease_1|Familial_medullary_thyroid_carcinoma|Multiple_endocrine_neoplasia, _type_2b|Multiple_endocrine_neoplasia, _type_2a|Congenital_central_hypoventilation|Multiple_endocrine_neoplasia, _type_2|none_provided|not_provided|Human_Phenotype_Ontology:HP:0002666, MONDO:MONDO:0008233, MedGen:C0031511, OMIM:171300|MONDO:MONDO:0007723, MedGen:C3888239, OMIM:142623|MONDO:M…
ERR1840775	chr10	43609092	43609112	4	43609102	43609102	Multiple_endocrine_neoplasia, _type_2a|Hereditary_cancer-predisposing_syndrome|Hirschsprung_disease|Multiple_endocrine_neoplasia, _type_2|not_provided|MONDO:MONDO:0008234, MeSH:D018813, MedGen:C0025268, OMIM:171400, Orphanet:ORPHA247698, SNOMED_CT:61808009|MONDO:MONDO:0015356, MedGen:C0027672, Orphanet:ORPHA140162, SNOMED_CT:699346009|MONDO:MONDO:0018309, MeSH:D006627, MedGen:C0019569, OMIM:PS142…
ERR1840775	chr10	43609092	43609112	4	43609102	43609102	Multiple_endocrine_neoplasia, _type_2a|Hereditary_cancer-predisposing_syndrome|Hirschsprung_disease|Multiple_endocrine_neoplasia, _type_2|not_specified|MONDO:MONDO:0008234, MeSH:D018813, MedGen:C0025268, OMIM:171400, Orphanet:ORPHA247698, SNOMED_CT:61808009|MONDO:MONDO:0015356, MedGen:C0027672, Orphanet:ORPHA140162, SNOMED_CT:699346009|MONDO:MONDO:0018309, MeSH:D006627, MedGen:C0019569, OMIM:PS14…
ERR1840775	chr10	43609092	43609112	4	43609103	43609103	Medullary_thyroid_carcinoma|Multiple_endocrine_neoplasia, _type_1|Multiple_endocrine_neoplasia, _type_2b|Multiple_endocrine_neoplasia, _type_2a|Multiple_endocrine_neoplasia, _type_4|Hirschsprung_disease|Multiple_endocrine_neoplasia, _type_2|none_provided|not_provided|Human_Phenotype_Ontology:HP:0002865, MONDO:MONDO:0015277, MeSH:C536914, MedGen:C0238462, Orphanet:ORPHA1332, SNOMED_CT:255032005|MO…
ERR1840775	chr10	43609092	43609112	4	43609104	43609104	Hereditary_cancer-predisposing_syndrome|Multiple_endocrine_neoplasia, _type_2|MULTIPLE_ENDOCRINE_NEOPLASIA, _TYPE_IIA, _WITH_HIRSCHSPRUNG_DISEASE|MONDO:MONDO:0015356, MedGen:C0027672, Orphanet:ORPHA140162, SNOMED_CT:699346009|MONDO:MONDO:0019003, MedGen:C4048306, Orphanet:ORPHA653, SNOMED_CT:61808009|MedGen:C4016286|Pathogenic
ERR1840775	chr4	41749355	41749379	1	41749374	41749374	Neuroblastoma_with_Hirschsprung_disease|MedGen:C2751683|Pathogenic
ERR1840775	chrX	153132113	153132136	1	153132113	153132114	Hydrocephalus, _X-linked, _with_hirschsprung_disease|MedGen:C4017784|Pathogenic
ERR1840775	chrX	153132258	153132289	0	153132281	153132281	Hydrocephalus, _X-linked, _with_hirschsprung_disease|MedGen:C4017784|Pathogenic
ERR1840776	chr1	21546491	21548081	0	21546501	21546501	Hirschsprung_disease, _cardiac_defects, _and_autonomic_dysfunction|MONDO:MONDO:0013473, MedGen:C3151237, OMIM:613870|Pathogenic
ERR1840776	chr10	43600597	43600666	1	43600634	43600634	Hirschsprung_disease|MONDO:MONDO:0018309, MeSH:D006627, MedGen:C0019569, OMIM:PS142623, Orphanet:ORPHA388, SNOMED_CT:204739008|Pathogenic
ERR1840776	chr10	43606665	43606689	3	43606667	43606668	Sensorineural_hearing_loss|Hirschsprung_disease_1|Human_Phenotype_Ontology:HP:0000374, Human_Phenotype_Ontology:HP:0000407, Human_Phenotype_Ontology:HP:0001753, Human_Phenotype_Ontology:HP:0001916, Human_Phenotype_Ontology:HP:0008538, Human_Phenotype_Ontology:HP:0008553, Human_Phenotype_Ontology:HP:0008565, Human_Phenotype_Ontology:HP:0008576, Human_Phenotype_Ontology:HP:0008611, Human_Phenotype_…
ERR1840776	chr22	38369489	38369508	1	38369492	38369503	Peripheral_demyelinating_neuropathy, _central_dysmyelination, _Waardenburg_syndrome, _and_Hirschsprung_disease|MONDO:MONDO:0012198, MedGen:C1836727, OMIM:609136, Orphanet:ORPHA163746|Pathogenic
ERR1840776	chr22	38370099	38373619	0	38370151	38370151	Peripheral_demyelinating_neuropathy, _central_dysmyelination, _Waardenburg_syndrome, _and_Hirschsprung_disease|MONDO:MONDO:0012198, MedGen:C1836727, OMIM:609136, Orphanet:ORPHA163746|Pathogenic
ERR1840776	chr22	38370099	38373619	0	38370155	38370155	Peripheral_demyelinating_neuropathy, _central_dysmyelination, _Waardenburg_syndrome, _and_Hirschsprung_disease|MONDO:MONDO:0012198, MedGen:C1836727, OMIM:609136, Orphanet:ORPHA163746|Pathogenic
ERR1840776	chr22	38379350	38379394	2	38379367	38379367	Peripheral_demyelinating_neuropathy, _central_dysmyelination, _Waardenburg_syndrome, _and_Hirschsprung_disease|MONDO:MONDO:0012198, MedGen:C1836727, OMIM:609136, Orphanet:ORPHA163746|Pathogenic
ERR1840776	chr4	41749337	41749382	2	41749374	41749374	Neuroblastoma_with_Hirschsprung_disease|MedGen:C2751683|Pathogenic
ERR1840776	chrX	153132264	153132286	2	153132281	153132281	Hydrocephalus, _X-linked, _with_hirschsprung_disease|MedGen:C4017784|Pathogenic
ERR1840777	chr1	21546483	21546522	2	21546501	21546501	Hirschsprung_disease, _cardiac_defects, _and_autonomic_dysfunction|MONDO:MONDO:0013473, MedGen:C3151237, OMIM:613870|Pathogenic
ERR1840777	chr10	42833500	44099418	0	43595944	43595944	Hirschsprung_disease|MONDO:MONDO:0018309, MeSH:D006627, MedGen:C0019569, OMIM:PS142623, Orphanet:ORPHA388, SNOMED_CT:204739008|Pathogenic
ERR1840777	chr10	42833500	44099418	0	43597990	43597990	Hirschsprung_disease_1|Multiple_endocrine_neoplasia, _type_2|MONDO:MONDO:0007723, MedGen:C3888239, OMIM:142623|MONDO:MONDO:0019003, MedGen:C4048306, Orphanet:ORPHA653, SNOMED_CT:61808009|Pathogenic
ERR1840777	chr10	42833500	44099418	0	43600486	43600486	Hirschsprung_disease_1|MONDO:MONDO:0007723, MedGen:C3888239, OMIM:142623|Pathogenic
ERR1840777	chr10	42833500	44099418	0	43600634	43600634	Hirschsprung_disease|MONDO:MONDO:0018309, MeSH:D006627, MedGen:C0019569, OMIM:PS142623, Orphanet:ORPHA388, SNOMED_CT:204739008|Pathogenic
ERR1840777	chr10	42833500	44099418	0	43604611	43604611	Hirschsprung_disease_1|MONDO:MONDO:0007723, MedGen:C3888239, OMIM:142623|Pathogenic
ERR1840777	chr10	42833500	44099418	0	43606667	43606668	Sensorineural_hearing_loss|Hirschsprung_disease_1|Human_Phenotype_Ontology:HP:0000374, Human_Phenotype_Ontology:HP:0000407, Human_Phenotype_Ontology:HP:0001753, Human_Phenotype_Ontology:HP:0001916, Human_Phenotype_Ontology:HP:0008538, Human_Phenotype_Ontology:HP:0008553, Human_Phenotype_Ontology:HP:0008565, Human_Phenotype_Ontology:HP:0008576, Human_Phenotype_Ontology:HP:0008611, Human_Phenotype_…
ERR1840777	chr10	42833500	44099418	0	43609069	43609069	Familial_medullary_thyroid_carcinoma|Hereditary_cancer-predisposing_syndrome|Hirschsprung_disease|Multiple_endocrine_neoplasia, _type_2|not_provided|MONDO:MONDO:0007958, MedGen:C1833921, OMIM:155240, Orphanet:ORPHA99361|MONDO:MONDO:0015356, MedGen:C0027672, Orphanet:ORPHA140162, SNOMED_CT:699346009|MONDO:MONDO:0018309, MeSH:D006627, MedGen:C0019569, OMIM:PS142623, Orphanet:ORPHA388, SNOMED_CT:204…
ERR1840777	chr10	42833500	44099418	0	43609096	43609096	Pheochromocytoma|Hirschsprung_disease_1|Familial_medullary_thyroid_carcinoma|Multiple_endocrine_neoplasia, _type_2b|Multiple_endocrine_neoplasia, _type_2a|Congenital_central_hypoventilation|Multiple_endocrine_neoplasia, _type_2|none_provided|not_provided|Human_Phenotype_Ontology:HP:0002666, MONDO:MONDO:0008233, MedGen:C0031511, OMIM:171300|MONDO:MONDO:0007723, MedGen:C3888239, OMIM:142623|MONDO:M…
ERR1840777	chr10	42833500	44099418	0	43609102	43609102	Multiple_endocrine_neoplasia, _type_2a|Hereditary_cancer-predisposing_syndrome|Hirschsprung_disease|Multiple_endocrine_neoplasia, _type_2|not_provided|MONDO:MONDO:0008234, MeSH:D018813, MedGen:C0025268, OMIM:171400, Orphanet:ORPHA247698, SNOMED_CT:61808009|MONDO:MONDO:0015356, MedGen:C0027672, Orphanet:ORPHA140162, SNOMED_CT:699346009|MONDO:MONDO:0018309, MeSH:D006627, MedGen:C0019569, OMIM:PS142…
ERR1840777	chr10	42833500	44099418	0	43609102	43609102	Multiple_endocrine_neoplasia, _type_2a|Hereditary_cancer-predisposing_syndrome|Hirschsprung_disease|Multiple_endocrine_neoplasia, _type_2|not_specified|MONDO:MONDO:0008234, MeSH:D018813, MedGen:C0025268, OMIM:171400, Orphanet:ORPHA247698, SNOMED_CT:61808009|MONDO:MONDO:0015356, MedGen:C0027672, Orphanet:ORPHA140162, SNOMED_CT:699346009|MONDO:MONDO:0018309, MeSH:D006627, MedGen:C0019569, OMIM:PS14…
ERR1840777	chr10	42833500	44099418	0	43609103	43609103	Medullary_thyroid_carcinoma|Multiple_endocrine_neoplasia, _type_1|Multiple_endocrine_neoplasia, _type_2b|Multiple_endocrine_neoplasia, _type_2a|Multiple_endocrine_neoplasia, _type_4|Hirschsprung_disease|Multiple_endocrine_neoplasia, _type_2|none_provided|not_provided|Human_Phenotype_Ontology:HP:0002865, MONDO:MONDO:0015277, MeSH:C536914, MedGen:C0238462, Orphanet:ORPHA1332, SNOMED_CT:255032005|MO…
ERR1840777	chr10	42833500	44099418	0	43609104	43609104	Hereditary_cancer-predisposing_syndrome|Multiple_endocrine_neoplasia, _type_2|MULTIPLE_ENDOCRINE_NEOPLASIA, _TYPE_IIA, _WITH_HIRSCHSPRUNG_DISEASE|MONDO:MONDO:0015356, MedGen:C0027672, Orphanet:ORPHA140162, SNOMED_CT:699346009|MONDO:MONDO:0019003, MedGen:C4048306, Orphanet:ORPHA653, SNOMED_CT:61808009|MedGen:C4016286|Pathogenic
ERR1840777	chr10	42833500	44099418	0	43619180	43619180	Hirschsprung_disease|MONDO:MONDO:0018309, MeSH:D006627, MedGen:C0019569, OMIM:PS142623, Orphanet:ORPHA388, SNOMED_CT:204739008|Pathogenic
ERR1840777	chr10	42833500	44099418	0	43622126	43622126	Hirschsprung_disease|MONDO:MONDO:0018309, MeSH:D006627, MedGen:C0019569, OMIM:PS142623, Orphanet:ORPHA388, SNOMED_CT:204739008|Pathogenic
ERR1840777	chr13	78233671	78669118	0	78475316	78475316	Waardenburg_syndrome_type_4A|Hirschsprung_disease_2|MONDO:MONDO:0010192, MedGen:C1848519, OMIM:277580|MONDO:MONDO:0010833, MedGen:C1838564, OMIM:600155|Pathogenic
ERR1840777	chr22	36803649	39710757	0	38369492	38369503	Peripheral_demyelinating_neuropathy, _central_dysmyelination, _Waardenburg_syndrome, _and_Hirschsprung_disease|MONDO:MONDO:0012198, MedGen:C1836727, OMIM:609136, Orphanet:ORPHA163746|Pathogenic
ERR1840777	chr22	36803649	39710757	0	38369728	38369728	Peripheral_demyelinating_neuropathy, _central_dysmyelination, _Waardenburg_syndrome, _and_Hirschsprung_disease|MONDO:MONDO:0012198, MedGen:C1836727, OMIM:609136, Orphanet:ORPHA163746|Pathogenic
ERR1840777	chr22	36803649	39710757	0	38369962	38369962	Peripheral_demyelinating_neuropathy, _central_dysmyelination, _Waardenburg_syndrome, _and_Hirschsprung_disease|MONDO:MONDO:0012198, MedGen:C1836727, OMIM:609136, Orphanet:ORPHA163746|Pathogenic
ERR1840777	chr22	36803649	39710757	0	38369964	38369964	Peripheral_demyelinating_neuropathy, _central_dysmyelination, _Waardenburg_syndrome, _and_Hirschsprung_disease|MONDO:MONDO:0012198, MedGen:C1836727, OMIM:609136, Orphanet:ORPHA163746|Pathogenic
ERR1840777	chr22	36803649	39710757	0	38369988	38369988	Peripheral_demyelinating_neuropathy, _central_dysmyelination, _Waardenburg_syndrome, _and_Hirschsprung_disease|MONDO:MONDO:0012198, MedGen:C1836727, OMIM:609136, Orphanet:ORPHA163746|Pathogenic
ERR1840777	chr22	36803649	39710757	0	38370151	38370151	Peripheral_demyelinating_neuropathy, _central_dysmyelination, _Waardenburg_syndrome, _and_Hirschsprung_disease|MONDO:MONDO:0012198, MedGen:C1836727, OMIM:609136, Orphanet:ORPHA163746|Pathogenic
ERR1840777	chr22	36803649	39710757	0	38370155	38370155	Peripheral_demyelinating_neuropathy, _central_dysmyelination, _Waardenburg_syndrome, _and_Hirschsprung_disease|MONDO:MONDO:0012198, MedGen:C1836727, OMIM:609136, Orphanet:ORPHA163746|Pathogenic
ERR1840777	chr22	36803649	39710757	0	38379367	38379367	Peripheral_demyelinating_neuropathy, _central_dysmyelination, _Waardenburg_syndrome, _and_Hirschsprung_disease|MONDO:MONDO:0012198, MedGen:C1836727, OMIM:609136, Orphanet:ORPHA163746|Pathogenic
ERR1840777	chr4	41749366	41749373	4	41749374	41749374	Neuroblastoma_with_Hirschsprung_disease|MedGen:C2751683|Pathogenic
ERR1840777	chrX	153009492	153627677	0	153132113	153132114	Hydrocephalus, _X-linked, _with_hirschsprung_disease|MedGen:C4017784|Pathogenic
ERR1840777	chrX	153009492	153627677	0	153132281	153132281	Hydrocephalus, _X-linked, _with_hirschsprung_disease|MedGen:C4017784|Pathogenic
ERR1840778	chr1	21546479	21546513	4	21546501	21546501	Hirschsprung_disease, _cardiac_defects, _and_autonomic_dysfunction|MONDO:MONDO:0013473, MedGen:C3151237, OMIM:613870|Pathogenic
ERR1840778	chr10	43600611	43600675	0	43600634	43600634	Hirschsprung_disease|MONDO:MONDO:0018309, MeSH:D006627, MedGen:C0019569, OMIM:PS142623, Orphanet:ORPHA388, SNOMED_CT:204739008|Pathogenic
ERR1840779	chr10	43396525	44023832	0	43595944	43595944	Hirschsprung_disease|MONDO:MONDO:0018309, MeSH:D006627, MedGen:C0019569, OMIM:PS142623, Orphanet:ORPHA388, SNOMED_CT:204739008|Pathogenic
ERR1840779	chr10	43396525	44023832	0	43597990	43597990	Hirschsprung_disease_1|Multiple_endocrine_neoplasia, _type_2|MONDO:MONDO:0007723, MedGen:C3888239, OMIM:142623|MONDO:MONDO:0019003, MedGen:C4048306, Orphanet:ORPHA653, SNOMED_CT:61808009|Pathogenic
ERR1840779	chr10	43396525	44023832	0	43600486	43600486	Hirschsprung_disease_1|MONDO:MONDO:0007723, MedGen:C3888239, OMIM:142623|Pathogenic
ERR1840779	chr10	43396525	44023832	0	43600634	43600634	Hirschsprung_disease|MONDO:MONDO:0018309, MeSH:D006627, MedGen:C0019569, OMIM:PS142623, Orphanet:ORPHA388, SNOMED_CT:204739008|Pathogenic
ERR1840779	chr10	43396525	44023832	0	43604611	43604611	Hirschsprung_disease_1|MONDO:MONDO:0007723, MedGen:C3888239, OMIM:142623|Pathogenic
ERR1840779	chr10	43396525	44023832	0	43606667	43606668	Sensorineural_hearing_loss|Hirschsprung_disease_1|Human_Phenotype_Ontology:HP:0000374, Human_Phenotype_Ontology:HP:0000407, Human_Phenotype_Ontology:HP:0001753, Human_Phenotype_Ontology:HP:0001916, Human_Phenotype_Ontology:HP:0008538, Human_Phenotype_Ontology:HP:0008553, Human_Phenotype_Ontology:HP:0008565, Human_Phenotype_Ontology:HP:0008576, Human_Phenotype_Ontology:HP:0008611, Human_Phenotype_…
ERR1840779	chr10	43396525	44023832	0	43609069	43609069	Familial_medullary_thyroid_carcinoma|Hereditary_cancer-predisposing_syndrome|Hirschsprung_disease|Multiple_endocrine_neoplasia, _type_2|not_provided|MONDO:MONDO:0007958, MedGen:C1833921, OMIM:155240, Orphanet:ORPHA99361|MONDO:MONDO:0015356, MedGen:C0027672, Orphanet:ORPHA140162, SNOMED_CT:699346009|MONDO:MONDO:0018309, MeSH:D006627, MedGen:C0019569, OMIM:PS142623, Orphanet:ORPHA388, SNOMED_CT:204…
ERR1840779	chr10	43396525	44023832	0	43609096	43609096	Pheochromocytoma|Hirschsprung_disease_1|Familial_medullary_thyroid_carcinoma|Multiple_endocrine_neoplasia, _type_2b|Multiple_endocrine_neoplasia, _type_2a|Congenital_central_hypoventilation|Multiple_endocrine_neoplasia, _type_2|none_provided|not_provided|Human_Phenotype_Ontology:HP:0002666, MONDO:MONDO:0008233, MedGen:C0031511, OMIM:171300|MONDO:MONDO:0007723, MedGen:C3888239, OMIM:142623|MONDO:M…
ERR1840779	chr10	43396525	44023832	0	43609102	43609102	Multiple_endocrine_neoplasia, _type_2a|Hereditary_cancer-predisposing_syndrome|Hirschsprung_disease|Multiple_endocrine_neoplasia, _type_2|not_provided|MONDO:MONDO:0008234, MeSH:D018813, MedGen:C0025268, OMIM:171400, Orphanet:ORPHA247698, SNOMED_CT:61808009|MONDO:MONDO:0015356, MedGen:C0027672, Orphanet:ORPHA140162, SNOMED_CT:699346009|MONDO:MONDO:0018309, MeSH:D006627, MedGen:C0019569, OMIM:PS142…
ERR1840779	chr10	43396525	44023832	0	43609102	43609102	Multiple_endocrine_neoplasia, _type_2a|Hereditary_cancer-predisposing_syndrome|Hirschsprung_disease|Multiple_endocrine_neoplasia, _type_2|not_specified|MONDO:MONDO:0008234, MeSH:D018813, MedGen:C0025268, OMIM:171400, Orphanet:ORPHA247698, SNOMED_CT:61808009|MONDO:MONDO:0015356, MedGen:C0027672, Orphanet:ORPHA140162, SNOMED_CT:699346009|MONDO:MONDO:0018309, MeSH:D006627, MedGen:C0019569, OMIM:PS14…
ERR1840779	chr10	43396525	44023832	0	43609103	43609103	Medullary_thyroid_carcinoma|Multiple_endocrine_neoplasia, _type_1|Multiple_endocrine_neoplasia, _type_2b|Multiple_endocrine_neoplasia, _type_2a|Multiple_endocrine_neoplasia, _type_4|Hirschsprung_disease|Multiple_endocrine_neoplasia, _type_2|none_provided|not_provided|Human_Phenotype_Ontology:HP:0002865, MONDO:MONDO:0015277, MeSH:C536914, MedGen:C0238462, Orphanet:ORPHA1332, SNOMED_CT:255032005|MO…
ERR1840779	chr10	43396525	44023832	0	43609104	43609104	Hereditary_cancer-predisposing_syndrome|Multiple_endocrine_neoplasia, _type_2|MULTIPLE_ENDOCRINE_NEOPLASIA, _TYPE_IIA, _WITH_HIRSCHSPRUNG_DISEASE|MONDO:MONDO:0015356, MedGen:C0027672, Orphanet:ORPHA140162, SNOMED_CT:699346009|MONDO:MONDO:0019003, MedGen:C4048306, Orphanet:ORPHA653, SNOMED_CT:61808009|MedGen:C4016286|Pathogenic
ERR1840779	chr10	43396525	44023832	0	43619180	43619180	Hirschsprung_disease|MONDO:MONDO:0018309, MeSH:D006627, MedGen:C0019569, OMIM:PS142623, Orphanet:ORPHA388, SNOMED_CT:204739008|Pathogenic
ERR1840779	chr10	43396525	44023832	0	43622126	43622126	Hirschsprung_disease|MONDO:MONDO:0018309, MeSH:D006627, MedGen:C0019569, OMIM:PS142623, Orphanet:ORPHA388, SNOMED_CT:204739008|Pathogenic
ERR1840779	chr13	78415414	78534347	0	78475316	78475316	Waardenburg_syndrome_type_4A|Hirschsprung_disease_2|MONDO:MONDO:0010192, MedGen:C1848519, OMIM:277580|MONDO:MONDO:0010833, MedGen:C1838564, OMIM:600155|Pathogenic
ERR1840779	chrX	153074834	153245182	0	153132113	153132114	Hydrocephalus, _X-linked, _with_hirschsprung_disease|MedGen:C4017784|Pathogenic
ERR1840779	chrX	153074834	153245182	0	153132281	153132281	Hydrocephalus, _X-linked, _with_hirschsprung_disease|MedGen:C4017784|Pathogenic
ERR1840785	chr10	43406361	43686816	0	43595944	43595944	Hirschsprung_disease|MONDO:MONDO:0018309, MeSH:D006627, MedGen:C0019569, OMIM:PS142623, Orphanet:ORPHA388, SNOMED_CT:204739008|Pathogenic
ERR1840785	chr10	43406361	43686816	0	43597990	43597990	Hirschsprung_disease_1|Multiple_endocrine_neoplasia, _type_2|MONDO:MONDO:0007723, MedGen:C3888239, OMIM:142623|MONDO:MONDO:0019003, MedGen:C4048306, Orphanet:ORPHA653, SNOMED_CT:61808009|Pathogenic
ERR1840785	chr10	43406361	43686816	0	43600486	43600486	Hirschsprung_disease_1|MONDO:MONDO:0007723, MedGen:C3888239, OMIM:142623|Pathogenic
ERR1840785	chr10	43406361	43686816	0	43600634	43600634	Hirschsprung_disease|MONDO:MONDO:0018309, MeSH:D006627, MedGen:C0019569, OMIM:PS142623, Orphanet:ORPHA388, SNOMED_CT:204739008|Pathogenic
ERR1840785	chr10	43406361	43686816	0	43604611	43604611	Hirschsprung_disease_1|MONDO:MONDO:0007723, MedGen:C3888239, OMIM:142623|Pathogenic
ERR1840785	chr10	43406361	43686816	0	43606667	43606668	Sensorineural_hearing_loss|Hirschsprung_disease_1|Human_Phenotype_Ontology:HP:0000374, Human_Phenotype_Ontology:HP:0000407, Human_Phenotype_Ontology:HP:0001753, Human_Phenotype_Ontology:HP:0001916, Human_Phenotype_Ontology:HP:0008538, Human_Phenotype_Ontology:HP:0008553, Human_Phenotype_Ontology:HP:0008565, Human_Phenotype_Ontology:HP:0008576, Human_Phenotype_Ontology:HP:0008611, Human_Phenotype_…
ERR1840785	chr10	43406361	43686816	0	43609069	43609069	Familial_medullary_thyroid_carcinoma|Hereditary_cancer-predisposing_syndrome|Hirschsprung_disease|Multiple_endocrine_neoplasia, _type_2|not_provided|MONDO:MONDO:0007958, MedGen:C1833921, OMIM:155240, Orphanet:ORPHA99361|MONDO:MONDO:0015356, MedGen:C0027672, Orphanet:ORPHA140162, SNOMED_CT:699346009|MONDO:MONDO:0018309, MeSH:D006627, MedGen:C0019569, OMIM:PS142623, Orphanet:ORPHA388, SNOMED_CT:204…
ERR1840785	chr10	43406361	43686816	0	43609096	43609096	Pheochromocytoma|Hirschsprung_disease_1|Familial_medullary_thyroid_carcinoma|Multiple_endocrine_neoplasia, _type_2b|Multiple_endocrine_neoplasia, _type_2a|Congenital_central_hypoventilation|Multiple_endocrine_neoplasia, _type_2|none_provided|not_provided|Human_Phenotype_Ontology:HP:0002666, MONDO:MONDO:0008233, MedGen:C0031511, OMIM:171300|MONDO:MONDO:0007723, MedGen:C3888239, OMIM:142623|MONDO:M…
ERR1840785	chr10	43406361	43686816	0	43609102	43609102	Multiple_endocrine_neoplasia, _type_2a|Hereditary_cancer-predisposing_syndrome|Hirschsprung_disease|Multiple_endocrine_neoplasia, _type_2|not_provided|MONDO:MONDO:0008234, MeSH:D018813, MedGen:C0025268, OMIM:171400, Orphanet:ORPHA247698, SNOMED_CT:61808009|MONDO:MONDO:0015356, MedGen:C0027672, Orphanet:ORPHA140162, SNOMED_CT:699346009|MONDO:MONDO:0018309, MeSH:D006627, MedGen:C0019569, OMIM:PS142…
ERR1840785	chr10	43406361	43686816	0	43609102	43609102	Multiple_endocrine_neoplasia, _type_2a|Hereditary_cancer-predisposing_syndrome|Hirschsprung_disease|Multiple_endocrine_neoplasia, _type_2|not_specified|MONDO:MONDO:0008234, MeSH:D018813, MedGen:C0025268, OMIM:171400, Orphanet:ORPHA247698, SNOMED_CT:61808009|MONDO:MONDO:0015356, MedGen:C0027672, Orphanet:ORPHA140162, SNOMED_CT:699346009|MONDO:MONDO:0018309, MeSH:D006627, MedGen:C0019569, OMIM:PS14…
ERR1840785	chr10	43406361	43686816	0	43609103	43609103	Medullary_thyroid_carcinoma|Multiple_endocrine_neoplasia, _type_1|Multiple_endocrine_neoplasia, _type_2b|Multiple_endocrine_neoplasia, _type_2a|Multiple_endocrine_neoplasia, _type_4|Hirschsprung_disease|Multiple_endocrine_neoplasia, _type_2|none_provided|not_provided|Human_Phenotype_Ontology:HP:0002865, MONDO:MONDO:0015277, MeSH:C536914, MedGen:C0238462, Orphanet:ORPHA1332, SNOMED_CT:255032005|MO…
ERR1840785	chr10	43406361	43686816	0	43609104	43609104	Hereditary_cancer-predisposing_syndrome|Multiple_endocrine_neoplasia, _type_2|MULTIPLE_ENDOCRINE_NEOPLASIA, _TYPE_IIA, _WITH_HIRSCHSPRUNG_DISEASE|MONDO:MONDO:0015356, MedGen:C0027672, Orphanet:ORPHA140162, SNOMED_CT:699346009|MONDO:MONDO:0019003, MedGen:C4048306, Orphanet:ORPHA653, SNOMED_CT:61808009|MedGen:C4016286|Pathogenic
ERR1840785	chr10	43406361	43686816	0	43619180	43619180	Hirschsprung_disease|MONDO:MONDO:0018309, MeSH:D006627, MedGen:C0019569, OMIM:PS142623, Orphanet:ORPHA388, SNOMED_CT:204739008|Pathogenic
ERR1840785	chr10	43406361	43686816	0	43622126	43622126	Hirschsprung_disease|MONDO:MONDO:0018309, MeSH:D006627, MedGen:C0019569, OMIM:PS142623, Orphanet:ORPHA388, SNOMED_CT:204739008|Pathogenic
ERR1840785	chr13	78276287	78513346	0	78475316	78475316	Waardenburg_syndrome_type_4A|Hirschsprung_disease_2|MONDO:MONDO:0010192, MedGen:C1848519, OMIM:277580|MONDO:MONDO:0010833, MedGen:C1838564, OMIM:600155|Pathogenic
ERR1840785	chrX	153112880	153204450	0	153132113	153132114	Hydrocephalus, _X-linked, _with_hirschsprung_disease|MedGen:C4017784|Pathogenic
ERR1840785	chrX	153112880	153204450	0	153132281	153132281	Hydrocephalus, _X-linked, _with_hirschsprung_disease|MedGen:C4017784|Pathogenic
