# Supplementary material for: DEVOUR: Deleterious Variants on Uncovered Regions in Whole-Exome Sequencing
Source: PeerJ. 2023 Sep 15;11:e16026. doi: 10.7717/peerj.16026 (PMC10506587; doi:10.7717/peerj.16026)
Supplement: Supplemental Information 4 — Additional information, ClinVar variation id, and gene name(s), for the located variants. [file peerj-11-16026-s004.xlsx]

## Sheet: ERR1840777
Sample ID	Chromosome	Start	End	Depth	Annotation Start	Annotation End	ClinVar (Variation ID)	Gene	Annotation Description
ERR1840777	chr1	21546483	21546522	2	21546501	21546501	9133	ECE1	Hirschsprung_disease, _cardiac_defects, _and_autonomic_dysfunction|MONDO:MONDO:0013473, MedGen:C3151237, OMIM:613870|Pathogenic
ERR1840777	chr4	41749366	41749373	4	41749374	41749374	6012	PHOX2B	Neuroblastoma_with_Hirschsprung_disease|MedGen:C2751683|Pathogenic
ERR1840777	chr10	42833500	44099418	0	43595944	43595944	599630	RET	Hirschsprung_disease|MONDO:MONDO:0018309, MeSH:D006627, MedGen:C0019569, OMIM:PS142623, Orphanet:ORPHA388, SNOMED_CT:204739008|Pathogenic
ERR1840777	chr10	42833500	44099418	0	43597990	43597990	13925	RET	Hirschsprung_disease_1|Multiple_endocrine_neoplasia, _type_2|MONDO:MONDO:0007723, MedGen:C3888239, OMIM:142623|MONDO:MONDO:0019003, MedGen:C4048306, Orphanet:ORPHA653, SNOMED_CT:61808009|Pathogenic
ERR1840777	chr10	42833500	44099418	0	43600486	43600486	692052	RET	Hirschsprung_disease_1|MONDO:MONDO:0007723, MedGen:C3888239, OMIM:142623|Pathogenic
ERR1840777	chr10	42833500	44099418	0	43600634	43600634	560625	RET	Hirschsprung_disease|MONDO:MONDO:0018309, MeSH:D006627, MedGen:C0019569, OMIM:PS142623, Orphanet:ORPHA388, SNOMED_CT:204739008|Pathogenic
ERR1840777	chr10	42833500	44099418	0	43604611	43604611	274004	RET	Hirschsprung_disease_1|MONDO:MONDO:0007723, MedGen:C3888239, OMIM:142623|Pathogenic
ERR1840777	chr10	42833500	44099418	0	43606667	43606668	590798	RET	Sensorineural_hearing_loss|Hirschsprung_disease_1|Human_Phenotype_Ontology:HP:0000374, Human_Phenotype_Ontology:HP:0000407, Human_Phenotype_Ontology:HP:0001753, Human_Phenotype_Ontology:HP:0001916, Human_Phenotype_Ontology:HP:0008538, Human_Phenotype_Ontology:HP:0008553, Human_Phenotype_Ontology:HP:0008565, Human_Phenotype_Ontology:HP:0008576, Human_Phenotype_Ontology:HP:0008611, Human_Phenotype_…
ERR1840777	chr10	42833500	44099418	0	43609069	43609069	13944	RET	Familial_medullary_thyroid_carcinoma|Hereditary_cancer-predisposing_syndrome|Hirschsprung_disease|Multiple_endocrine_neoplasia, _type_2|not_provided|MONDO:MONDO:0007958, MedGen:C1833921, OMIM:155240, Orphanet:ORPHA99361|MONDO:MONDO:0015356, MedGen:C0027672, Orphanet:ORPHA140162, SNOMED_CT:699346009|MONDO:MONDO:0018309, MeSH:D006627, MedGen:C0019569, OMIM:PS142623, Orphanet:ORPHA388, SNOMED_CT:204…
ERR1840777	chr10	42833500	44099418	0	43609096	43609096	13905	RET	Pheochromocytoma|Hirschsprung_disease_1|Familial_medullary_thyroid_carcinoma|Multiple_endocrine_neoplasia, _type_2b|Multiple_endocrine_neoplasia, _type_2a|Congenital_central_hypoventilation|Multiple_endocrine_neoplasia, _type_2|none_provided|not_provided|Human_Phenotype_Ontology:HP:0002666, MONDO:MONDO:0008233, MedGen:C0031511, OMIM:171300|MONDO:MONDO:0007723, MedGen:C3888239, OMIM:142623|MONDO:M…
ERR1840777	chr10	42833500	44099418	0	43609102	43609102	38602	RET	Multiple_endocrine_neoplasia, _type_2a|Hereditary_cancer-predisposing_syndrome|Hirschsprung_disease|Multiple_endocrine_neoplasia, _type_2|not_provided|MONDO:MONDO:0008234, MeSH:D018813, MedGen:C0025268, OMIM:171400, Orphanet:ORPHA247698, SNOMED_CT:61808009|MONDO:MONDO:0015356, MedGen:C0027672, Orphanet:ORPHA140162, SNOMED_CT:699346009|MONDO:MONDO:0018309, MeSH:D006627, MedGen:C0019569, OMIM:PS142…
ERR1840777	chr10	42833500	44099418	0	43609102	43609102	24905	RET	Multiple_endocrine_neoplasia, _type_2a|Hereditary_cancer-predisposing_syndrome|Hirschsprung_disease|Multiple_endocrine_neoplasia, _type_2|not_specified|MONDO:MONDO:0008234, MeSH:D018813, MedGen:C0025268, OMIM:171400, Orphanet:ORPHA247698, SNOMED_CT:61808009|MONDO:MONDO:0015356, MedGen:C0027672, Orphanet:ORPHA140162, SNOMED_CT:699346009|MONDO:MONDO:0018309, MeSH:D006627, MedGen:C0019569, OMIM:PS14…
ERR1840777	chr10	42833500	44099418	0	43609103	43609103	13916	RET	Medullary_thyroid_carcinoma|Multiple_endocrine_neoplasia, _type_1|Multiple_endocrine_neoplasia, _type_2b|Multiple_endocrine_neoplasia, _type_2a|Multiple_endocrine_neoplasia, _type_4|Hirschsprung_disease|Multiple_endocrine_neoplasia, _type_2|none_provided|not_provided|Human_Phenotype_Ontology:HP:0002865, MONDO:MONDO:0015277, MeSH:C536914, MedGen:C0238462, Orphanet:ORPHA1332, SNOMED_CT:255032005|MO…
ERR1840777	chr10	42833500	44099418	0	43609104	43609104	13934	RET	Hereditary_cancer-predisposing_syndrome|Multiple_endocrine_neoplasia, _type_2|MULTIPLE_ENDOCRINE_NEOPLASIA, _TYPE_IIA, _WITH_HIRSCHSPRUNG_DISEASE|MONDO:MONDO:0015356, MedGen:C0027672, Orphanet:ORPHA140162, SNOMED_CT:699346009|MONDO:MONDO:0019003, MedGen:C4048306, Orphanet:ORPHA653, SNOMED_CT:61808009|MedGen:C4016286|Pathogenic
ERR1840777	chr10	42833500	44099418	0	43619180	43619180	599634	RET	Hirschsprung_disease|MONDO:MONDO:0018309, MeSH:D006627, MedGen:C0019569, OMIM:PS142623, Orphanet:ORPHA388, SNOMED_CT:204739008|Pathogenic
ERR1840777	chr10	42833500	44099418	0	43622126	43622126	599635	RET	Hirschsprung_disease|MONDO:MONDO:0018309, MeSH:D006627, MedGen:C0019569, OMIM:PS142623, Orphanet:ORPHA388, SNOMED_CT:204739008|Pathogenic
ERR1840777	chr13	78233671	78669118	0	78475316	78475316	16633	EDNRB	Waardenburg_syndrome_type_4A|Hirschsprung_disease_2|MONDO:MONDO:0010192, MedGen:C1848519, OMIM:277580|MONDO:MONDO:0010833, MedGen:C1838564, OMIM:600155|Pathogenic
ERR1840777	chr22	36803649	39710757	0	38369492	38369503	7400	POLR2F, SOX10	Peripheral_demyelinating_neuropathy, _central_dysmyelination, _Waardenburg_syndrome, _and_Hirschsprung_disease|MONDO:MONDO:0012198, MedGen:C1836727, OMIM:609136, Orphanet:ORPHA163746|Pathogenic
ERR1840777	chr22	36803649	39710757	0	38369728	38369728	915453	POLR2F, SOX10	Peripheral_demyelinating_neuropathy, _central_dysmyelination, _Waardenburg_syndrome, _and_Hirschsprung_disease|MONDO:MONDO:0012198, MedGen:C1836727, OMIM:609136, Orphanet:ORPHA163746|Pathogenic
ERR1840777	chr22	36803649	39710757	0	38369962	38369962	976284	POLR2F, SOX10	Peripheral_demyelinating_neuropathy, _central_dysmyelination, _Waardenburg_syndrome, _and_Hirschsprung_disease|MONDO:MONDO:0012198, MedGen:C1836727, OMIM:609136, Orphanet:ORPHA163746|Pathogenic
ERR1840777	chr22	36803649	39710757	0	38369964	38369964	7398	POLR2F, SOX10	Peripheral_demyelinating_neuropathy, _central_dysmyelination, _Waardenburg_syndrome, _and_Hirschsprung_disease|MONDO:MONDO:0012198, MedGen:C1836727, OMIM:609136, Orphanet:ORPHA163746|Pathogenic
ERR1840777	chr22	36803649	39710757	0	38369988	38369988	7412	POLR2F, SOX10	Peripheral_demyelinating_neuropathy, _central_dysmyelination, _Waardenburg_syndrome, _and_Hirschsprung_disease|MONDO:MONDO:0012198, MedGen:C1836727, OMIM:609136, Orphanet:ORPHA163746|Pathogenic
ERR1840777	chr22	36803649	39710757	0	38370151	38370151	7399	POLR2F, SOX10	Peripheral_demyelinating_neuropathy, _central_dysmyelination, _Waardenburg_syndrome, _and_Hirschsprung_disease|MONDO:MONDO:0012198, MedGen:C1836727, OMIM:609136, Orphanet:ORPHA163746|Pathogenic
ERR1840777	chr22	36803649	39710757	0	38370155	38370155	7403	POLR2F, SOX10	Peripheral_demyelinating_neuropathy, _central_dysmyelination, _Waardenburg_syndrome, _and_Hirschsprung_disease|MONDO:MONDO:0012198, MedGen:C1836727, OMIM:609136, Orphanet:ORPHA163746|Pathogenic
ERR1840777	chr22	36803649	39710757	0	38379367	38379367	915461	POLR2F, SOX10	Peripheral_demyelinating_neuropathy, _central_dysmyelination, _Waardenburg_syndrome, _and_Hirschsprung_disease|MONDO:MONDO:0012198, MedGen:C1836727, OMIM:609136, Orphanet:ORPHA163746|Pathogenic
ERR1840777	chrX	153009492	153627677	0	153132113	153132114	9996	L1CAM	Hydrocephalus, _X-linked, _with_hirschsprung_disease|MedGen:C4017784|Pathogenic
ERR1840777	chrX	153009492	153627677	0	153132281	153132281	9998	L1CAM	Hydrocephalus, _X-linked, _with_hirschsprung_disease|MedGen:C4017784|Pathogenic
