# Supplementary material for: DEVOUR: Deleterious Variants on Uncovered Regions in Whole-Exome Sequencing
Source: PeerJ. 2023 Sep 15;11:e16026. doi: 10.7717/peerj.16026 (PMC10506587; doi:10.7717/peerj.16026)
Supplement: Supplemental Information 5 — The data highlights the distribution of low-coverage regions across different chromosomes and their respective lengths for each sample. Samples with Hirschsprung-related variants are observed to exhibit larger proportions of low-coverage regions, indicating potential challenges in accurately detecting variants in these genomic regions. Please note that if a sample has a length of 0 for a particular chromosome, it means there were no records for that chromosome in the sample. This could be due to various factors, such as technical limitations or the absence of reads in that specific chromosome for the given sample. [file peerj-11-16026-s005.xlsx]

## Sheet: Sheet1
The total length of low-coverage (depth = 0 / depth < 5) regions per chromosome for each sample
Sample ID	chr1	chr2	chr3	chr4	chr5	chr6	chr7	chr8	chr9	chr10	chr11	chr12	chr13	chr14	chr15	chr16	chr17	chr18	chr19	chr20	chr21	chr22	chrX	chrY
ERR1840747	20732 / 218096	40317 / 349618	18175 / 166023	5954 / 58753	7963 / 100445	8112 / 169782	7498 / 115125	7890 / 115302	18596 / 69870	4550 / 184832	17230 / 346007	10535 / 78795	1661 / 41959117	8381 / 19044962	7060 / 25182597	38291 / 163625	43468 / 237955	3397 / 35726	14966 / 40900	6104 / 28770	1587 / 3388	121 / 41911231	21990 / 375137	0 / 0
ERR1840748	22097 / 212006	43982 / 348422	16880 / 3276390	4996 / 50991	9637 / 109119	8794 / 150631	8872 / 117263	8329 / 96083	16503 / 102747	5547 / 184503	18851 / 251302	9868 / 88145	2203 / 36725011	4744 / 50313390	7096 / 25181977	37962 / 159156	44838 / 246714	4829 / 47443	14556 / 42622	5679 / 37015	1681 / 3745	349 / 50332039	23337 / 392848	0 / 0
ERR1840749	23370 / 239426	38036 / 404770	14153 / 207140	5574 / 52950	9827 / 132042	9701 / 285386	9101 / 143367	8592 / 117138	17641 / 107745	6054 / 59700	16802 / 285303	10880 / 144189	4348 / 48147	7337 / 19050847	4339 / 67111089	32862 / 184455	38339 / 277981	2649 / 52845	13796 / 47164	5977 / 46813	1435 / 25168936	2801 / 25153390	20006 / 289789	0 / 465740
ERR1840753	23947 / 202055	41614 / 321680	20365 / 142482	6259 / 49891	9481 / 110398	9254 / 165822	8943 / 116766	10473 / 97573	18144 / 83737	5102 / 205269	16990 / 387496	10838 / 95615	2905 / 36716857	7647 / 31439469	7784 / 36743110	35125 / 162135	44849 / 222406	3500 / 37616	13843 / 53032	5974 / 27827	1591 / 4295	7291 / 46799	25038 / 376819	0 / 0
ERR1840754	22778 / 224437	40046 / 330273	16064 / 180168	6559 / 59613	9576 / 101554	9589 / 158756	9182 / 134425	9652 / 100011	19162 / 89827	5658 / 56536	17938 / 366516	9100 / 117726	3209 / 26248174	8985 / 19687780	7005 / 25187557	37146 / 141559	45109 / 229832	3757 / 48236	14691 / 42897	6722 / 29815	1305 / 1456	5848 / 37922	24896 / 357370	0 / 0
ERR1840755	20350 / 228627	39293 / 360283	16306 / 168952	5491 / 46691	9291 / 98242	9957 / 154170	8628 / 135466	9678 / 105002	16049 / 92043	4750 / 165143	17022 / 501580	9142 / 105880	4312 / 22063203	6109 / 50316878	3078 / 58744087	36763 / 170828	42468 / 234801	2947 / 43308	13424 / 45407	5161 / 31324	1799 / 16778420	391 / 41864004	20276 / 240972	0 / 561861
ERR1840756	21194 / 240685	38347 / 344814	17612 / 166064	5312 / 43936	8987 / 112710	8402 / 496854	9699 / 133356	7723 / 110358	20845 / 89302	5597 / 45506	18606 / 200506	10701 / 115432	4599 / 27299646	8876 / 19665636	6802 / 40922490	37052 / 160576	48834 / 232575	3937 / 56349	14742 / 41805	5470 / 30834	1367 / 33557854	241 / 41933262	24694 / 399485	0 / 0
ERR1840757	23380 / 181338	48320 / 299867	21485 / 131820	6387 / 50811	9593 / 89823	9123 / 161845	9935 / 93781	11013 / 91581	20896 / 71710	5203 / 169658	19417 / 172773	10312 / 89963	2891 / 42934034	5919 / 50332608	9536 / 24158012	41074 / 135005	48224 / 225699	3853 / 33424	15901 / 34353	6277 / 550536	1621 / 1218	6395 / 37953	26147 / 357127	0 / 0
ERR1840758	17744 / 197896	41097 / 332536	16896 / 173277	5913 / 45994	7797 / 85065	9461 / 485420	8512 / 113957	8262 / 88397	17272 / 73899	4748 / 184345	17809 / 196997	9934 / 97862	4099 / 22023991	6489 / 25199707	7048 / 25176921	37026 / 144943	44621 / 262693	4683 / 44536	12966 / 40979	6005 / 29582	1302 / 4022	1978 / 33522773	21840 / 246621	0 / 394945
ERR1840762	21855 / 223361	40780 / 348139	16248 / 3317386	6503 / 47390	9350 / 116180	8961 / 267753	9255 / 130251	7537 / 113297	16892 / 104691	6161 / 196030	16943 / 489111	10829 / 107426	2609 / 41958471	7064 / 21018042	2273 / 58749757	34047 / 173485	40926 / 278378	4015 / 51542	12390 / 43233	5394 / 3176527	1448 / 2719	5891 / 37630	24831 / 456345	0 / 0
ERR1840763	23863 / 272223	38649 / 375762	15348 / 236021	5548 / 58426	9556 / 115103	10038 / 588919	9391 / 148229	8952 / 123607	16091 / 128341	5398 / 195542	16516 / 228131	10133 / 132781	2147 / 41961940	8127 / 19054959	8531 / 25231050	31755 / 196757	36281 / 286522	2096 / 56258	13102 / 49591	4002 / 40250	1537 / 2758	645 / 50331843	24660 / 533262	0 / 0
ERR1840764	22412 / 219152	41953 / 326518	15016 / 3308037	6446 / 40588	9069 / 110980	9172 / 363949	8683 / 126902	8855 / 116895	19486 / 68242	5769 / 33856	18169 / 275223	9644 / 115074	2276 / 36712383	6294 / 21020180	5789 / 33588614	38550 / 162980	49669 / 238975	3126 / 51077	14512 / 41268	5452 / 36308	1800 / 16766220	2996 / 25195084	20938 / 275089	0 / 501599
ERR1840765	25979 / 1141795	33947 / 1379851	12929 / 709964	7793 / 468790	9942 / 597327	14075 / 687337	10354 / 635642	9263 / 609259	17657 / 404233	7685 / 5498823	21277 / 841606	13579 / 710699	5124 / 238400	7631 / 19414035	8851 / 370162	27757 / 579340	29732 / 639993	3297 / 297405	21090 / 424669	7367 / 767858	4611 / 73788	2986 / 41932819	14169 / 42480000	0 / 678453
ERR1840766	18758 / 946272	29429 / 1313000	6822 / 46473963	5207 / 398285	8555 / 488551	11681 / 682066	9745 / 525332	6878 / 525433	14172 / 410350	7191 / 383446	16883 / 741116	10648 / 751856	4608 / 237673	4357 / 58944032	7209 / 236175	22985 / 644098	25495 / 656018	1995 / 225736	16529 / 368879	5887 / 918169	3444 / 55810	2168 / 50331263	29537 / 3219937	45 / 0
ERR1840767	18337 / 934804	25650 / 1349304	11551 / 697607	5691 / 455398	8063 / 618834	10967 / 731717	8442 / 494178	7934 / 666345	14098 / 499975	6703 / 328388	15403 / 811977	10789 / 816525	4022 / 274072	6577 / 19381581	7308 / 316864	22458 / 723680	24792 / 733090	2344 / 196707	15234 / 351071	5640 / 191775	3643 / 68474	2021 / 41940476	14030 / 8183189	0 / 596512
ERR1840768	40889 / 1040437	58000 / 1303341	22398 / 665311	13839 / 446270	19770 / 557215	20743 / 750047	19579 / 508950	15404 / 497697	24884 / 689177	14397 / 638766	31957 / 1012873	21991 / 568636	7916 / 25316118	9624 / 42095018	15754 / 309668	38542 / 941767	43526 / 811050	6528 / 215744	28506 / 588562	10322 / 278091	7537 / 108363	11129 / 345083	33883 / 830129	0 / 757386
ERR1840769	15527 / 626199	23341 / 872868	10230 / 377878	4799 / 231608	7026 / 318728	8255 / 476274	7054 / 310310	5653 / 306203	12355 / 283345	3950 / 173936	13947 / 526231	8544 / 425059	1893 / 42022473	5731 / 19150141	5588 / 213723	21285 / 383372	23847 / 450710	2133 / 202378	14190 / 228211	5695 / 511092	2759 / 46092	3453 / 25173686	19945 / 767628	0 / 0
ERR1840770	22984 / 648537	34376 / 874594	13017 / 403056	6864 / 251531	10763 / 307260	11816 / 481724	11053 / 322147	9592 / 381302	14511 / 332186	6178 / 208678	18137 / 568218	11622 / 456598	2658 / 42005843	6560 / 25317310	6352 / 42041321	26018 / 447113	27802 / 486967	3232 / 159001	18578 / 257029	6823 / 142538	3836 / 40727	2216 / 41935261	18700 / 6718205	0 / 680343
ERR1840771	15433 / 711019	25166 / 916178	9536 / 14060759	5074 / 314618	7004 / 353125	9419 / 493641	7223 / 395555	5444 / 421849	11647 / 320790	4914 / 217451	14856 / 533184	7801 / 496735	3613 / 131871	4017 / 58796761	5750 / 189266	17932 / 544144	20528 / 508564	2108 / 157101	12787 / 190329	5419 / 101244	2689 / 42851	1663 / 41937337	21642 / 1162712	0 / 0
ERR1840772	21873 / 883190	31440 / 1302036	13361 / 5788543	6279 / 413125	8817 / 508910	14893 / 882544	11541 / 483965	8460 / 581869	17576 / 381326	6762 / 3905477	21052 / 831204	12106 / 554574	4534 / 378520	7133 / 19327076	8554 / 270258	28731 / 603479	31013 / 714892	2689 / 253739	20066 / 281770	7695 / 210639	4098 / 53114	5816 / 25276473	34133 / 1450616	54 / 0
ERR1840773	18077 / 873447	28298 / 1331702	11482 / 603647	5382 / 377119	8795 / 678441	10731 / 634423	8948 / 477360	8107 / 482896	14709 / 455720	5484 / 316152	14842 / 671772	9993 / 565552	2961 / 25334718	5828 / 19282827	5584 / 42164754	22216 / 473805	25346 / 630301	2086 / 204571	16086 / 321886	6229 / 145513	3328 / 50377	1654 / 50326175	15960 / 895422	0 / 908973
ERR1840774	17017 / 892094	25591 / 1323086	10276 / 3684557	5127 / 378680	7059 / 443134	10820 / 624202	8101 / 446395	7123 / 487591	13614 / 449868	5854 / 2345898	16294 / 644413	10238 / 696640	3548 / 218554	5506 / 19333752	6574 / 25366325	20508 / 642424	23322 / 607505	2460 / 239542	14716 / 340475	5922 / 150931	276 / 44461005	192 / 27599480	1393 / 96176659	0 / 4729666
ERR1840775	28527 / 1180505	38882 / 1376022	8069 / 50917079	8646 / 1048300	12286 / 644274	15535 / 805171	14199 / 655076	10900 / 670806	19081 / 552582	9741 / 408070	26090 / 1001800	15337 / 622902	2892 / 42136599	9975 / 19386514	11141 / 312375	32394 / 700520	35764 / 813402	2930 / 374212	24687 / 418370	9522 / 766056	5886 / 106602	3301 / 41957119	43096 / 1532052	12 / 0
ERR1840776	21030 / 1180521	28321 / 1498083	5336 / 50814714	6318 / 528384	8994 / 845443	11533 / 648725	10396 / 759013	7523 / 557809	16018 / 466138	7223 / 372046	17141 / 892530	11043 / 911545	1786 / 42043422	6566 / 19485469	7539 / 304161	23071 / 784316	25516 / 822091	2889 / 322782	18617 / 355371	6362 / 205683	4775 / 125597	7134 / 243791	15853 / 9633687	0 / 867244
ERR1840777	23153 / 1122960	33542 / 1258457	14442 / 2184701	8348 / 321534	10244 / 505377	13621 / 802347	12002 / 553105	105 / 109325686	1144 / 93404413	984 / 113063085	494 / 117195456	0 / 112705452	0 / 81803569	0 / 86143160	0 / 71764063	0 / 69982550	130 / 73987647	0 / 66311800	134 / 49896871	0 / 53007210	0 / 26840492	0 / 30828759	346 / 116551826	0 / 7005858
ERR1840778	18710 / 336798	38056 / 413416	16590 / 203314	5288 / 124544	7890 / 189110	10112 / 282397	8057 / 154535	9574 / 171102	13585 / 150946	5846 / 110256	16081 / 309200	9367 / 212466	3263 / 62573	6480 / 31517500	7029 / 25235524	23726 / 252117	28634 / 333353	3390 / 71799	14013 / 166495	6049 / 74853	2369 / 41965349	2048 / 41935343	12866 / 245746	104 / 349946
ERR1840779	49412 / 131790	97998 / 224810	43723 / 112357	13134 / 56473	636 / 49295784	152 / 55025229	340 / 49639457	0 / 36692527	466 / 33687409	0 / 44995567	533 / 48379888	332 / 42450442	0 / 22242567	0 / 77287930	0 / 34967770	302 / 32570315	204 / 41057667	0 / 21119503	0 / 26176189	0 / 27101334	0 / 11114029	0 / 44942814	785 / 46103135	0 / 635793
ERR1840785	73176 / 45659	151075 / 90349	62511 / 36739	12840 / 8217	28194 / 16467	19297 / 76590	26625 / 25831	40593 / 22885	2113 / 19437606	1271 / 33113023	396 / 32479725	320 / 30429176	45 / 40943053	0 / 60184831	74 / 50327335	277 / 27820543	268 / 30229569	0 / 15898396	426 / 18121809	101 / 18228739	0 / 8662135	0 / 44807799	506 / 33756408	0 / 467540
Average Length	24735.86 / 548404.61	42698.07 / 748920.68	17029.32 / 6757426.75	6841.82 / 229603.93	9791.61 / 2058915.75	10864.79 / 2411918.61	10048.50 / 2067704.96	9268.18 / 5488446.54	15185.96 / 5464579.21	5668.57 / 7419999.36	16345.57 / 7540790.64	9843.79 / 6952276.61	3075.79 / 26501464.25	6141.32 / 33614014.11	6416.00 / 26441678.75	27351.96 / 5001753.11	31912.32 / 5587762.50	2888.21 / 3814599.14	14448.14 / 3536115.61	5616.07 / 3816690.21	2418.71 / 8075351.29	2883.14 / 30782771.71	19839.18 / 13357436.25	7.68 / 700066.39
Please note that if a sample has a length of 0 for a particular chromosome, it means there were no records for that chromosome in the sample. This could be due to various factors, such as technical limitations or the absence of reads in that specific chromosome for the given sample.
